# Supplementary figures and images for: Regioselective 5-exo-dig oxy-cyclization of 2-alkynylbenzamide for the synthesis of isobenzofuran-1-imines and isobenzofuran
Source: Royal Society of Chemistry journal article supplement (doi:10.1039/c8ob00779a), 2018-01-01

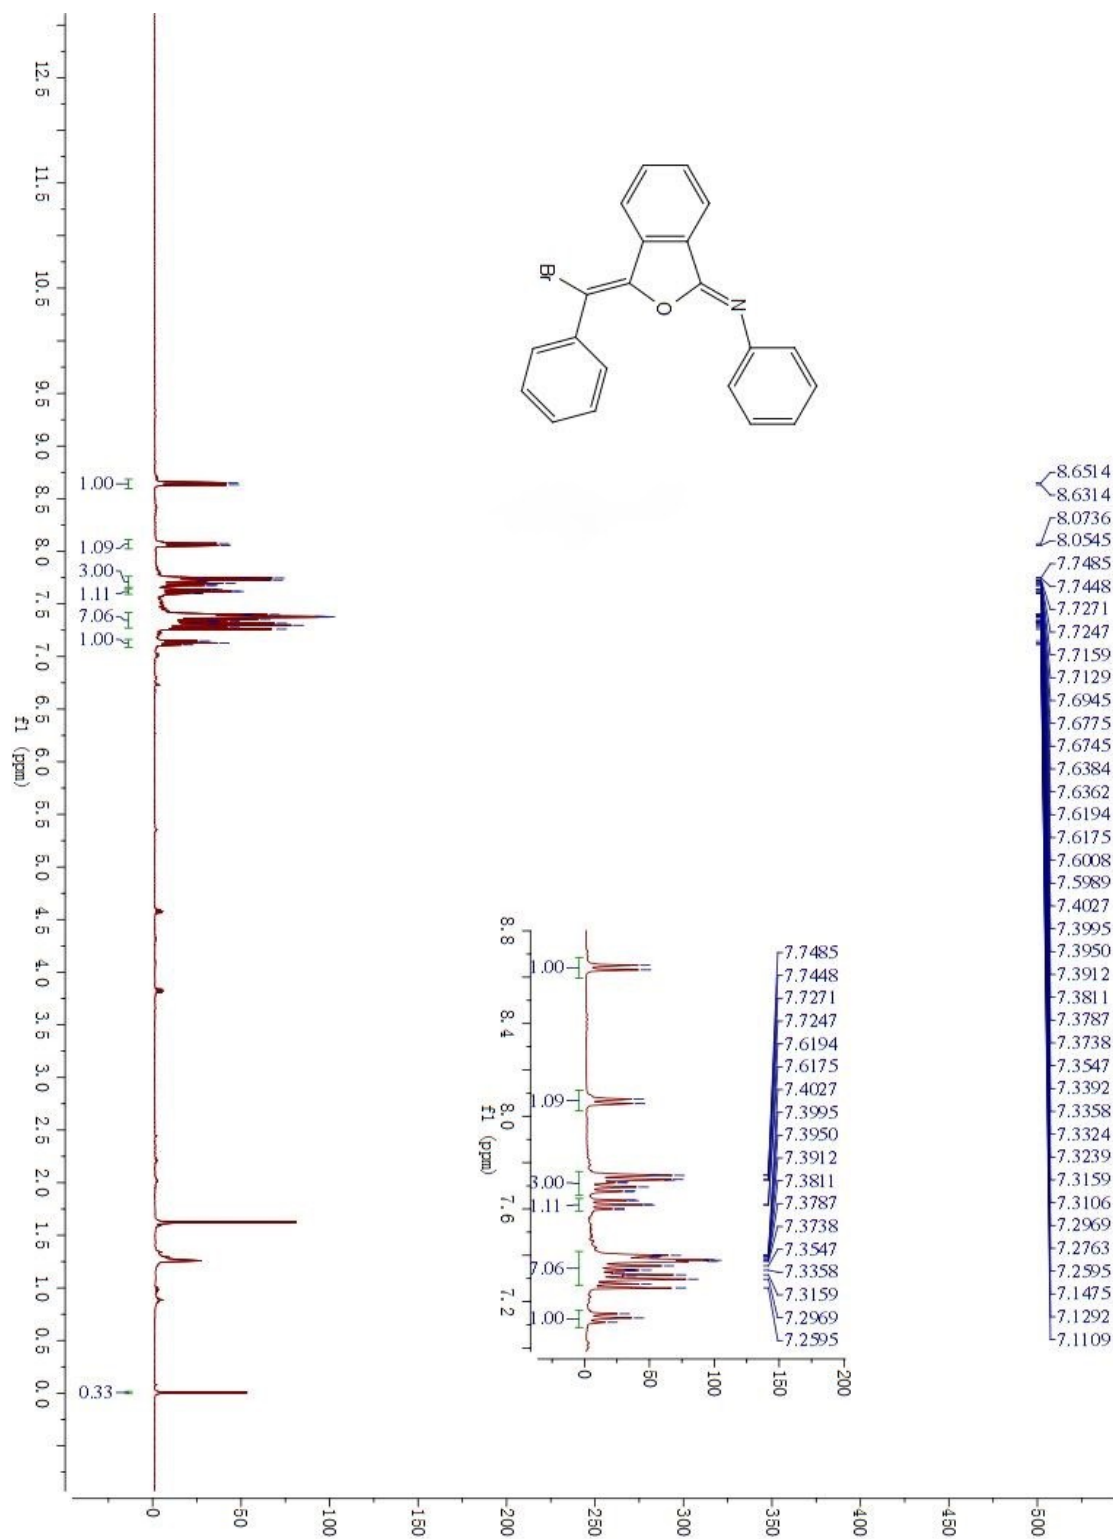

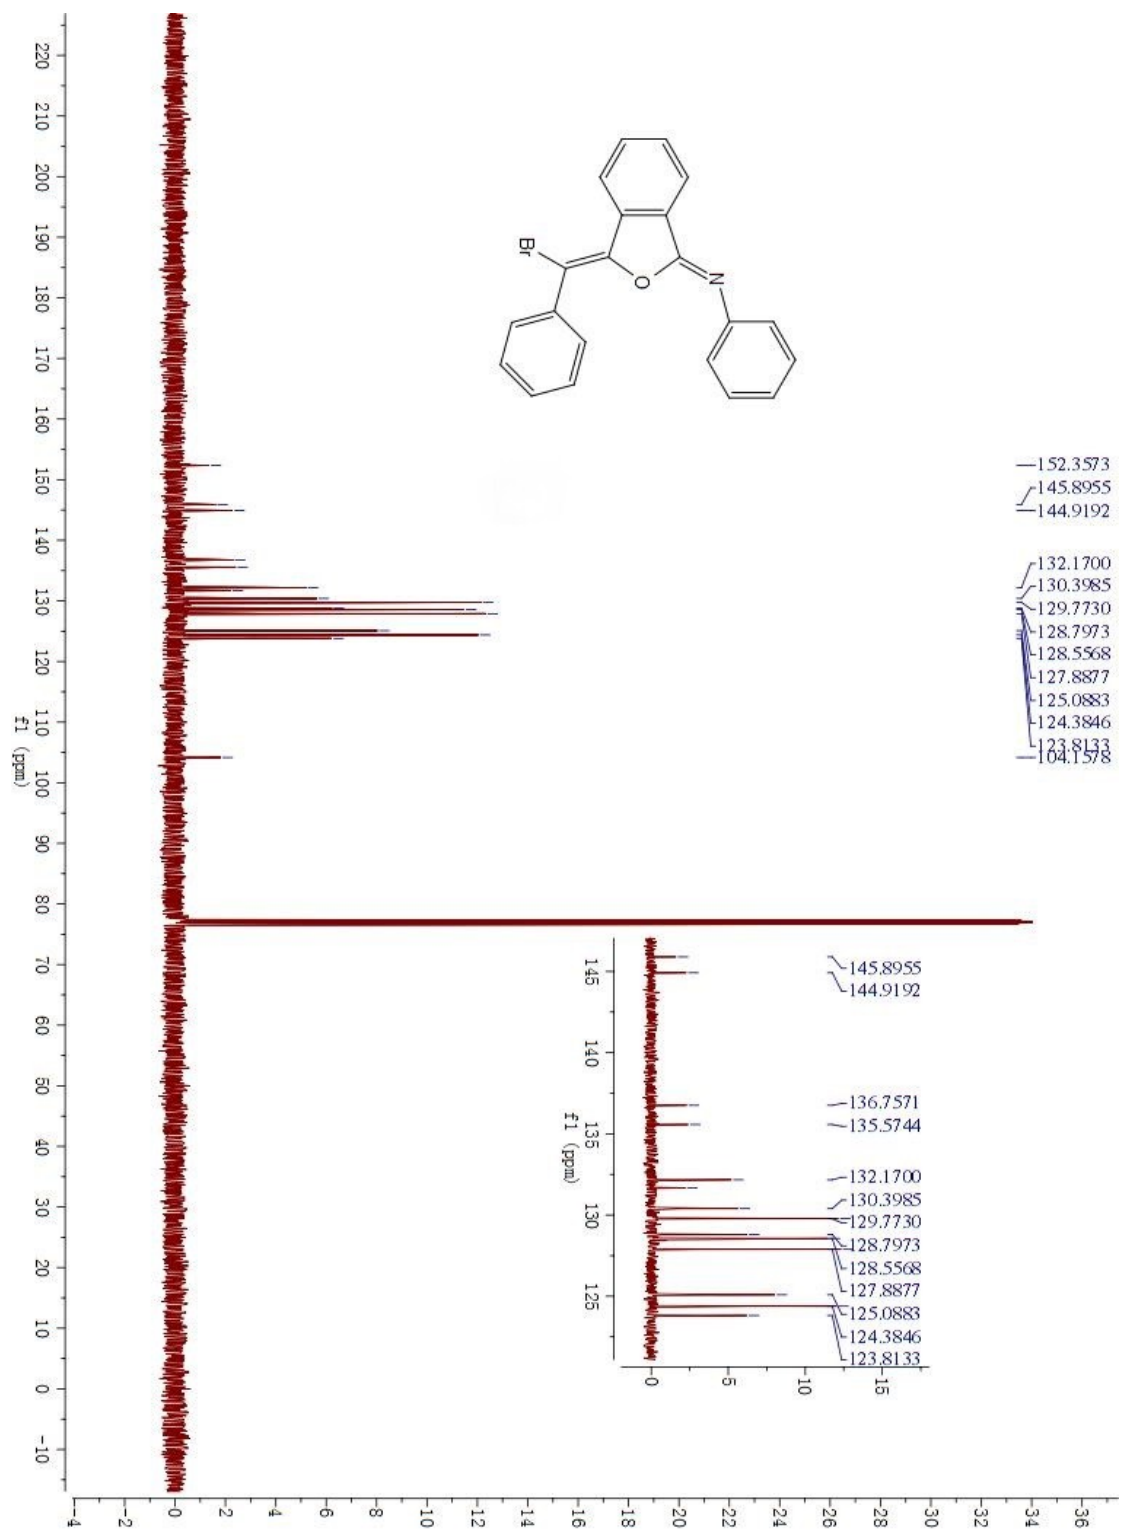

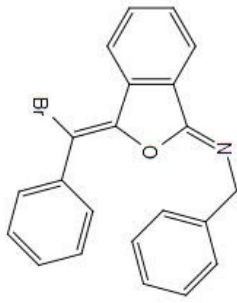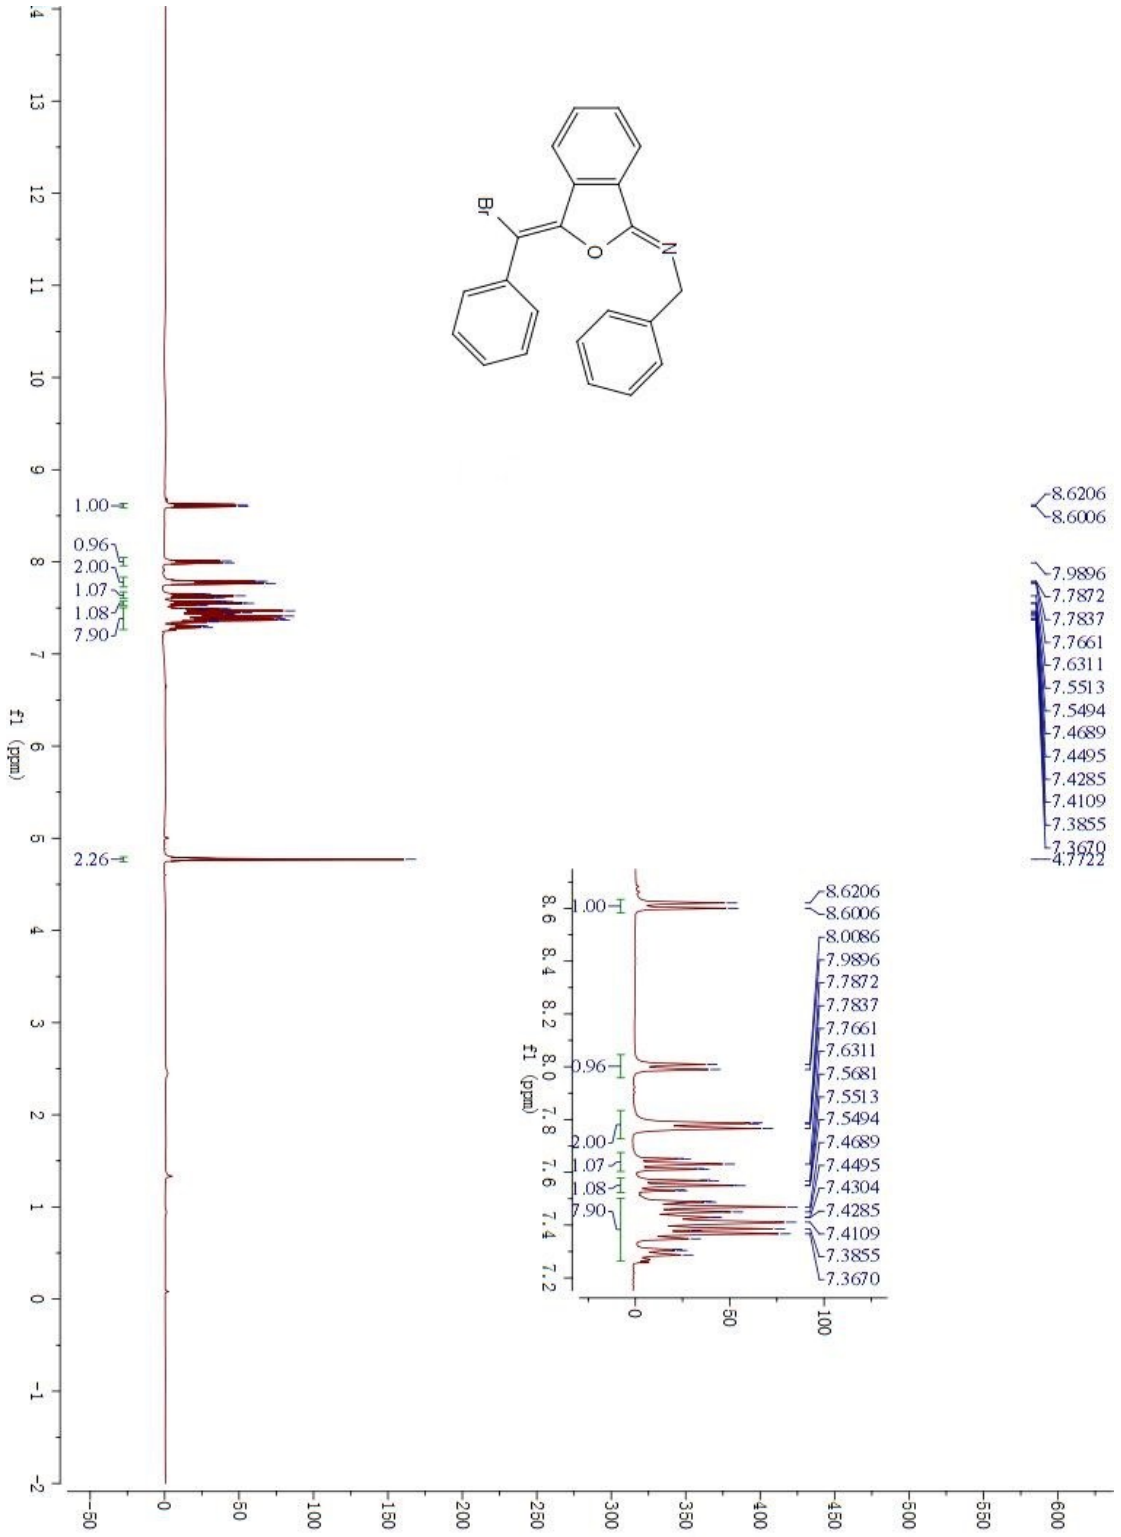

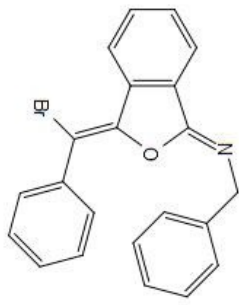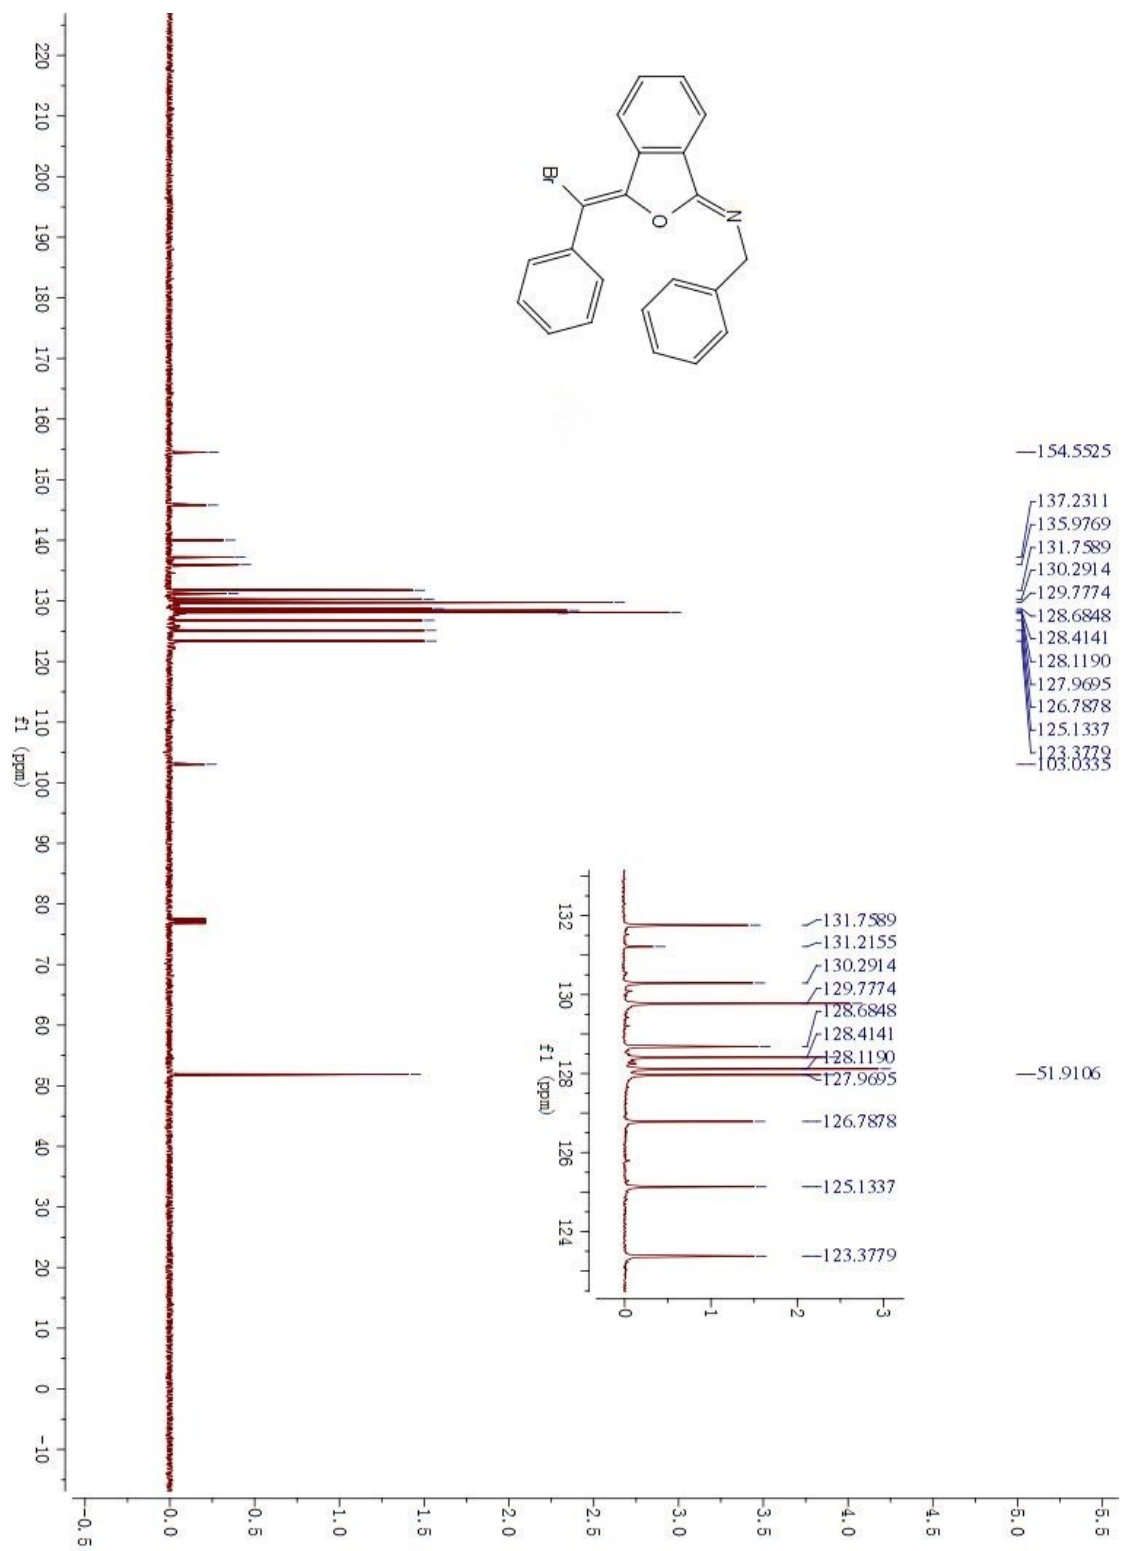

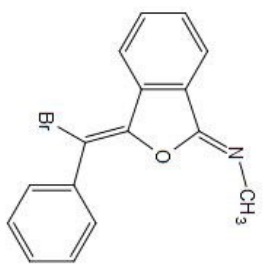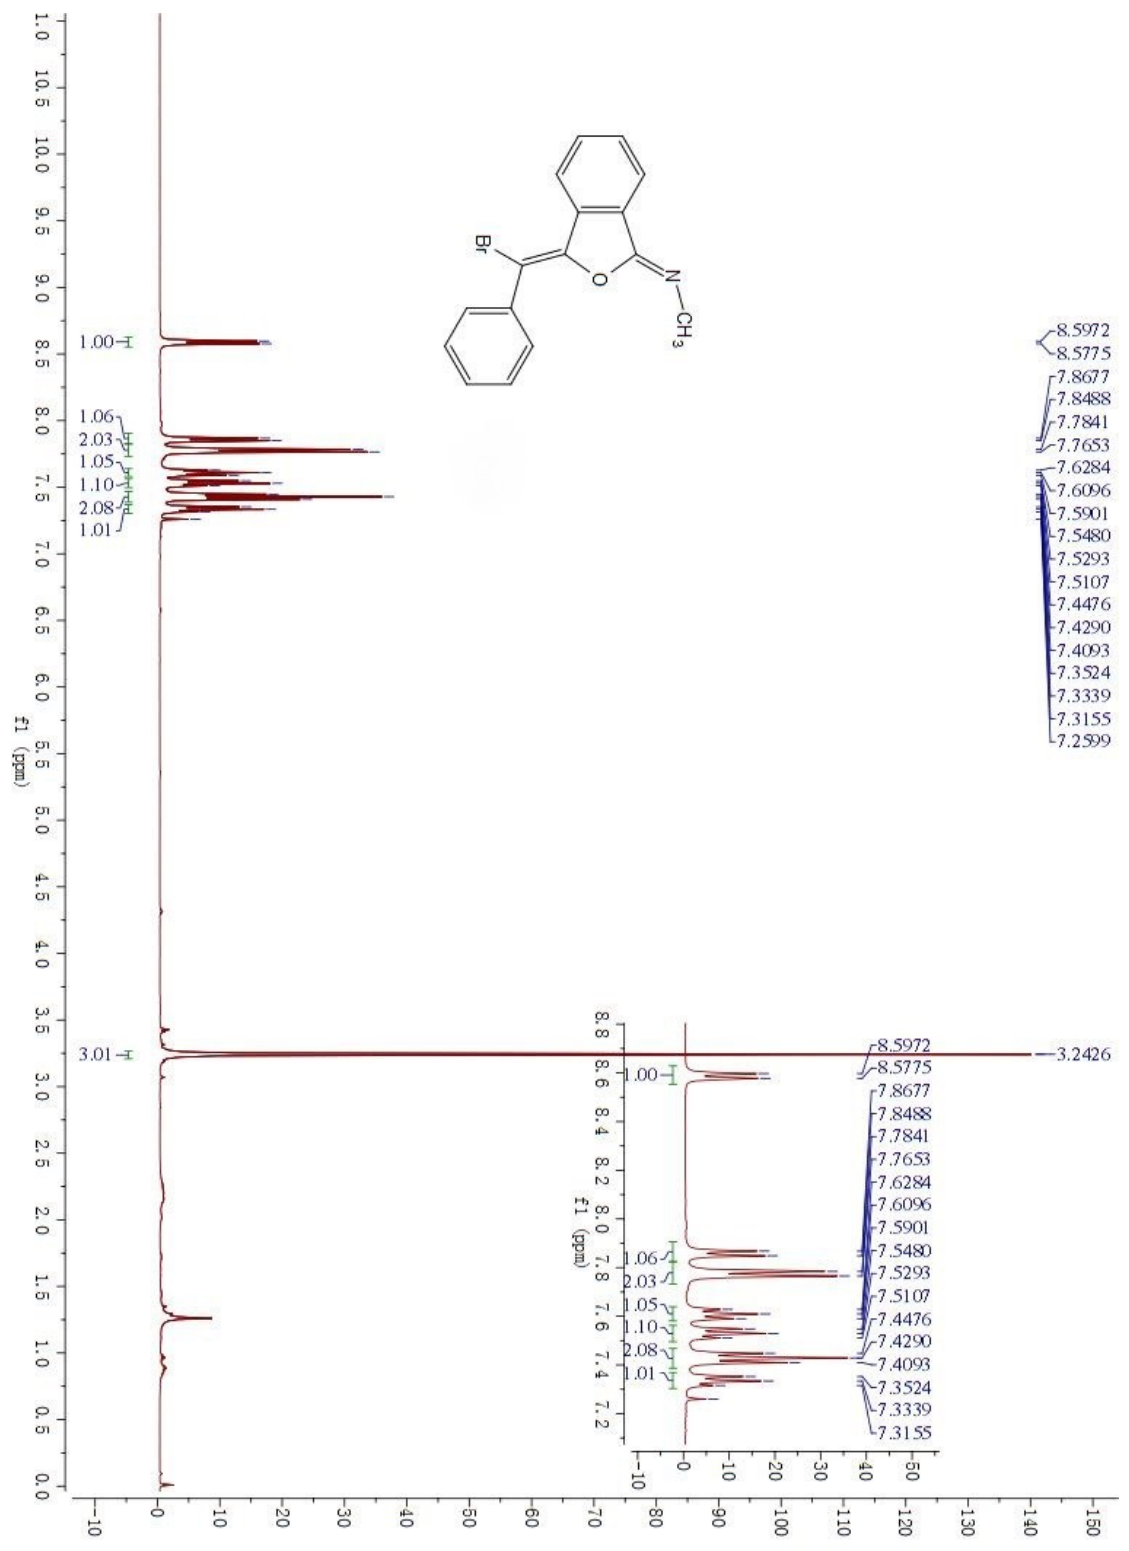

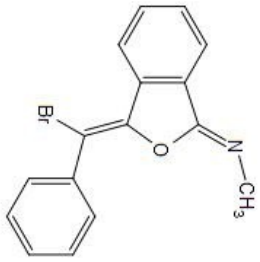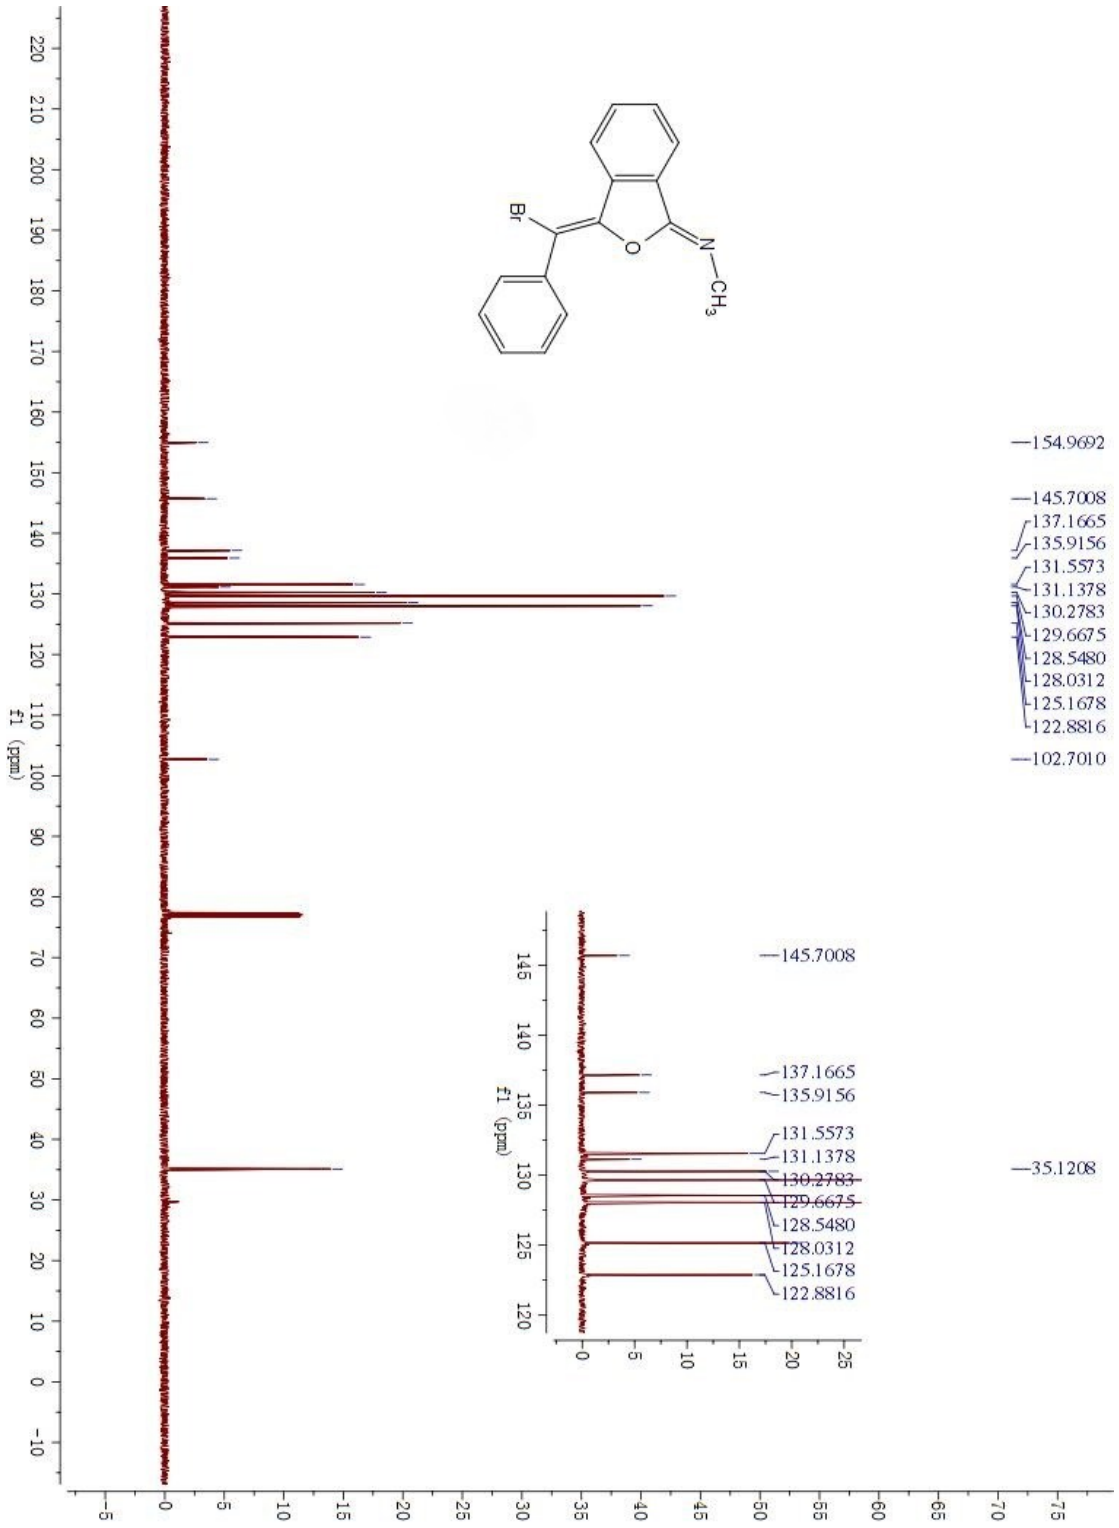

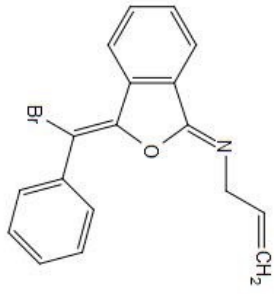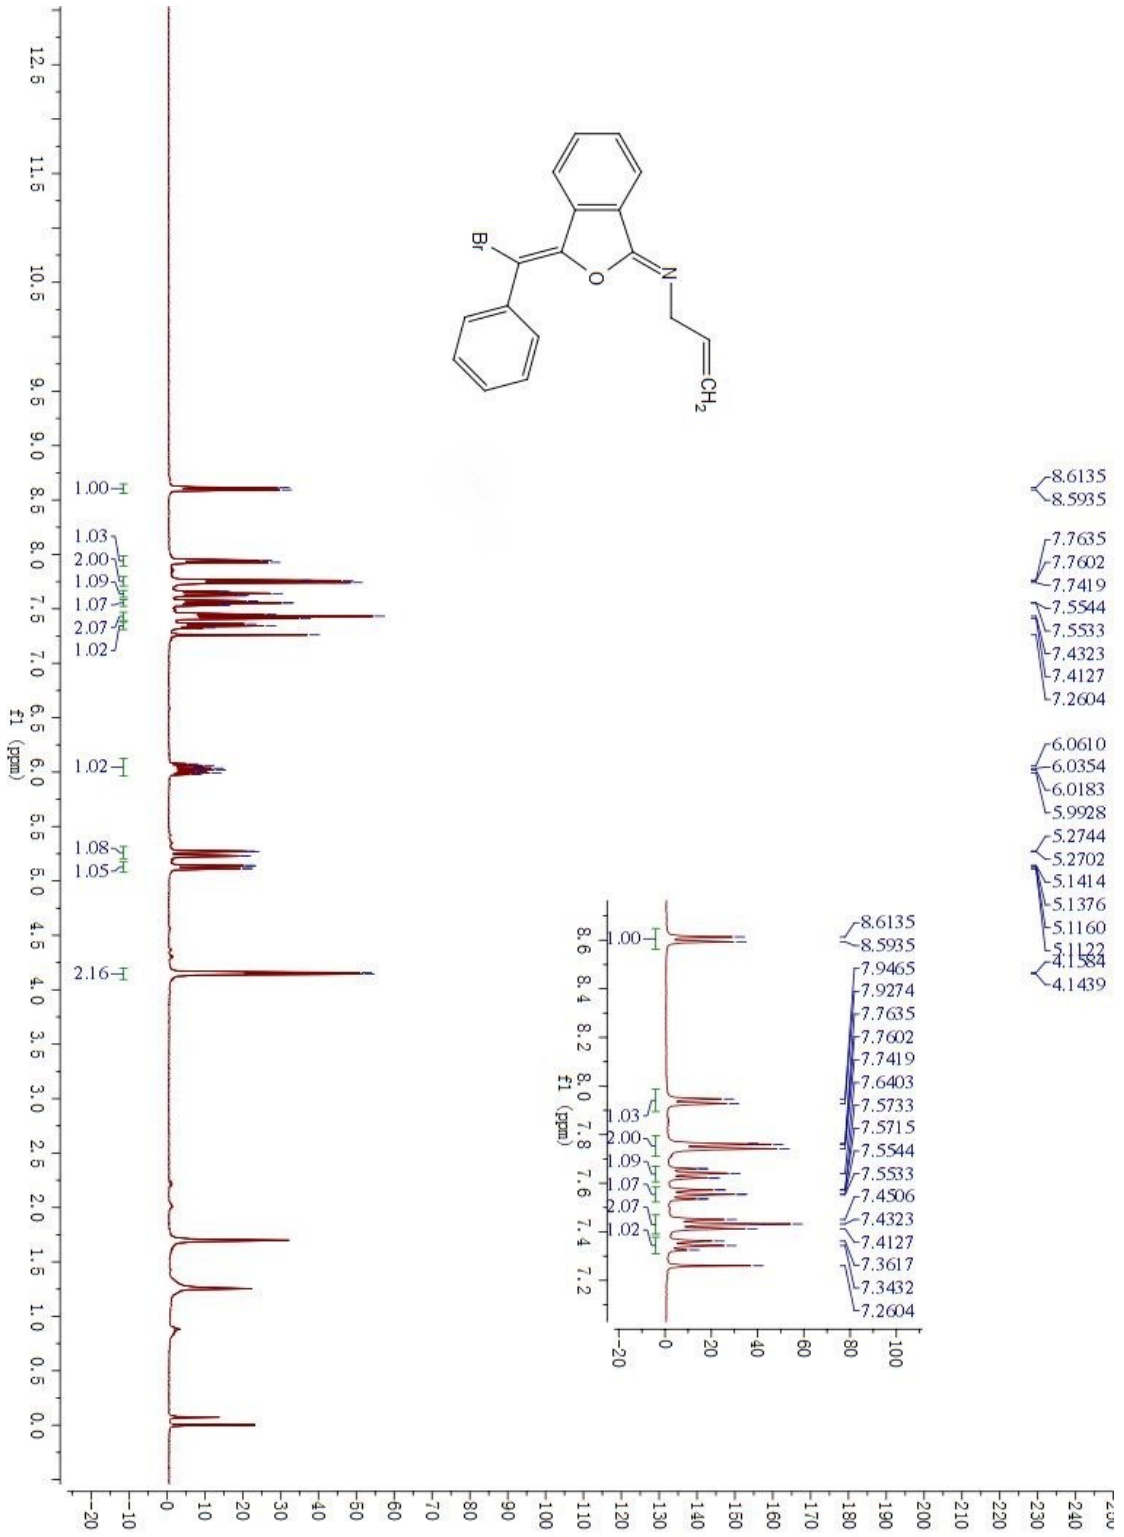

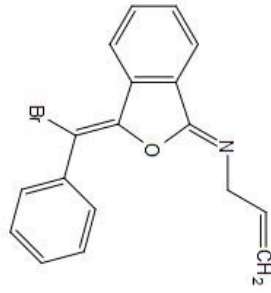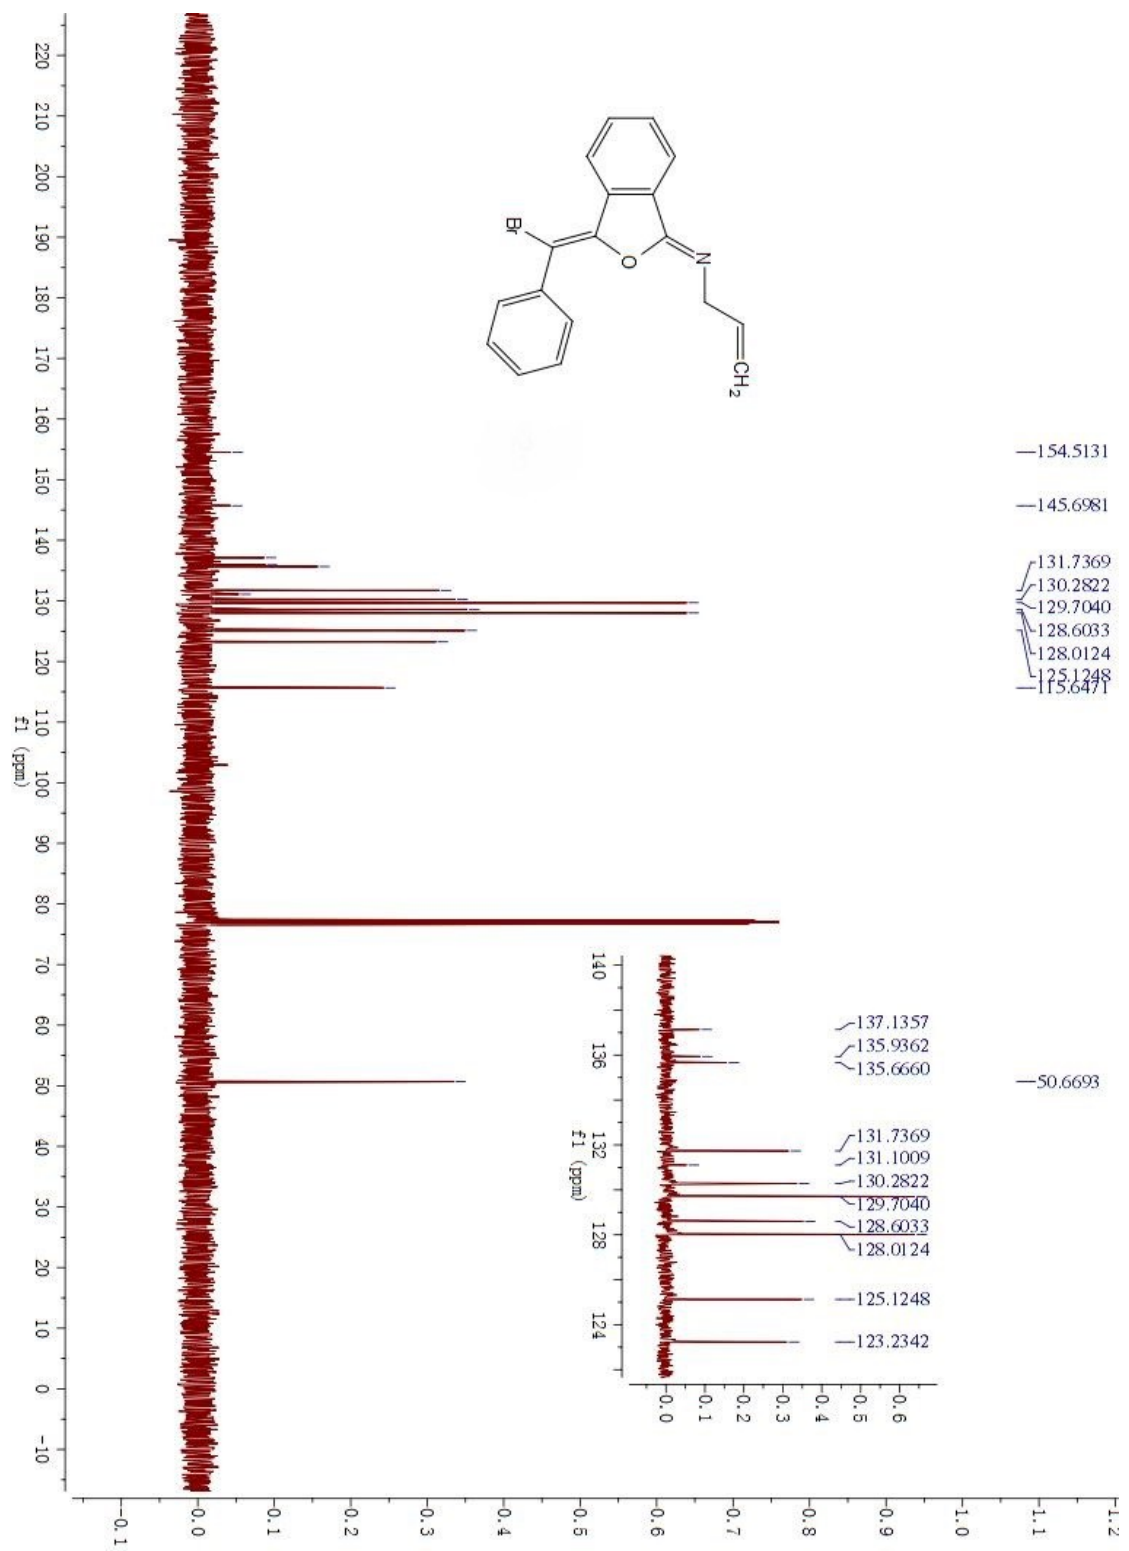



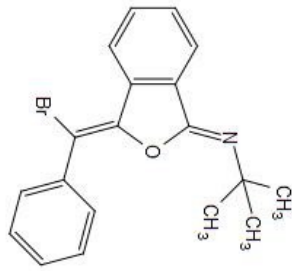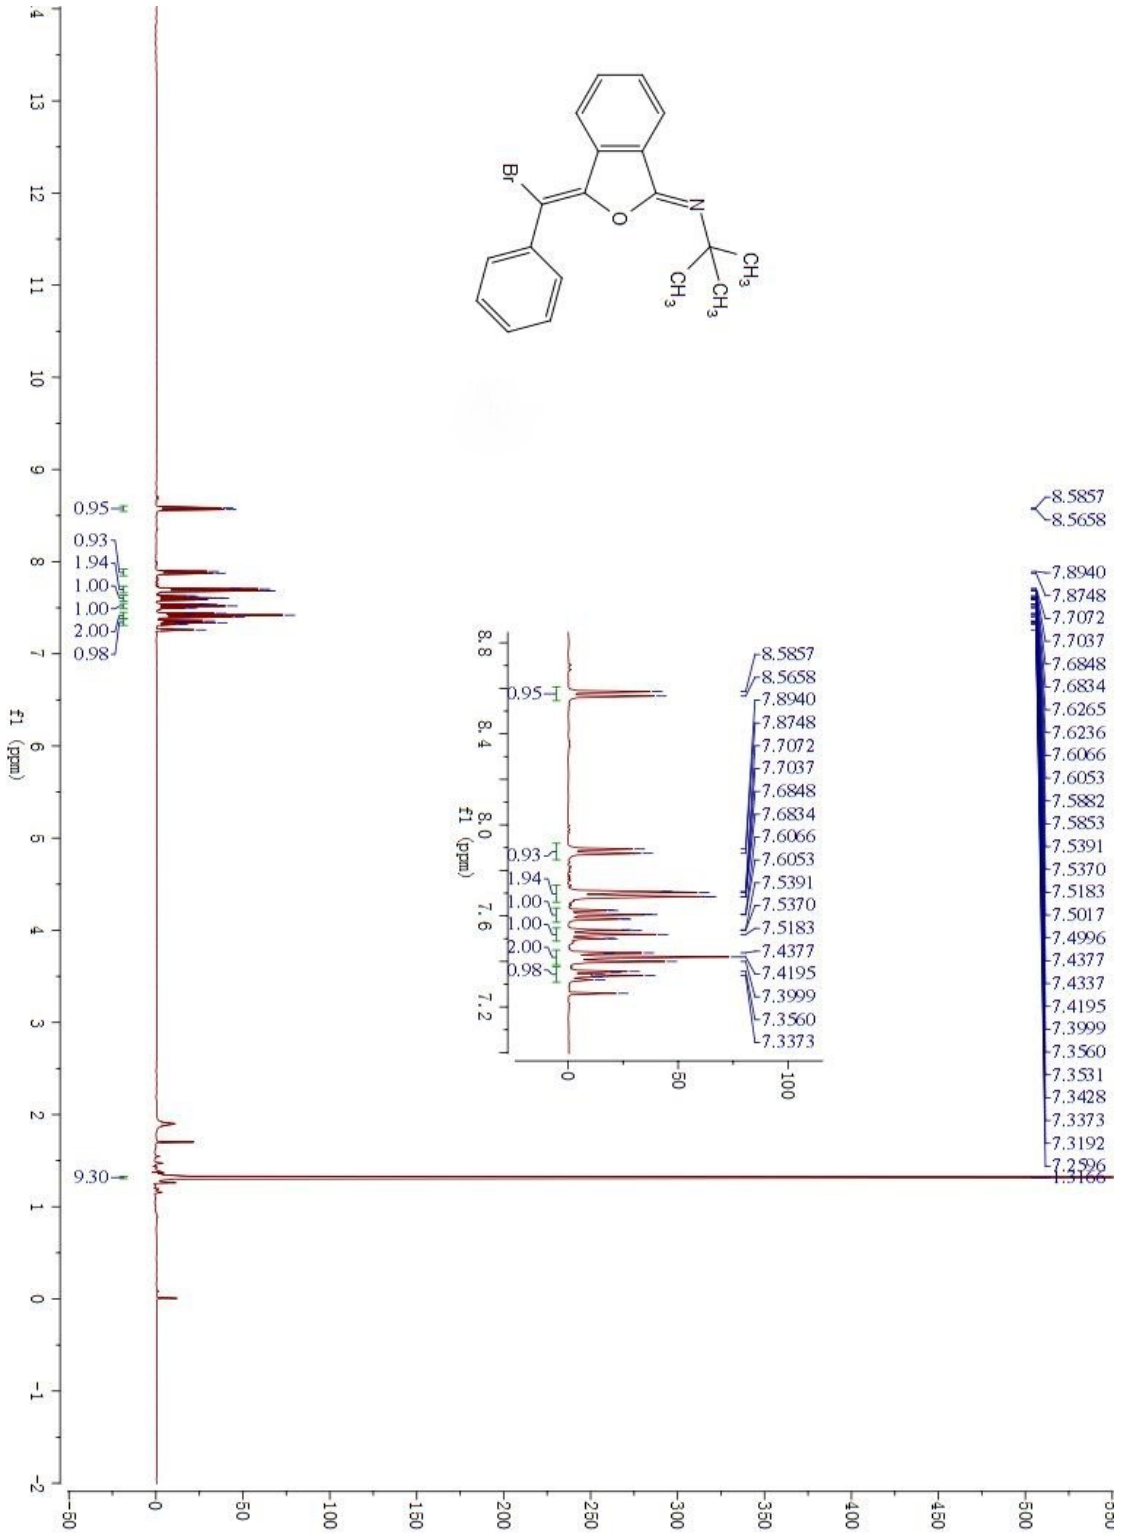

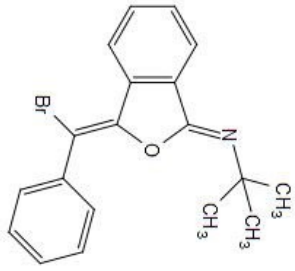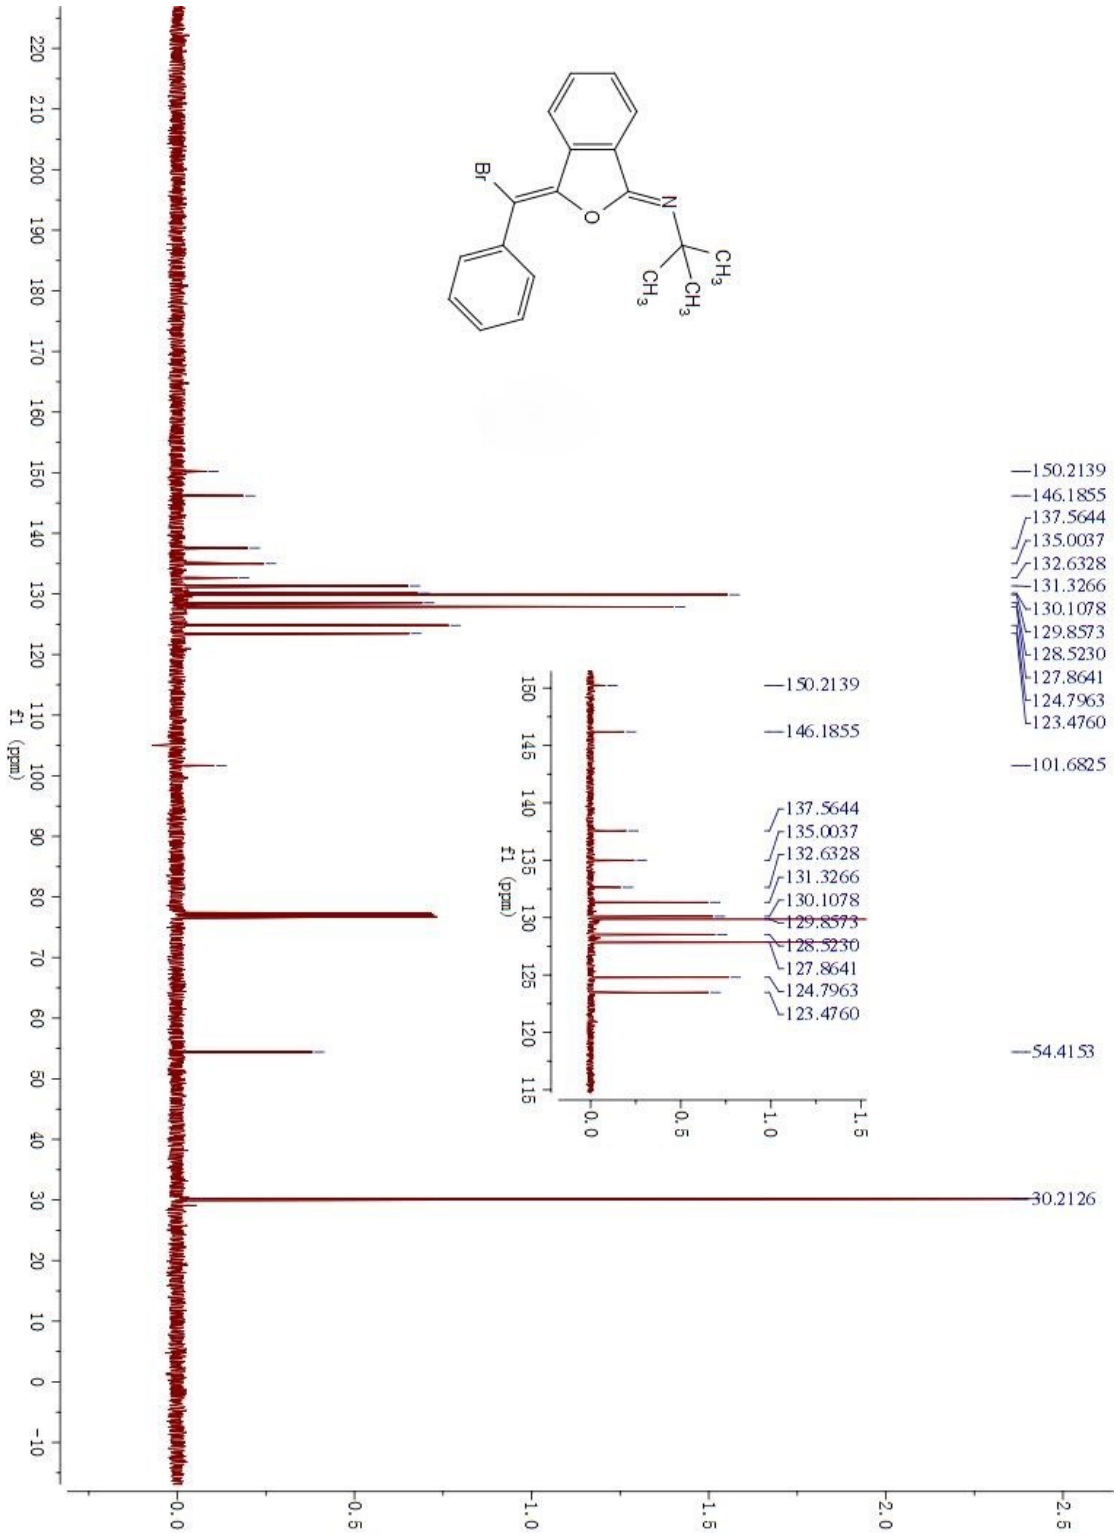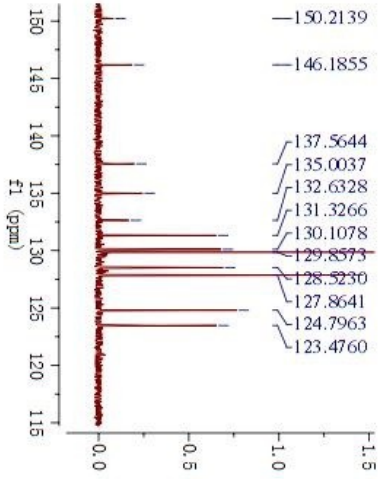

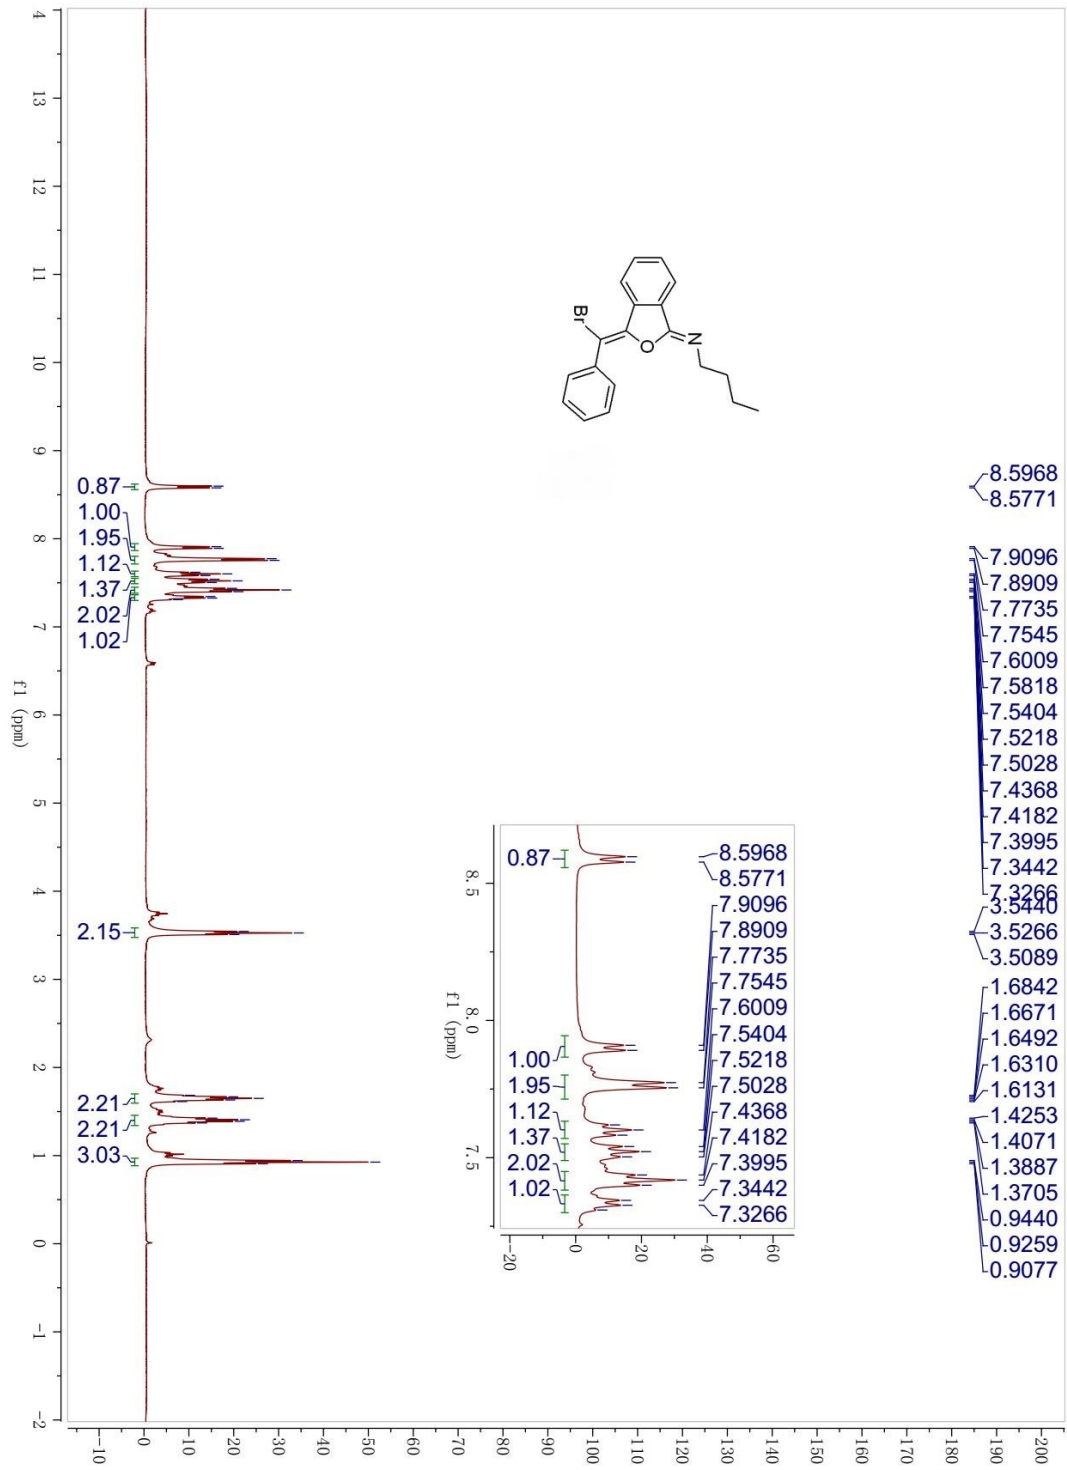

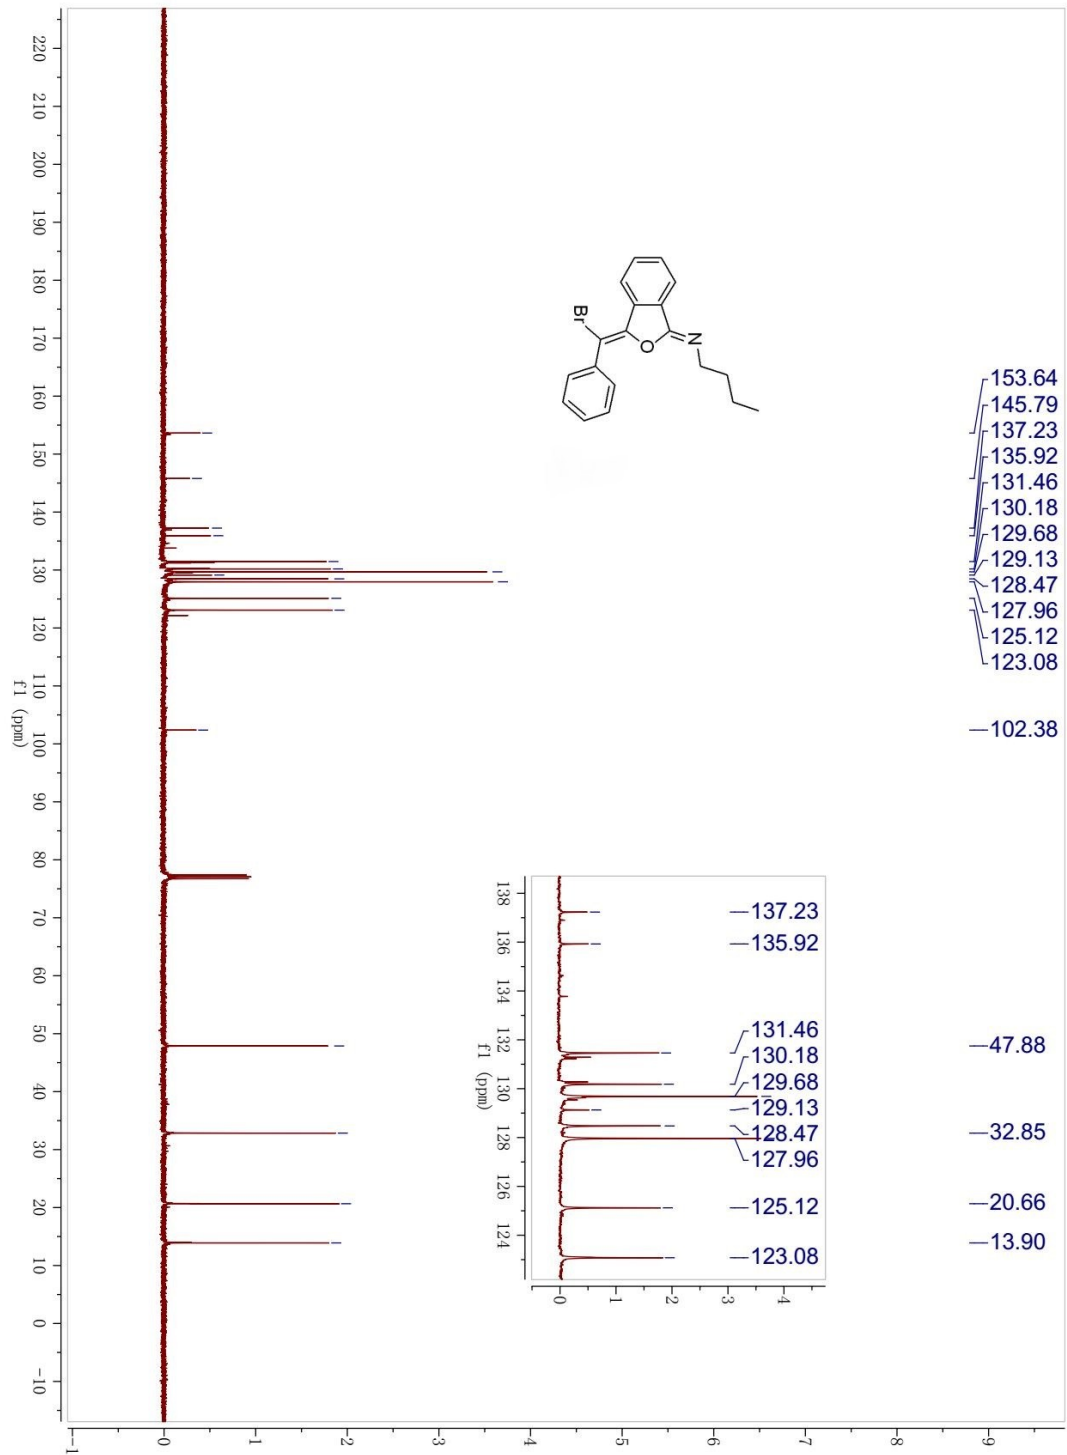

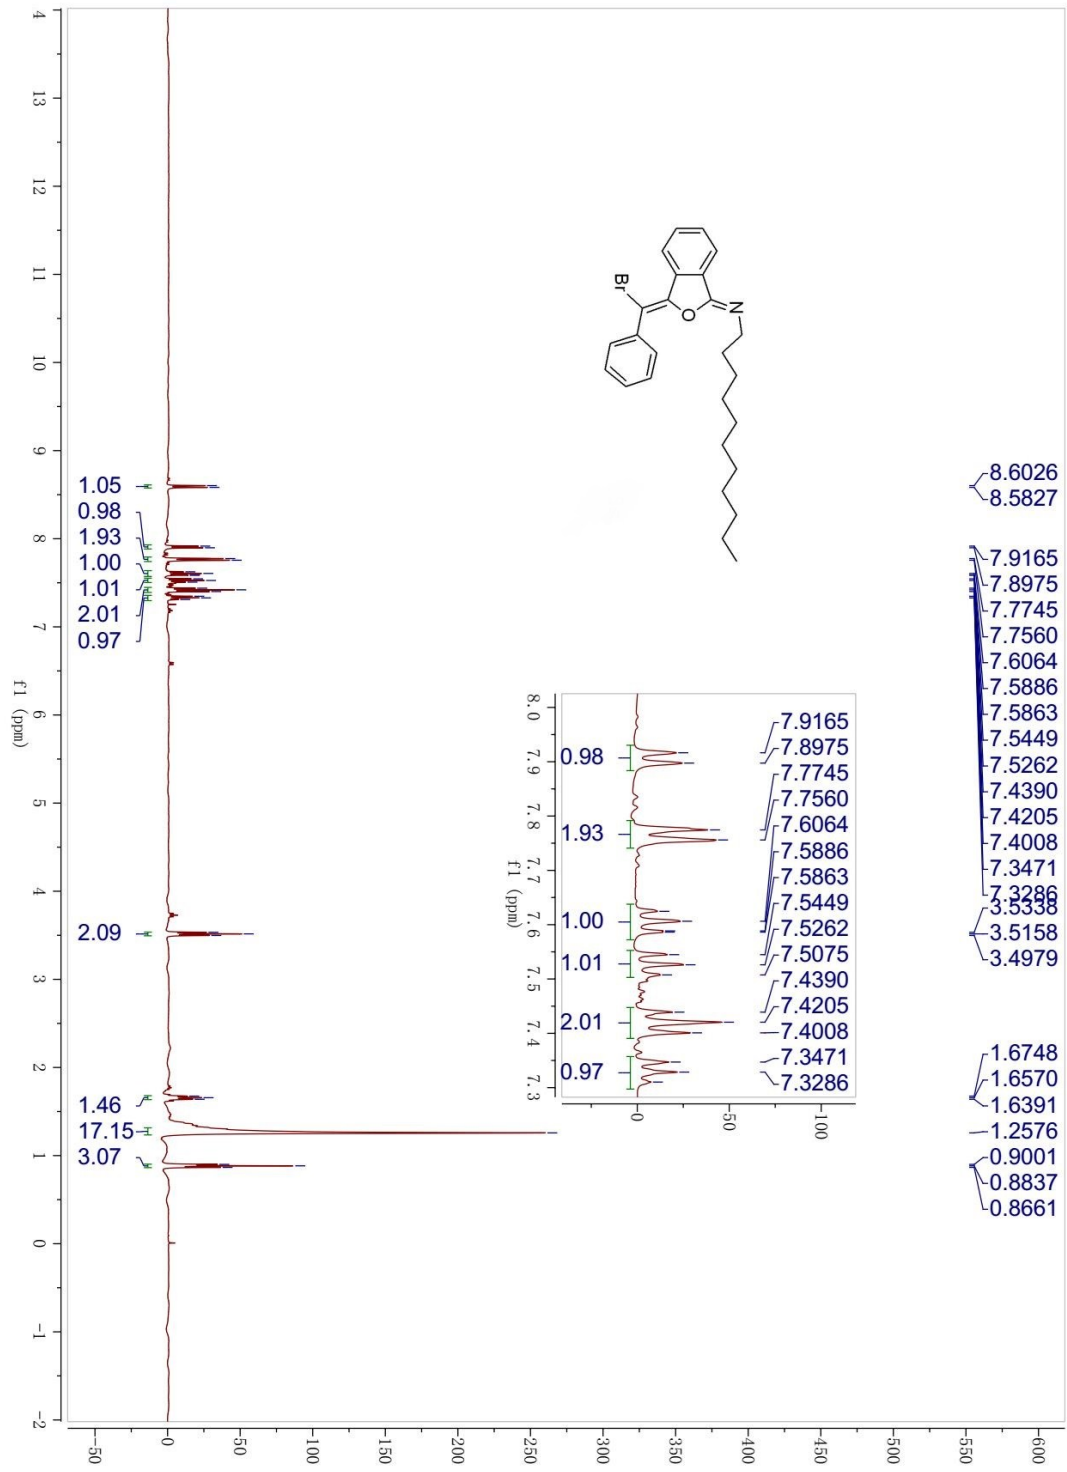

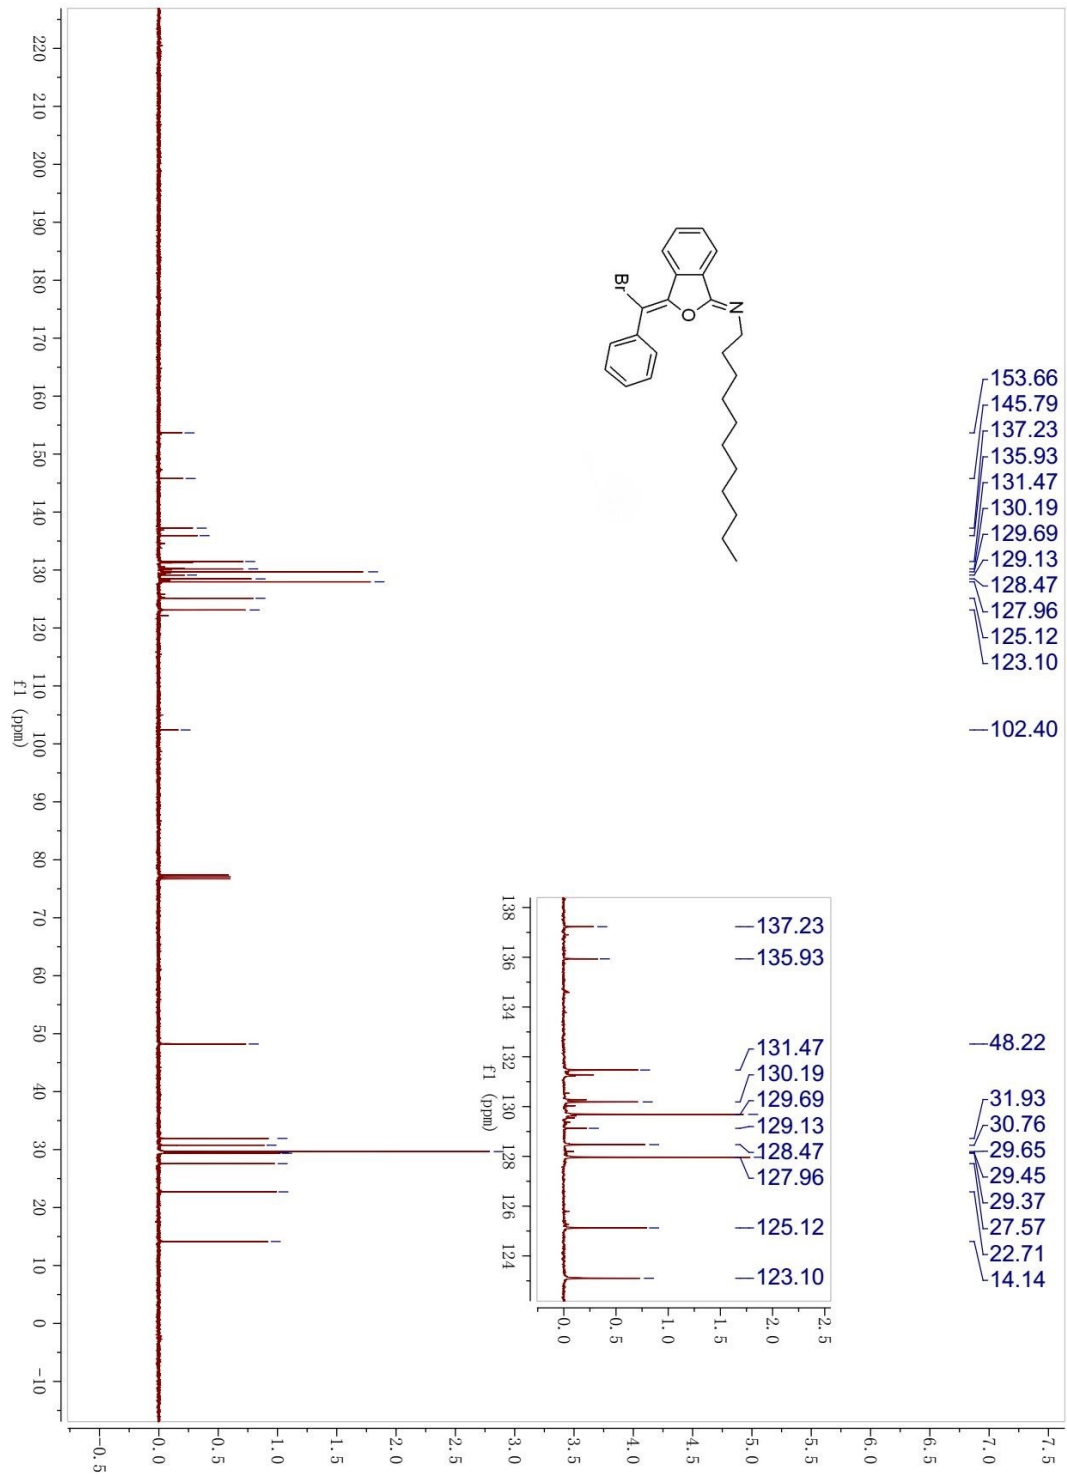

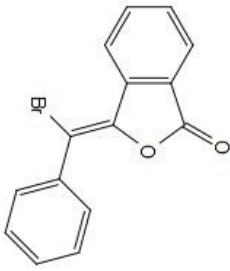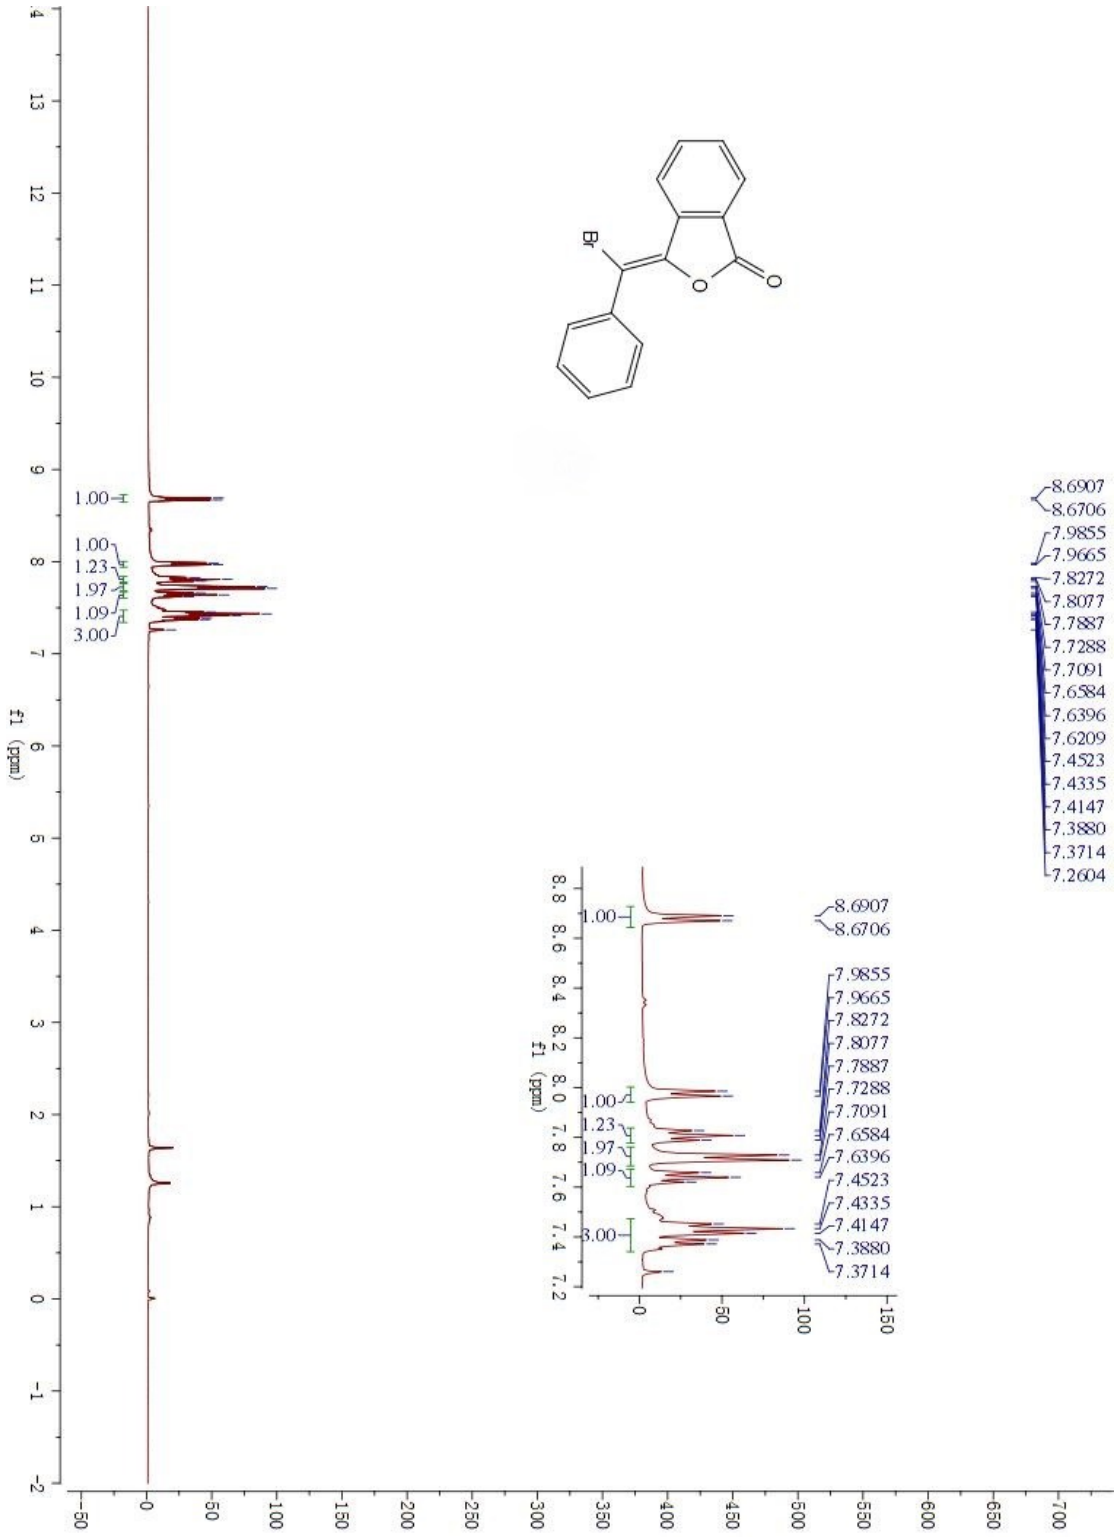

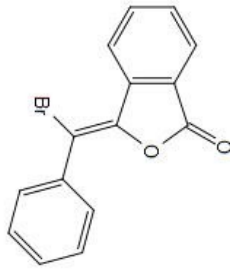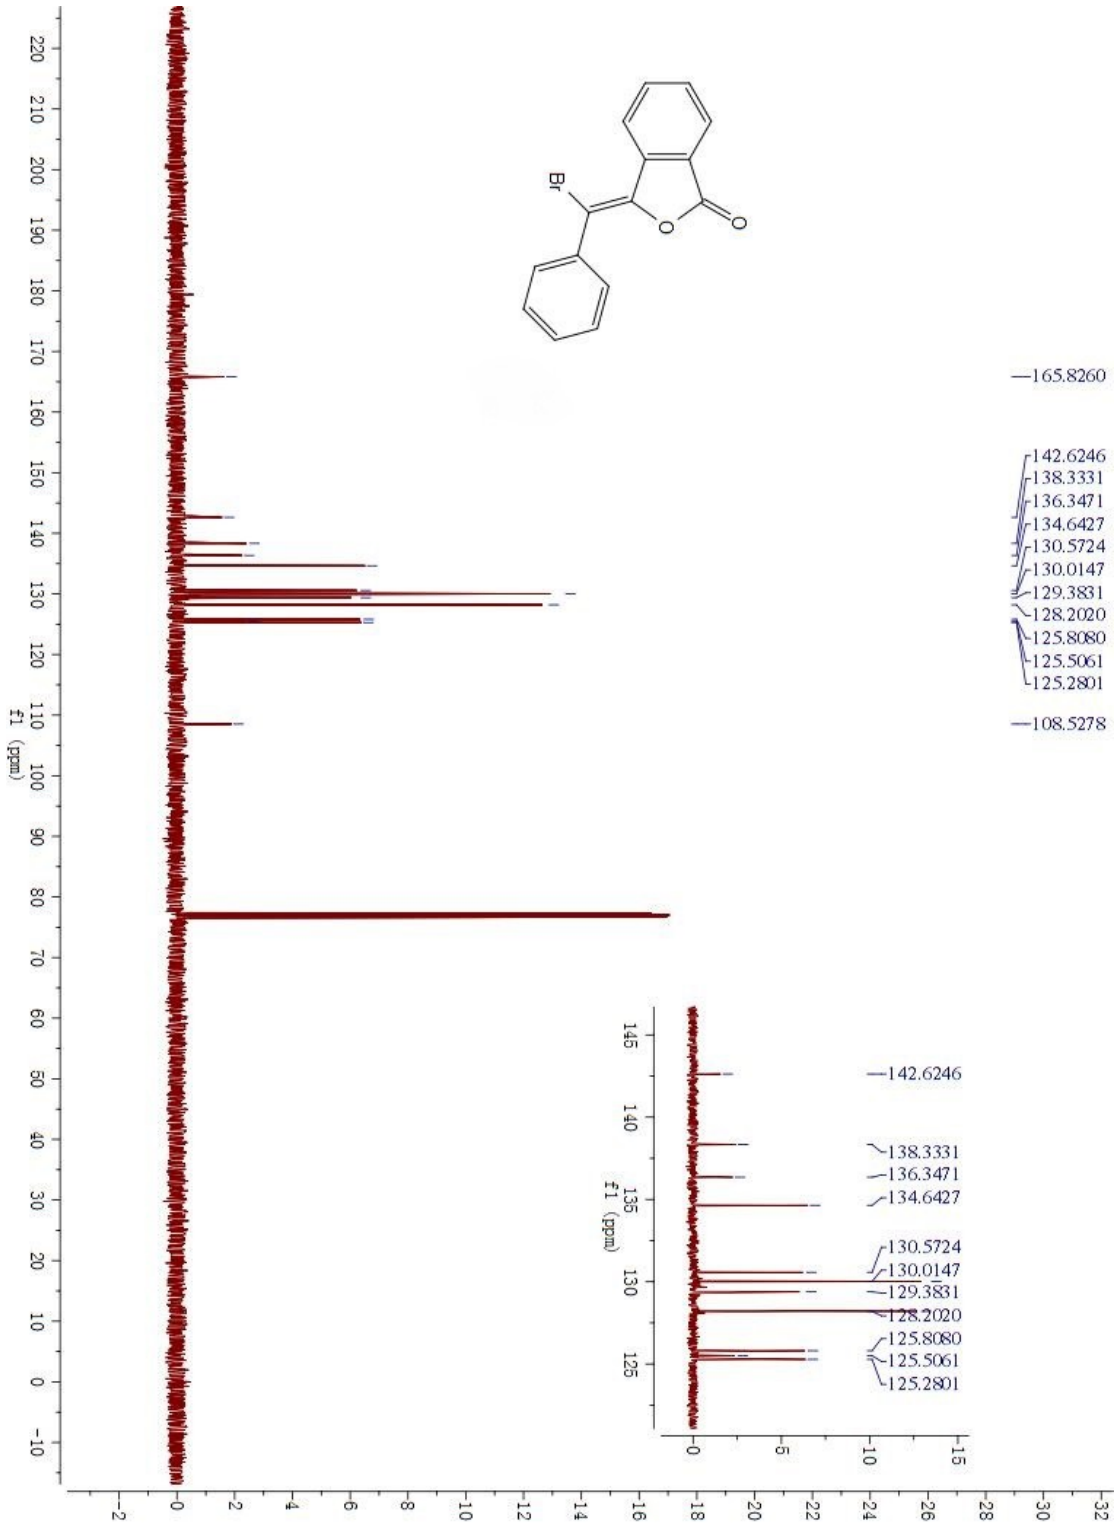



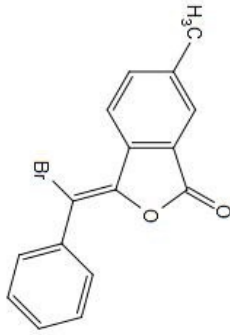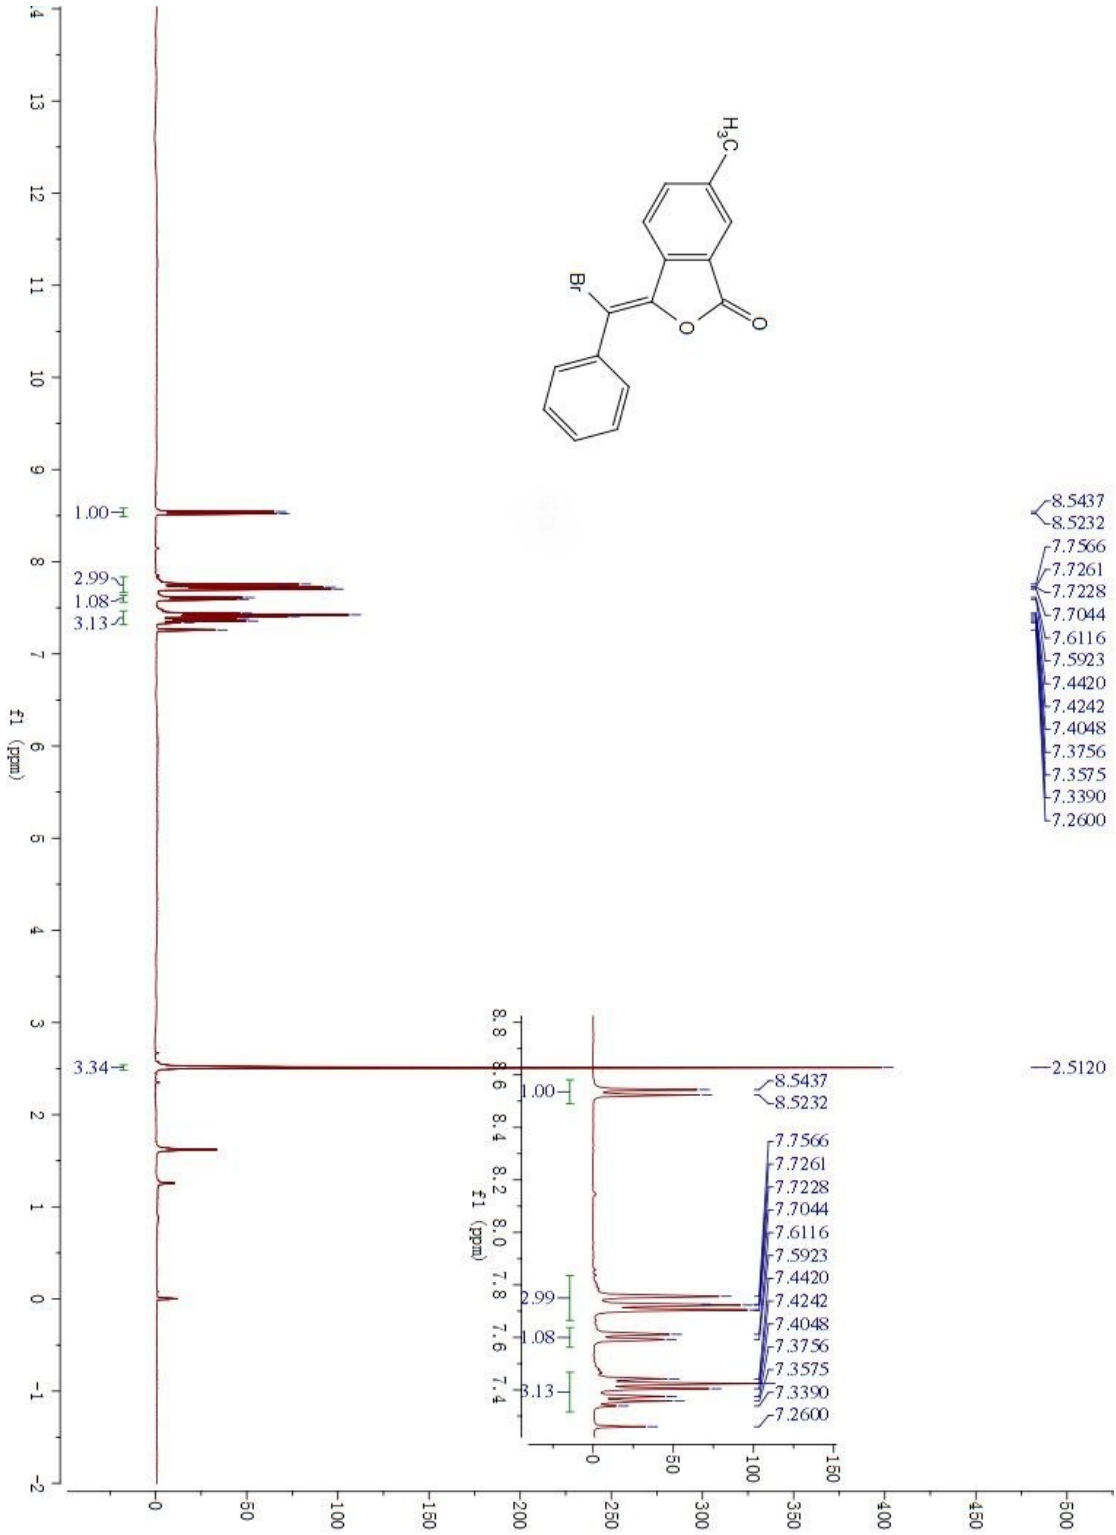

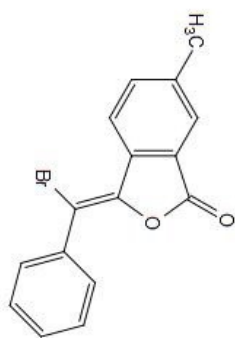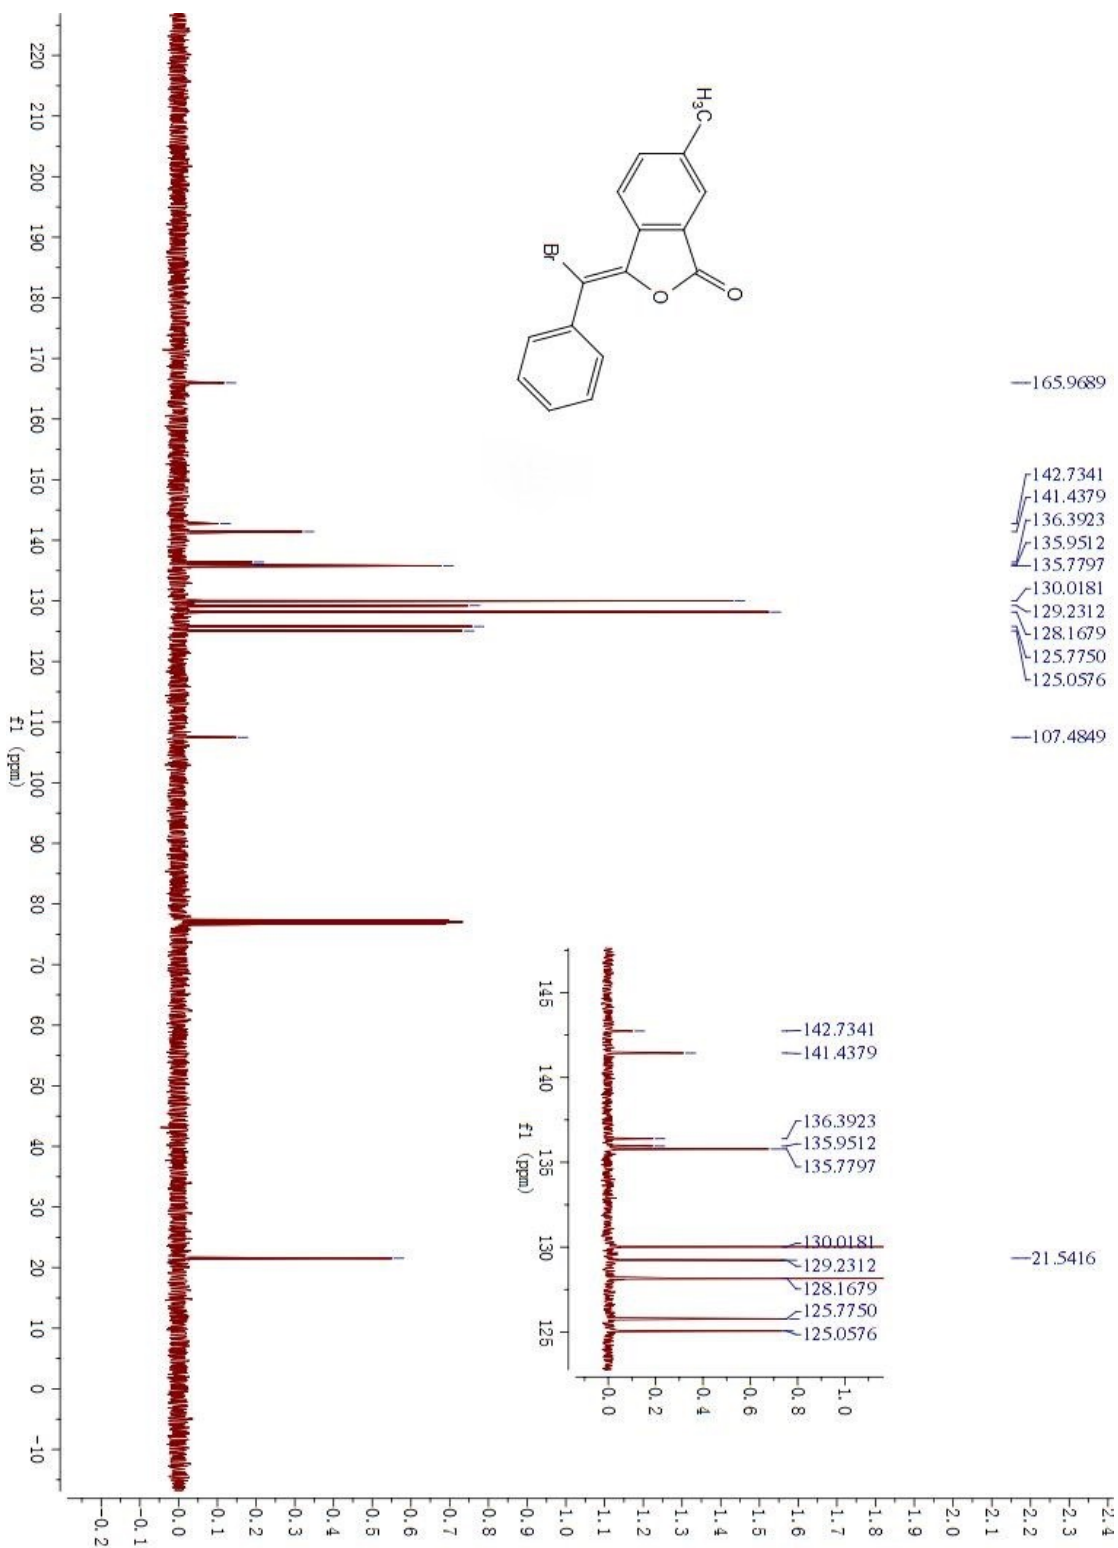

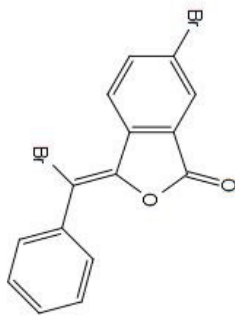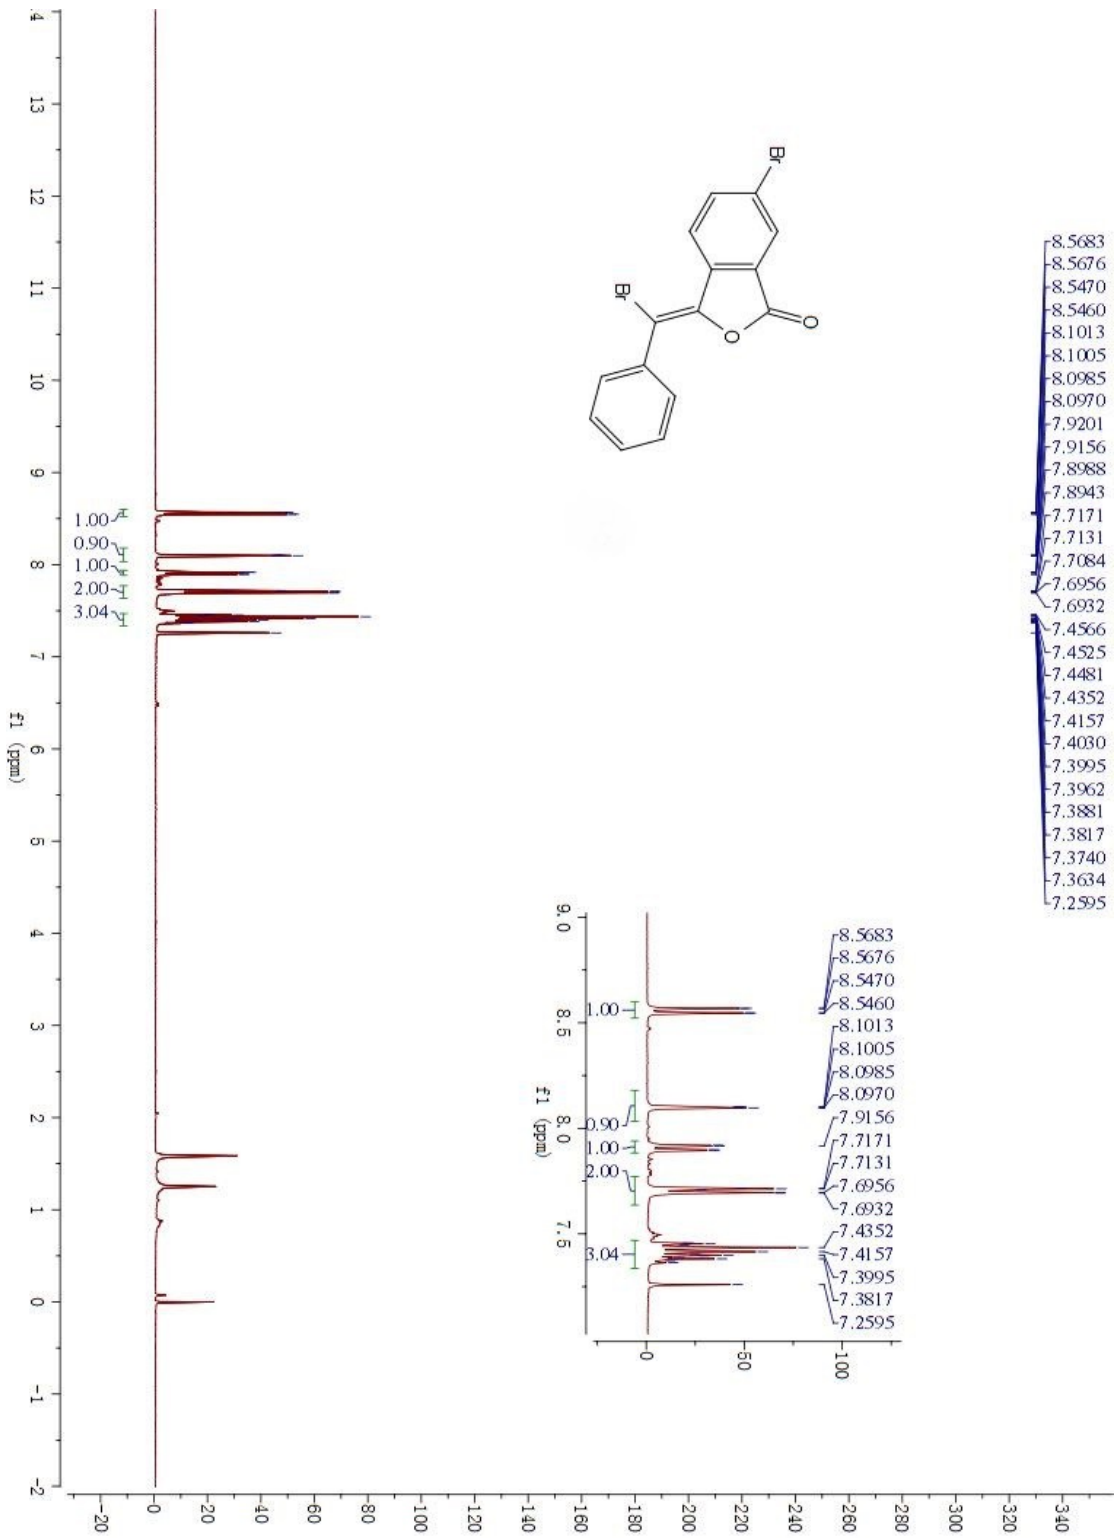

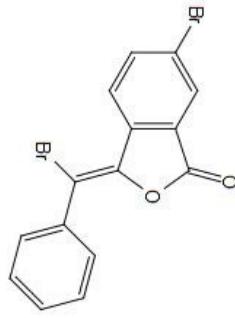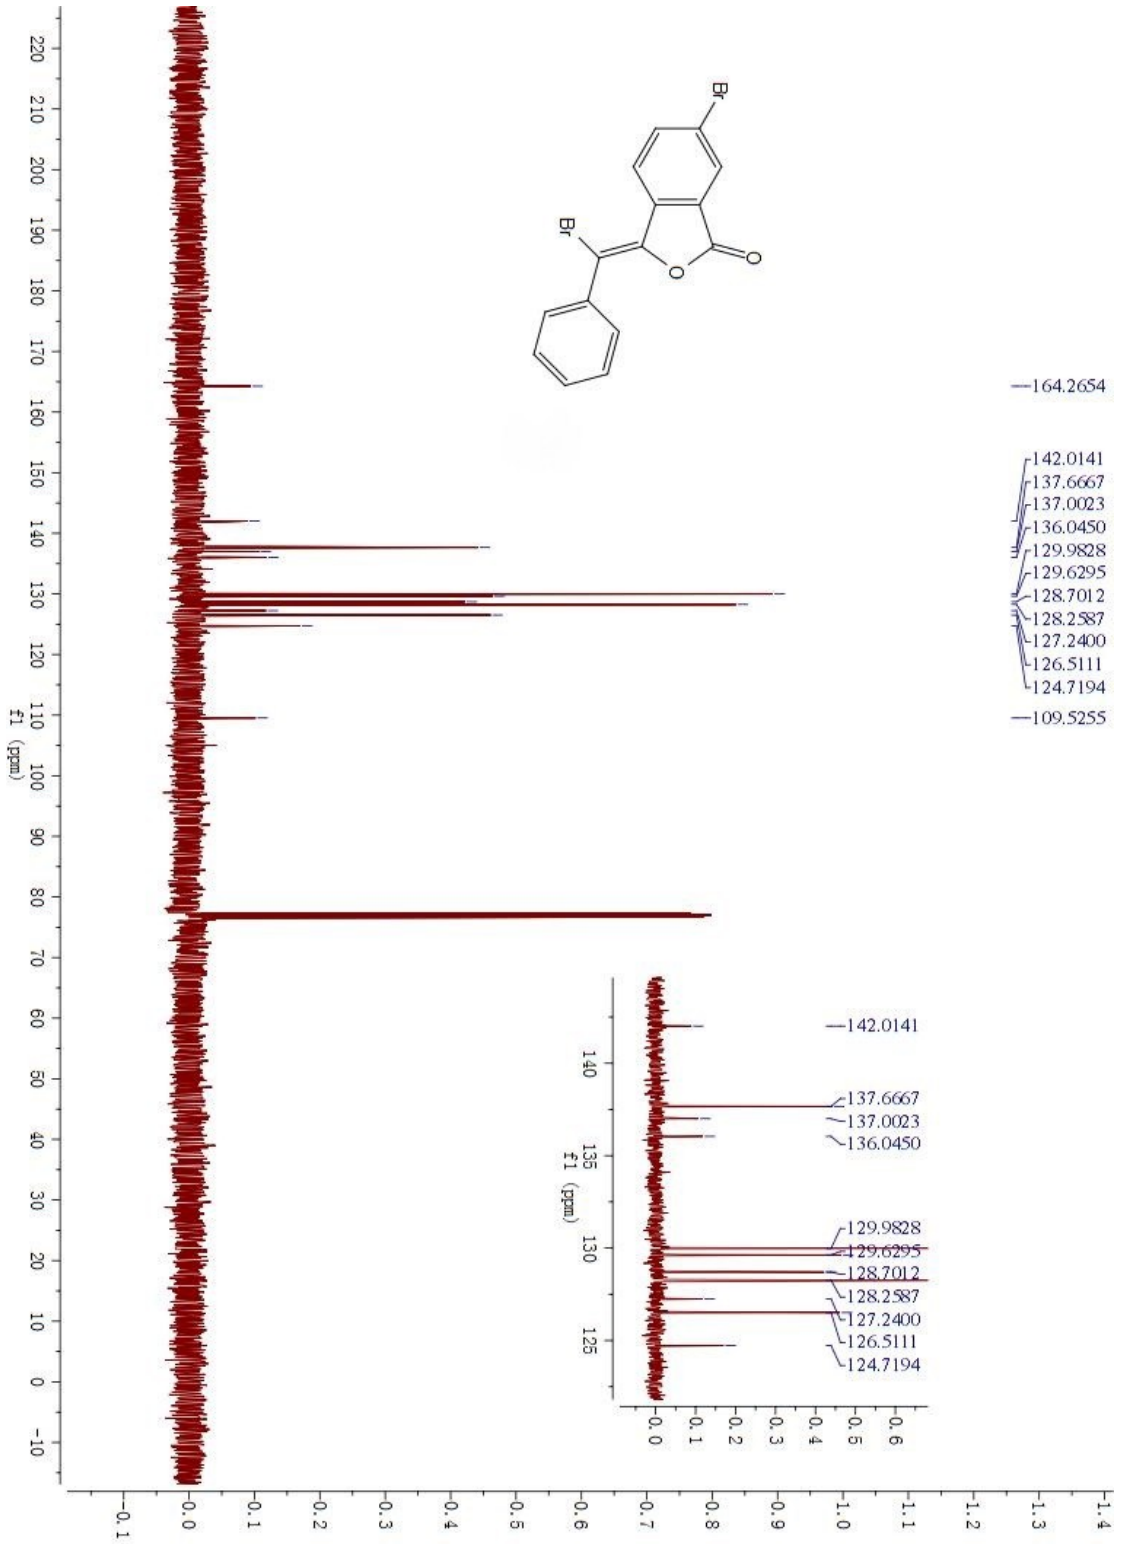

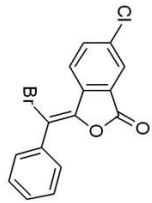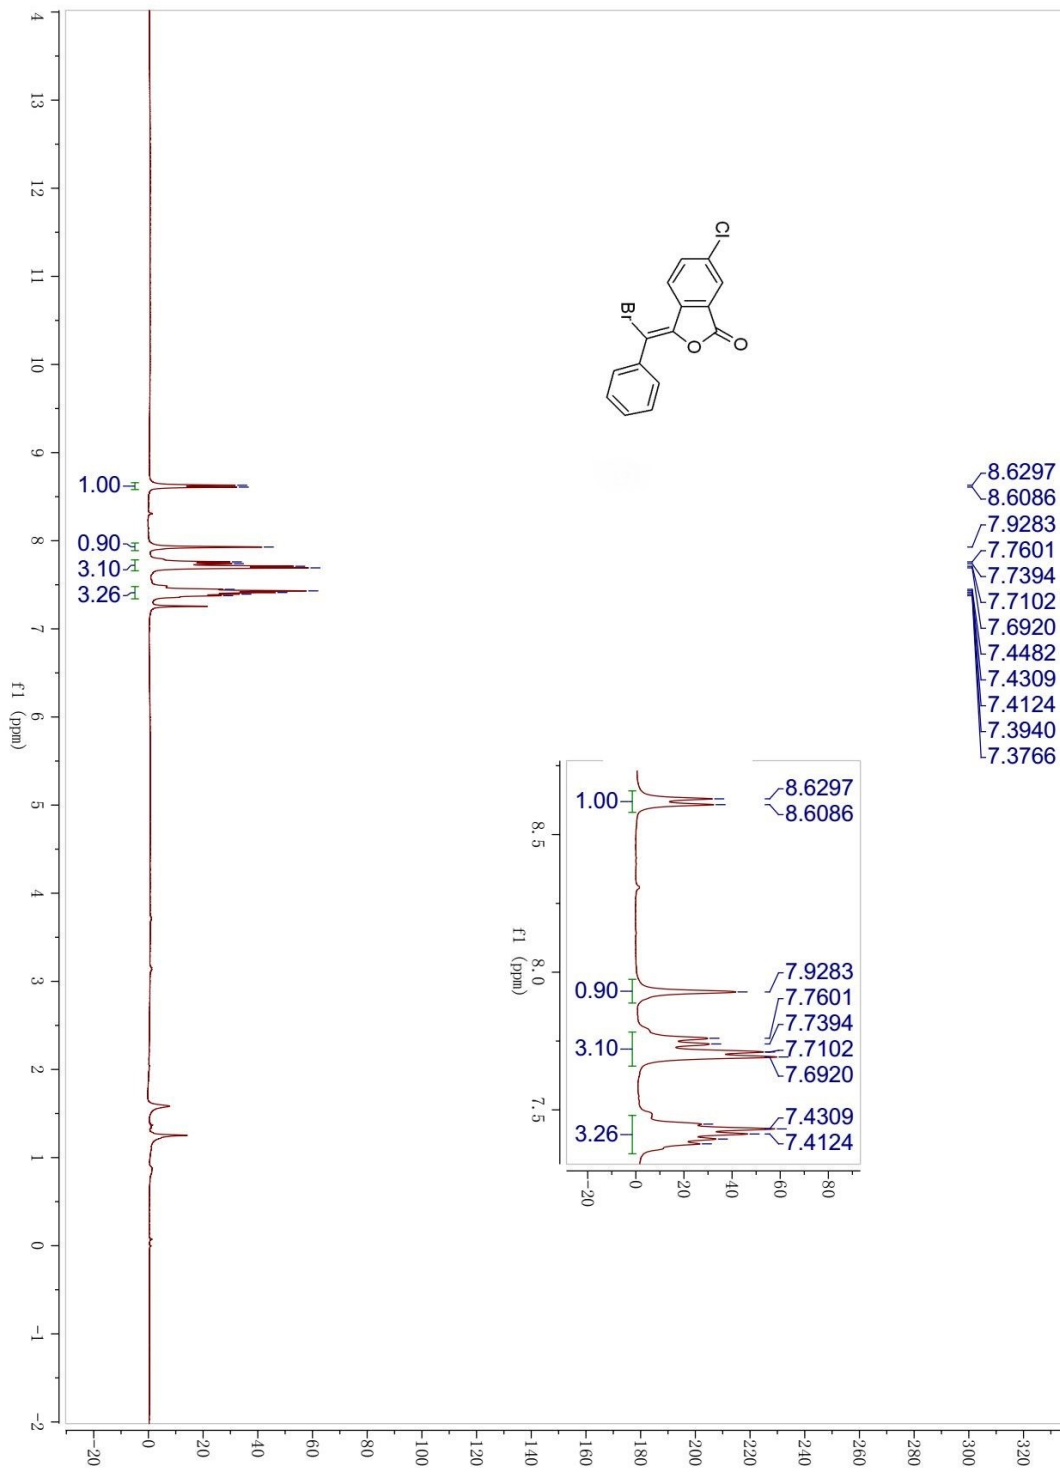

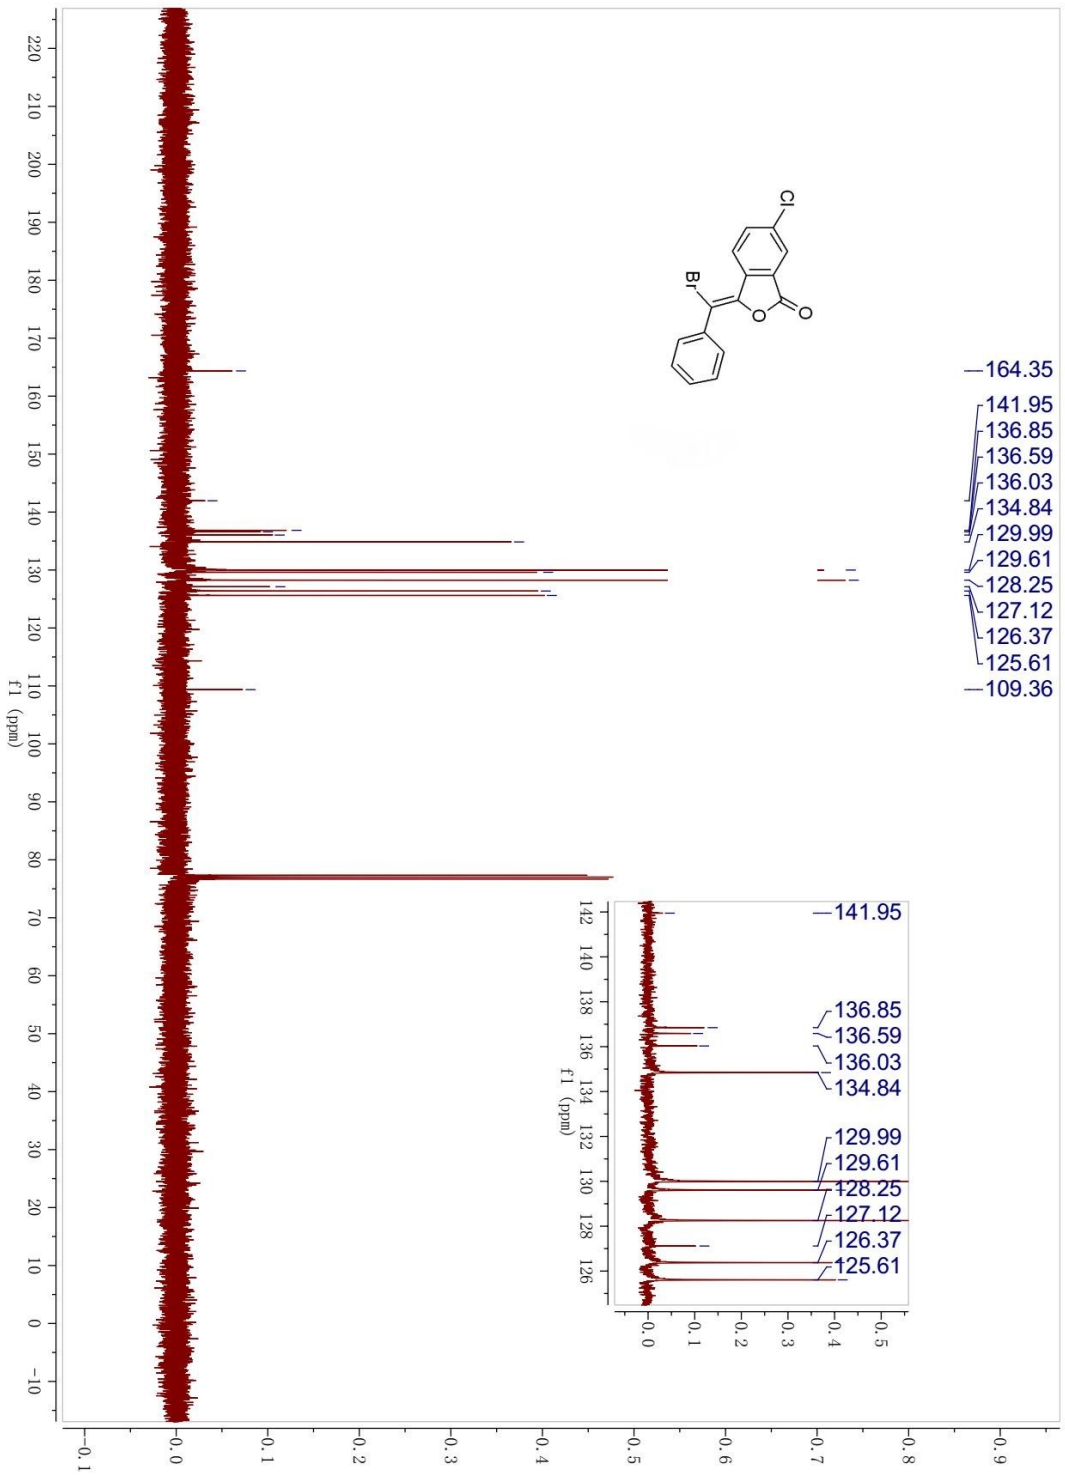

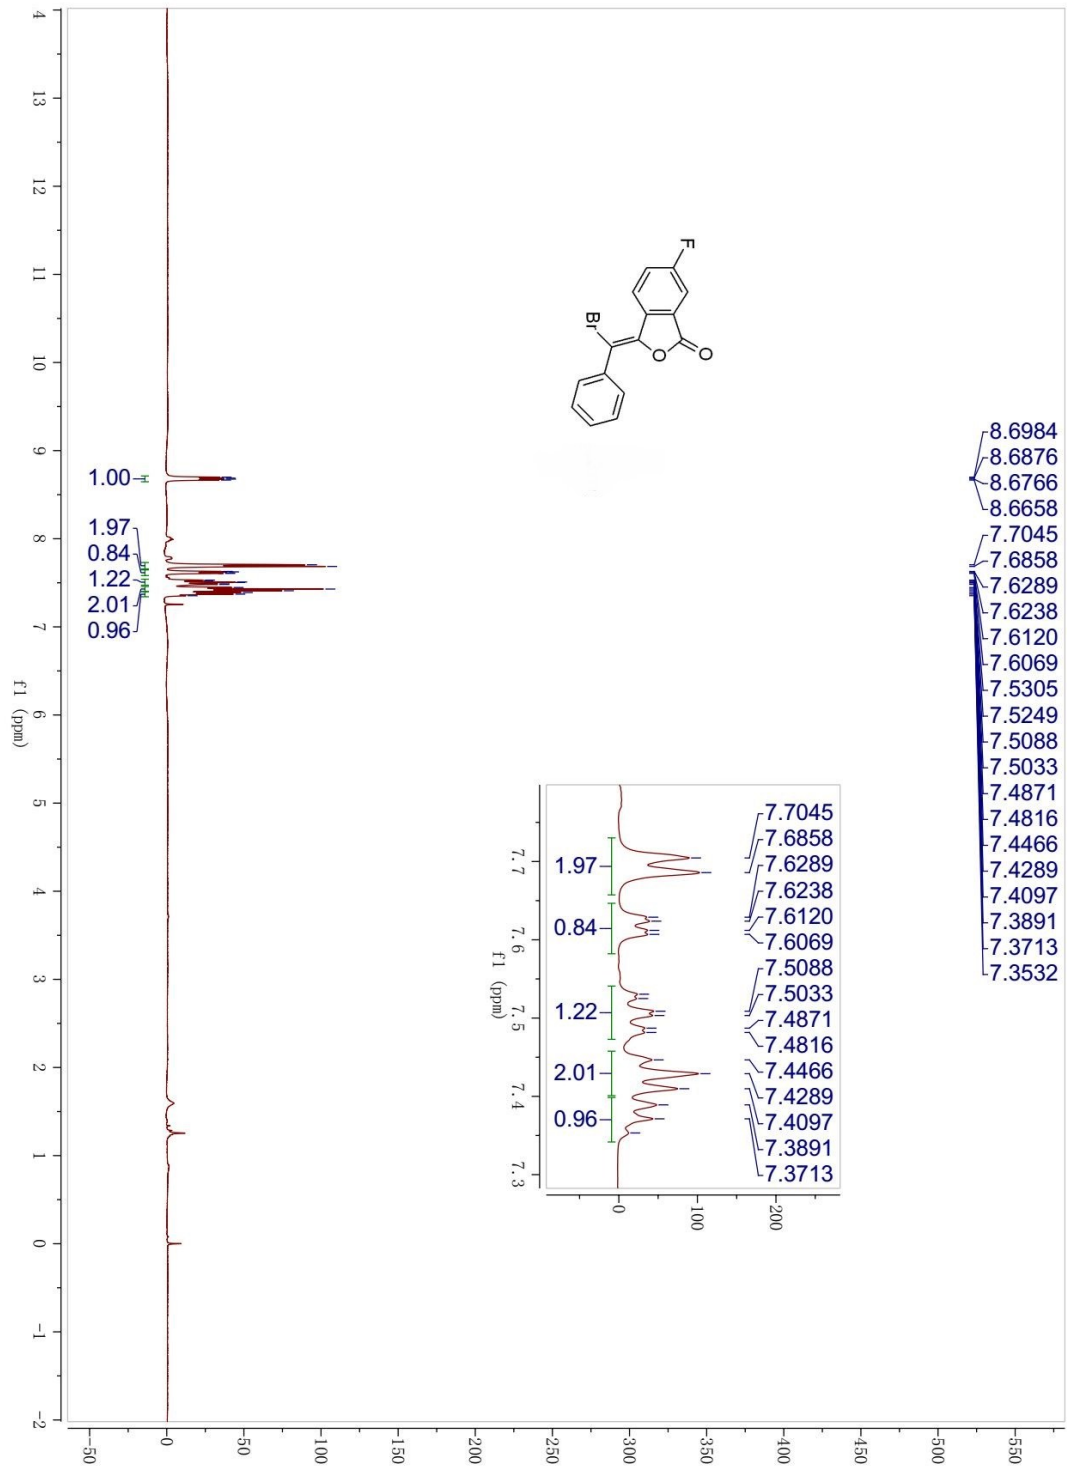

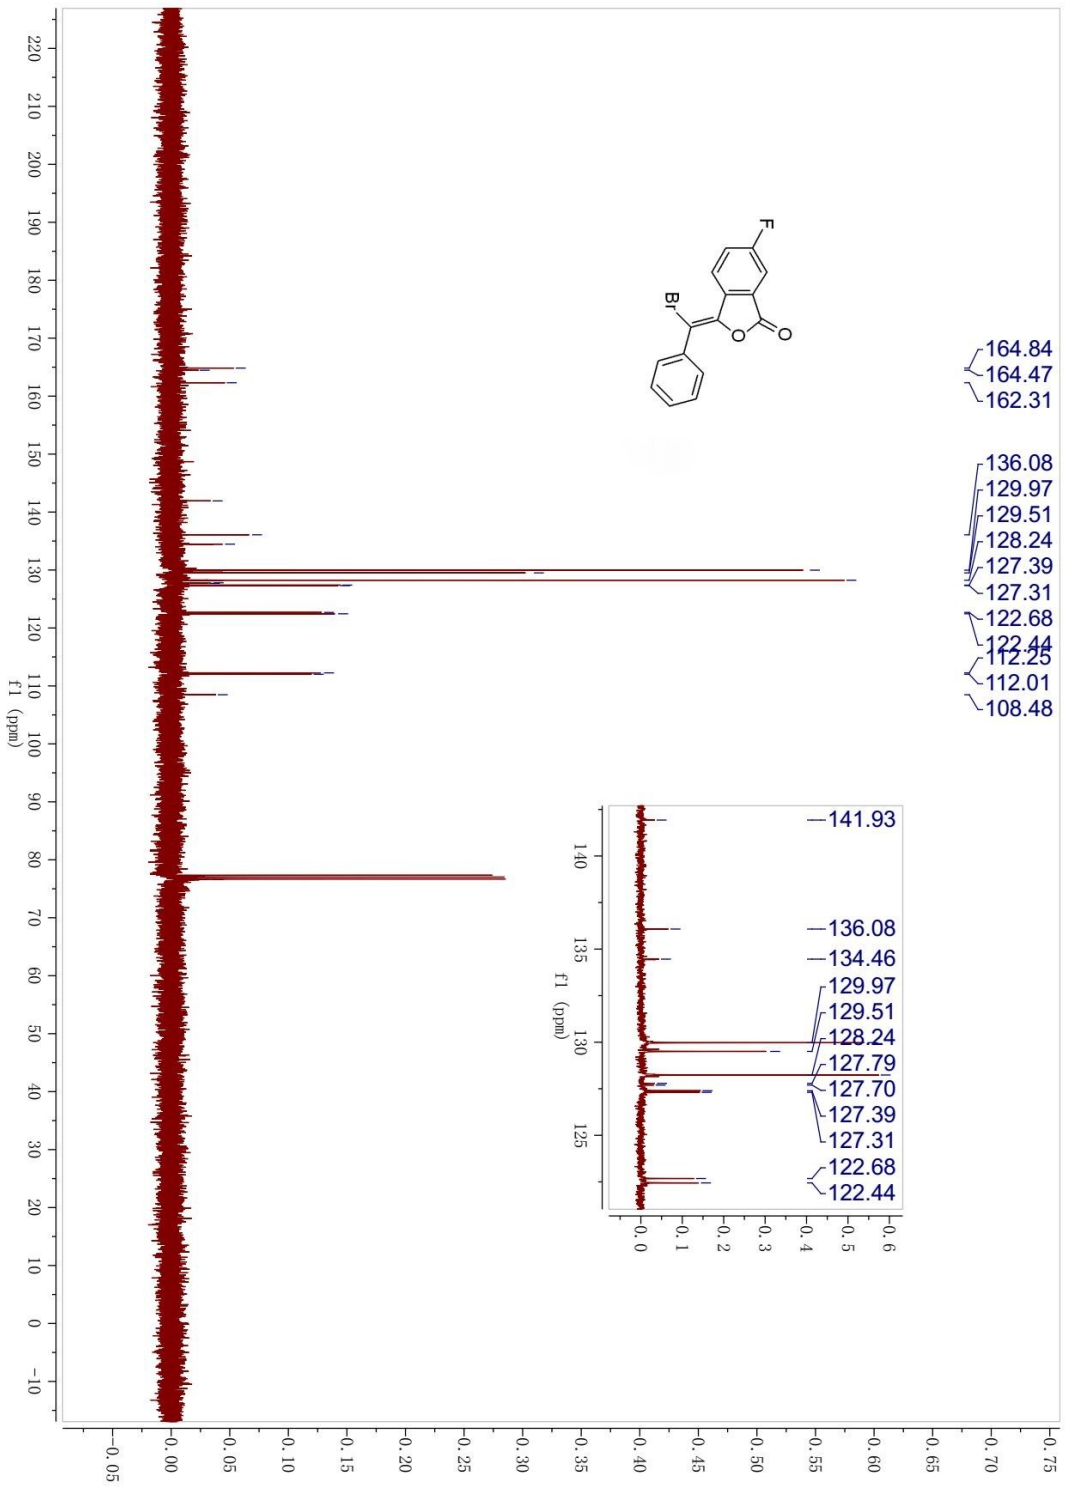



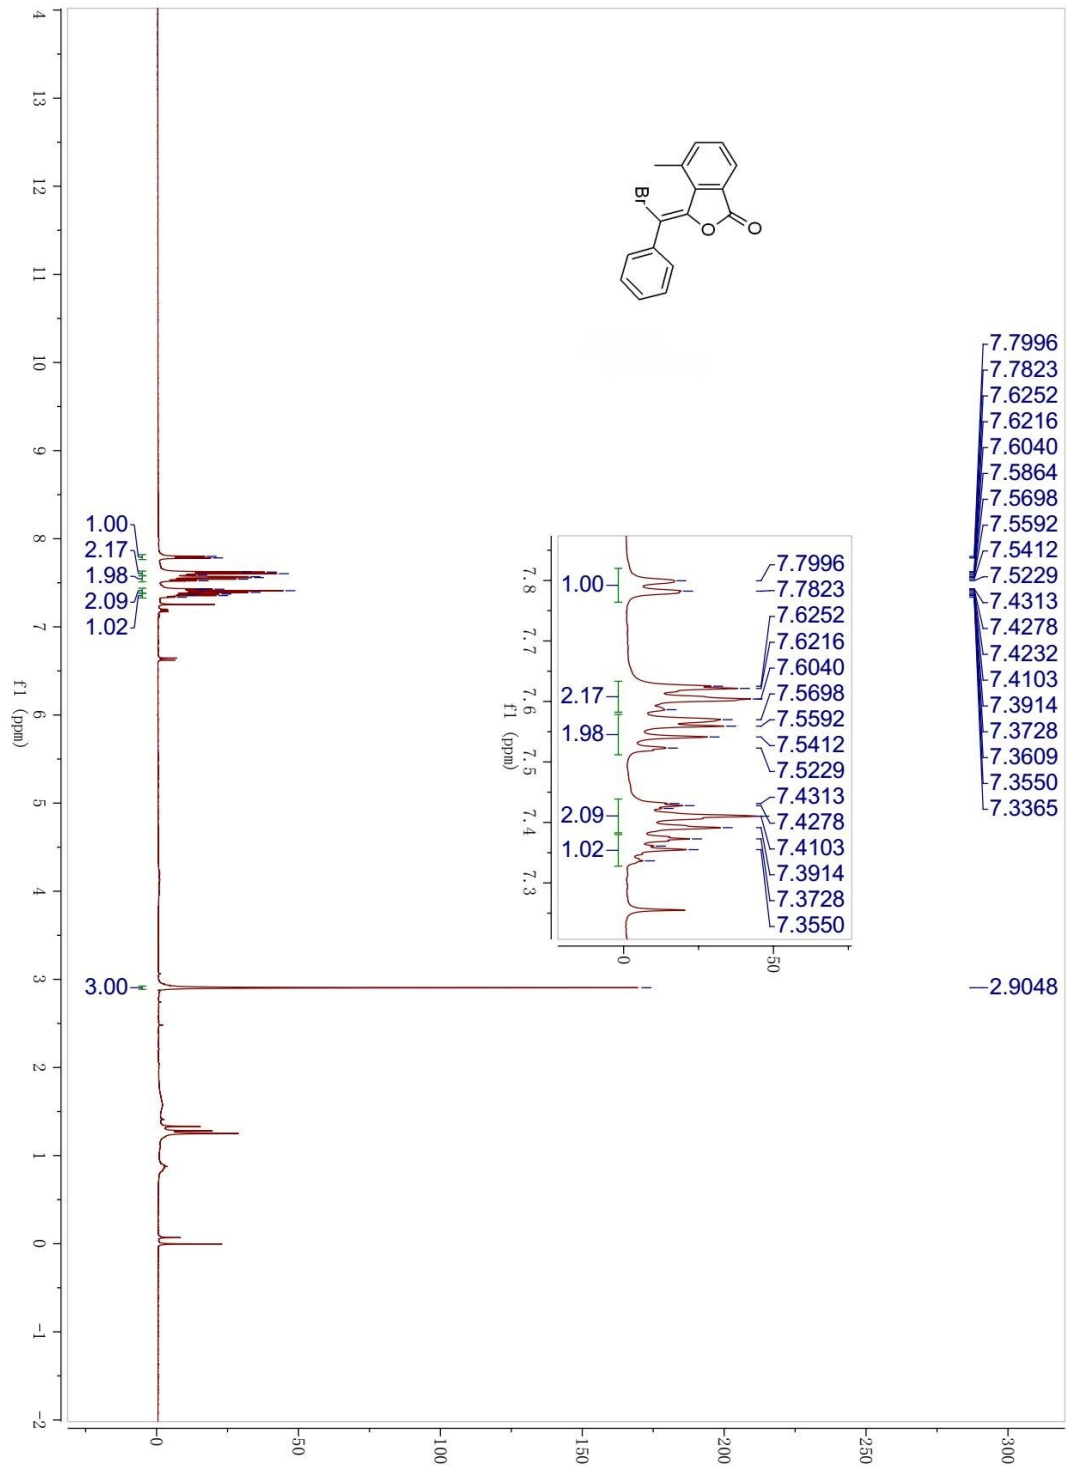

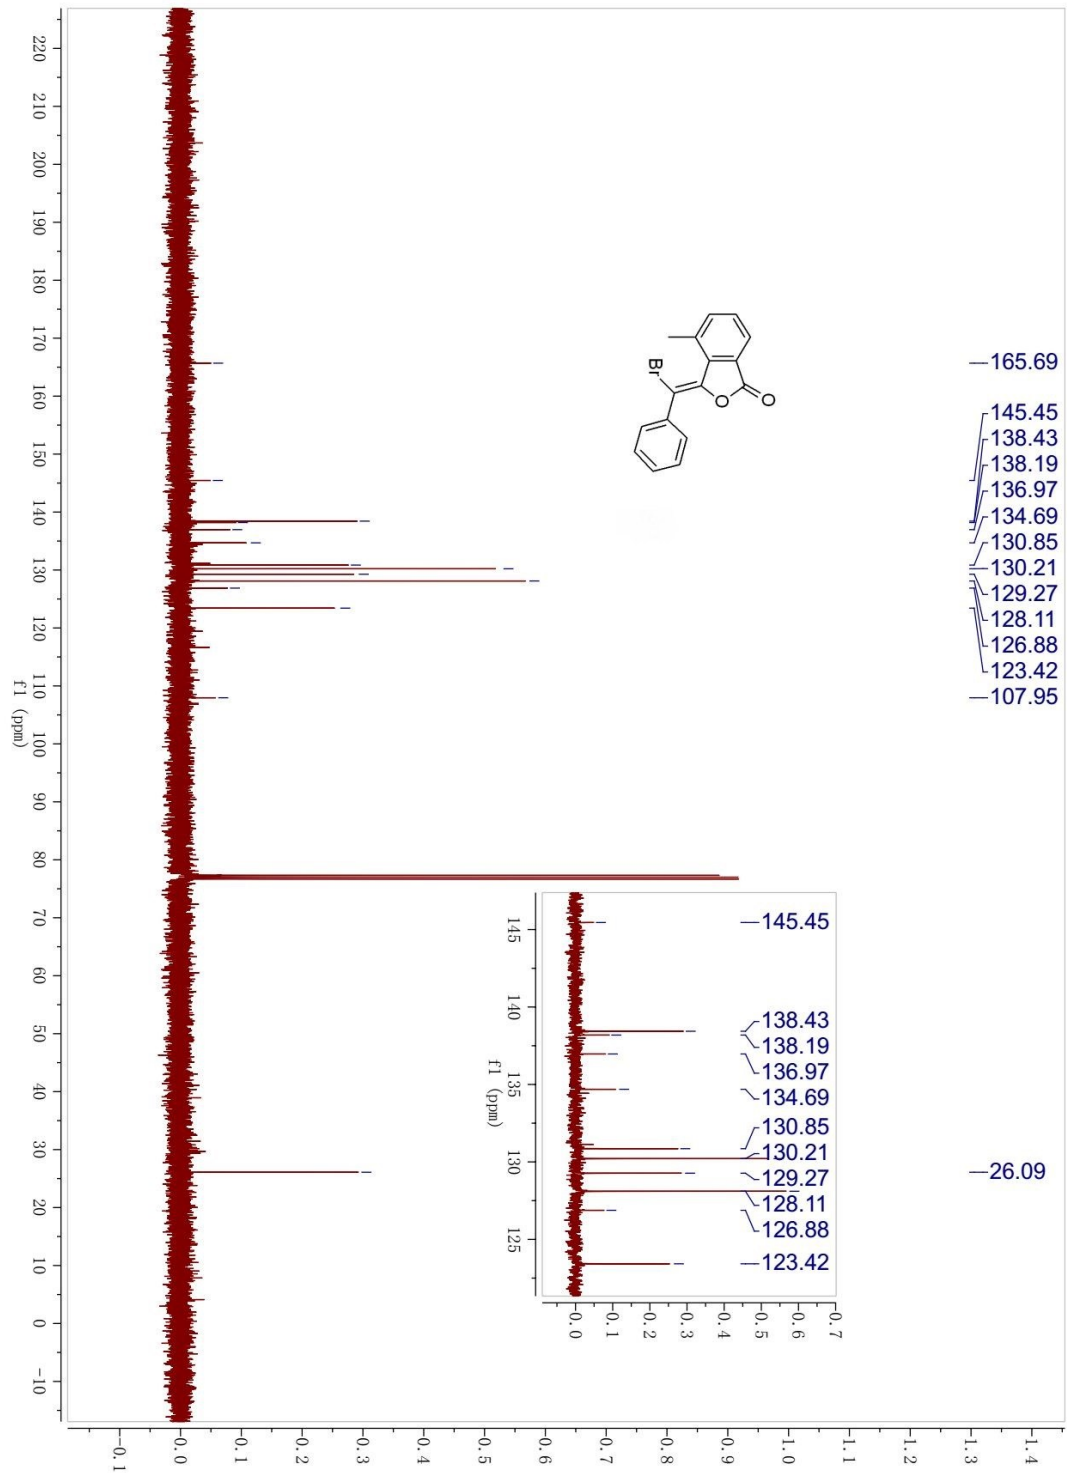

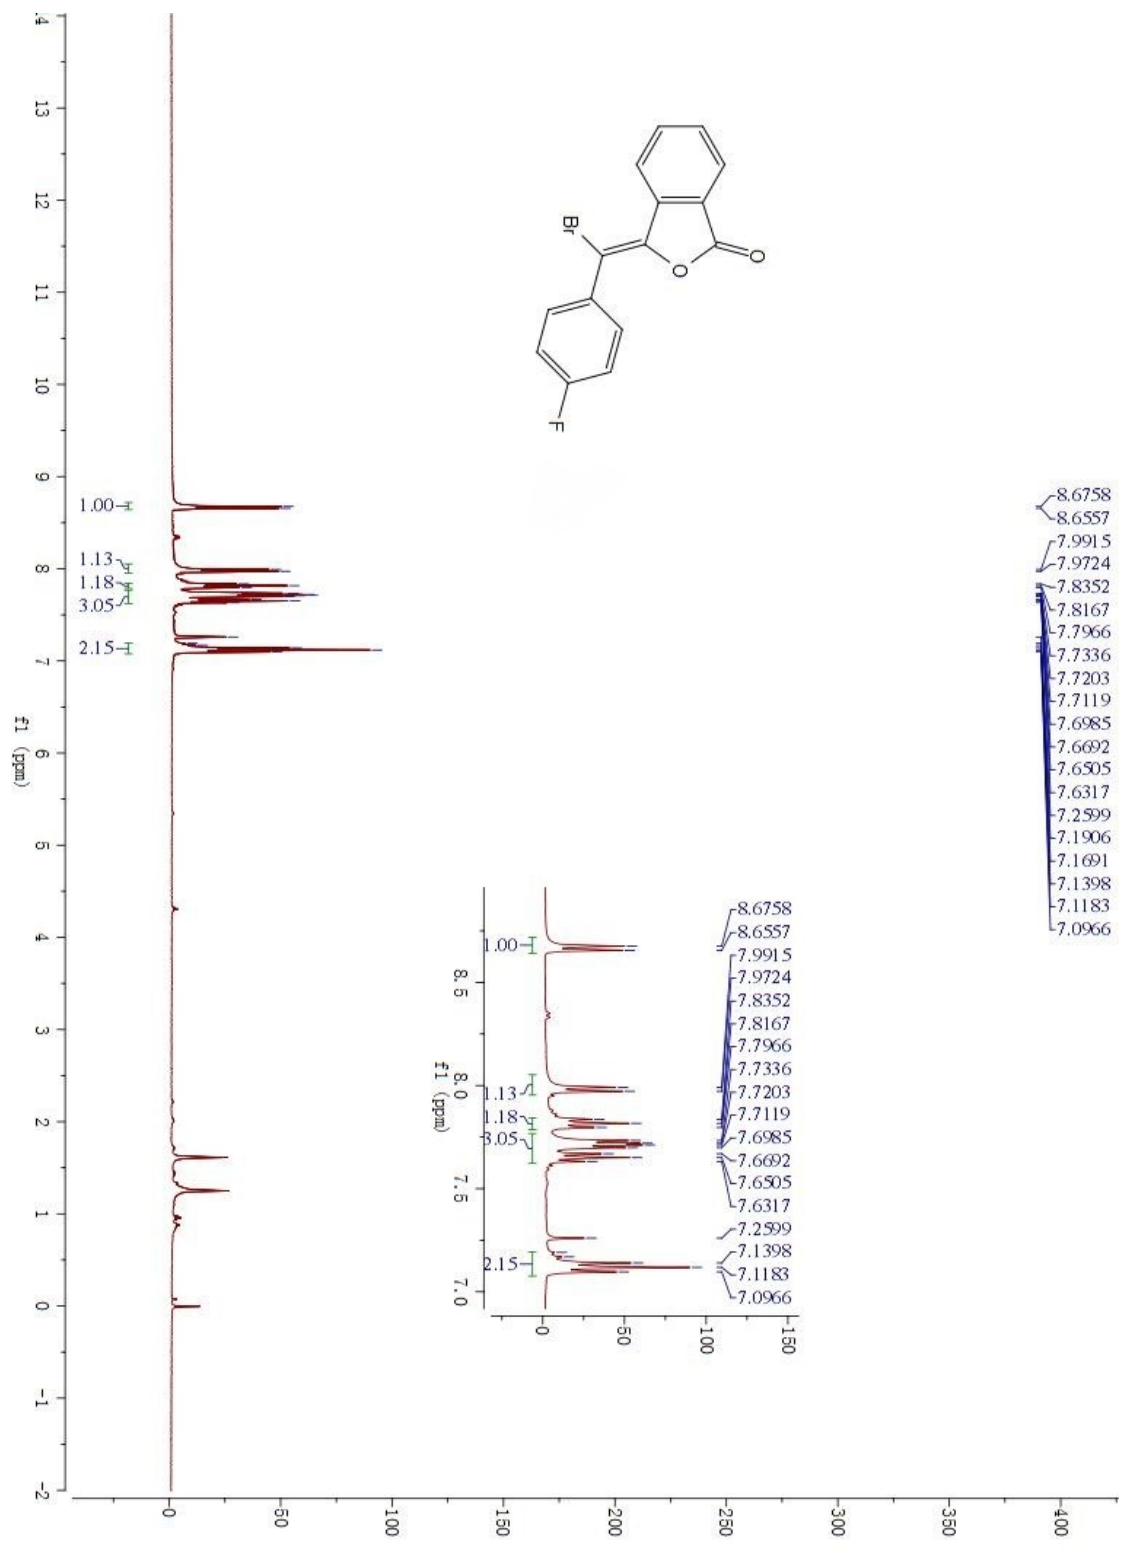

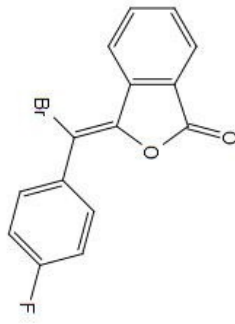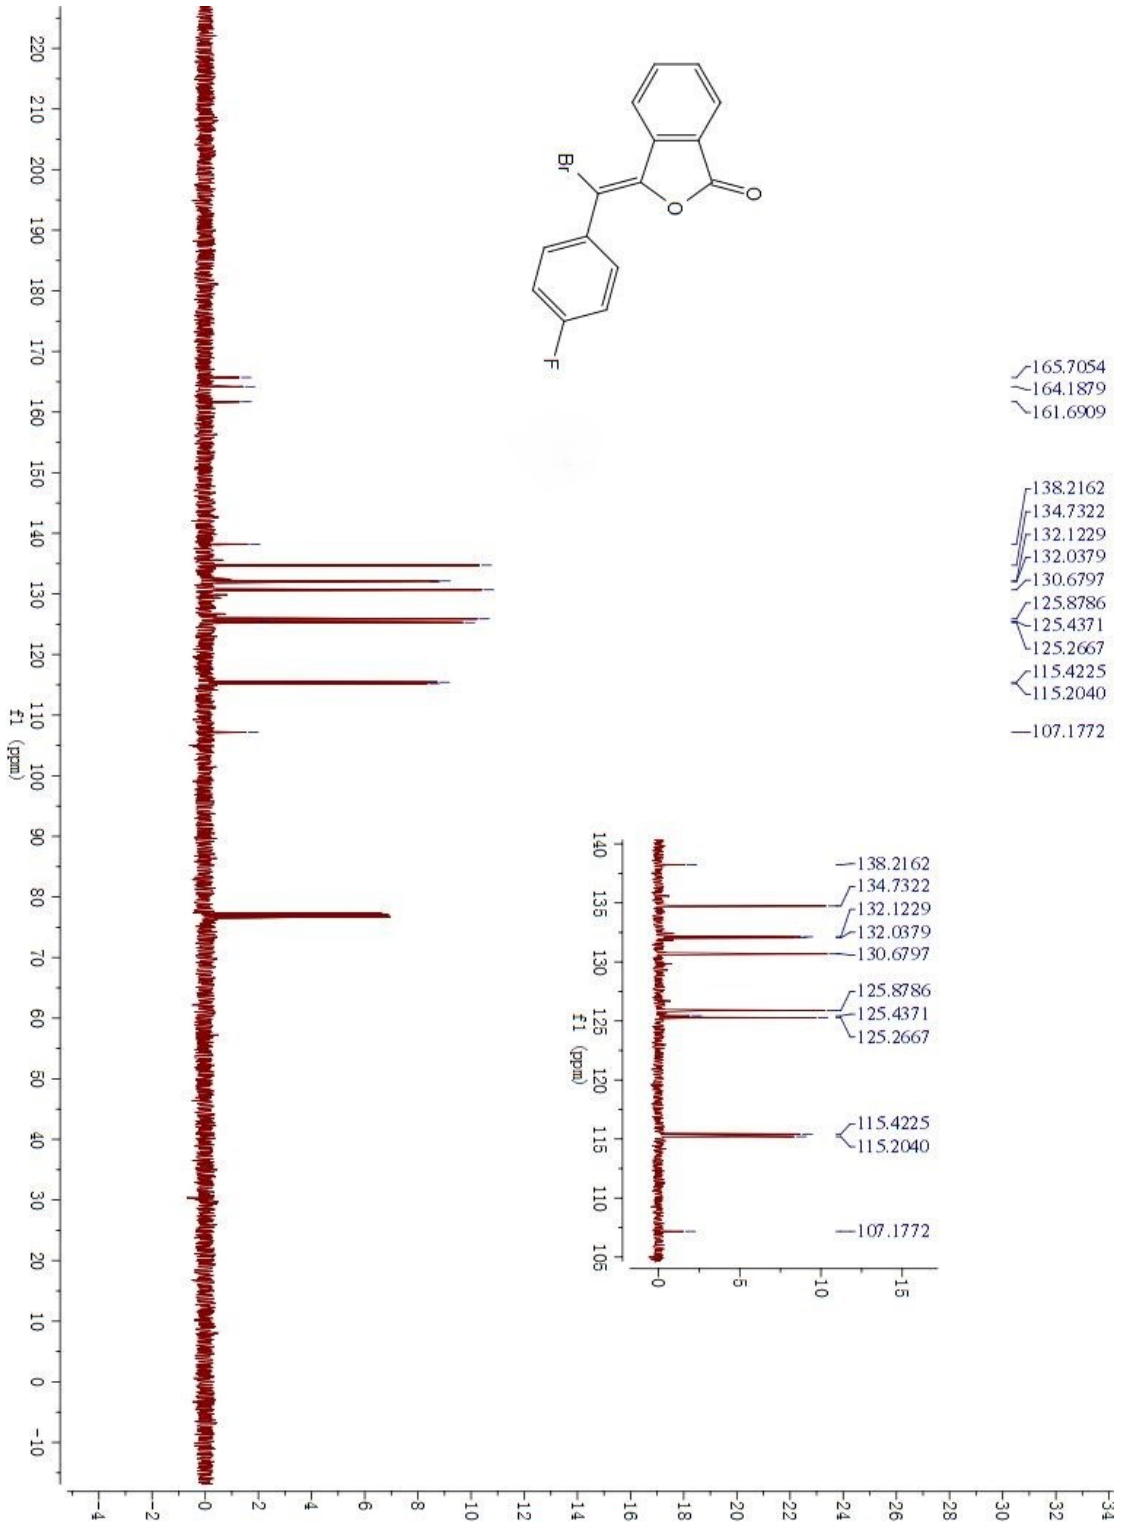

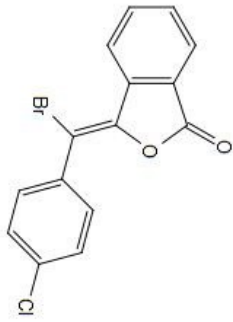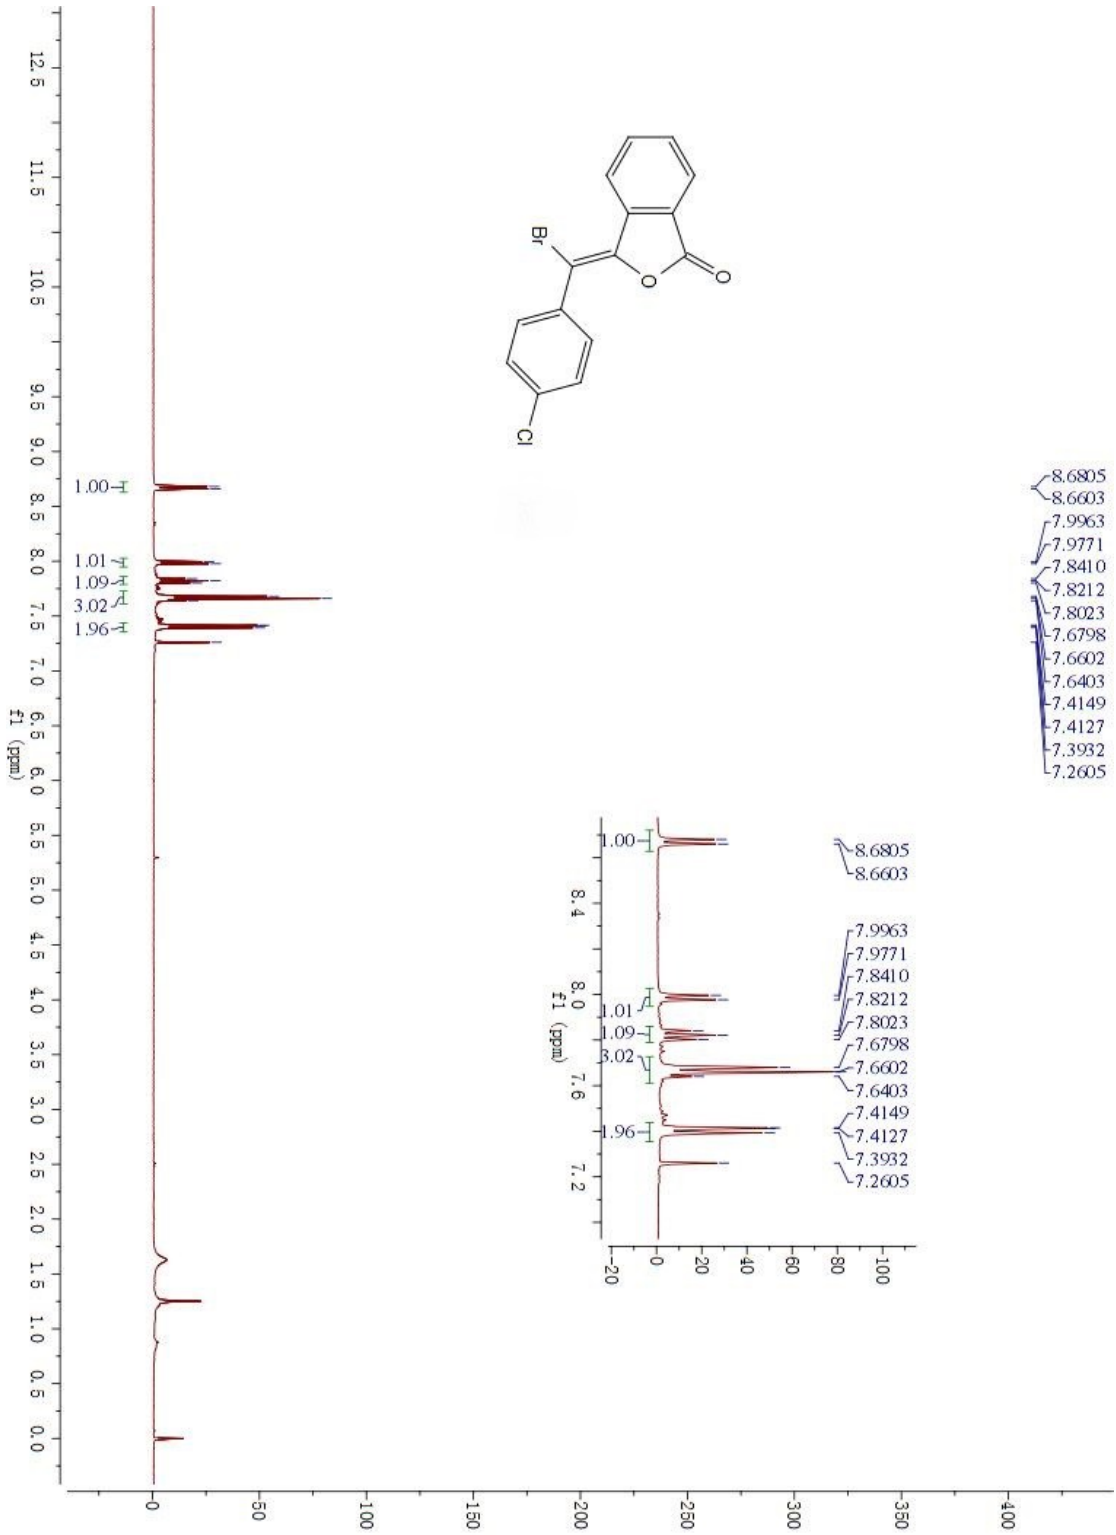

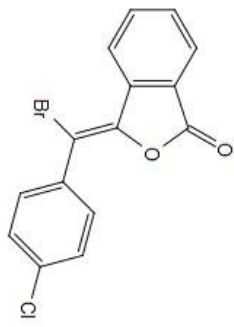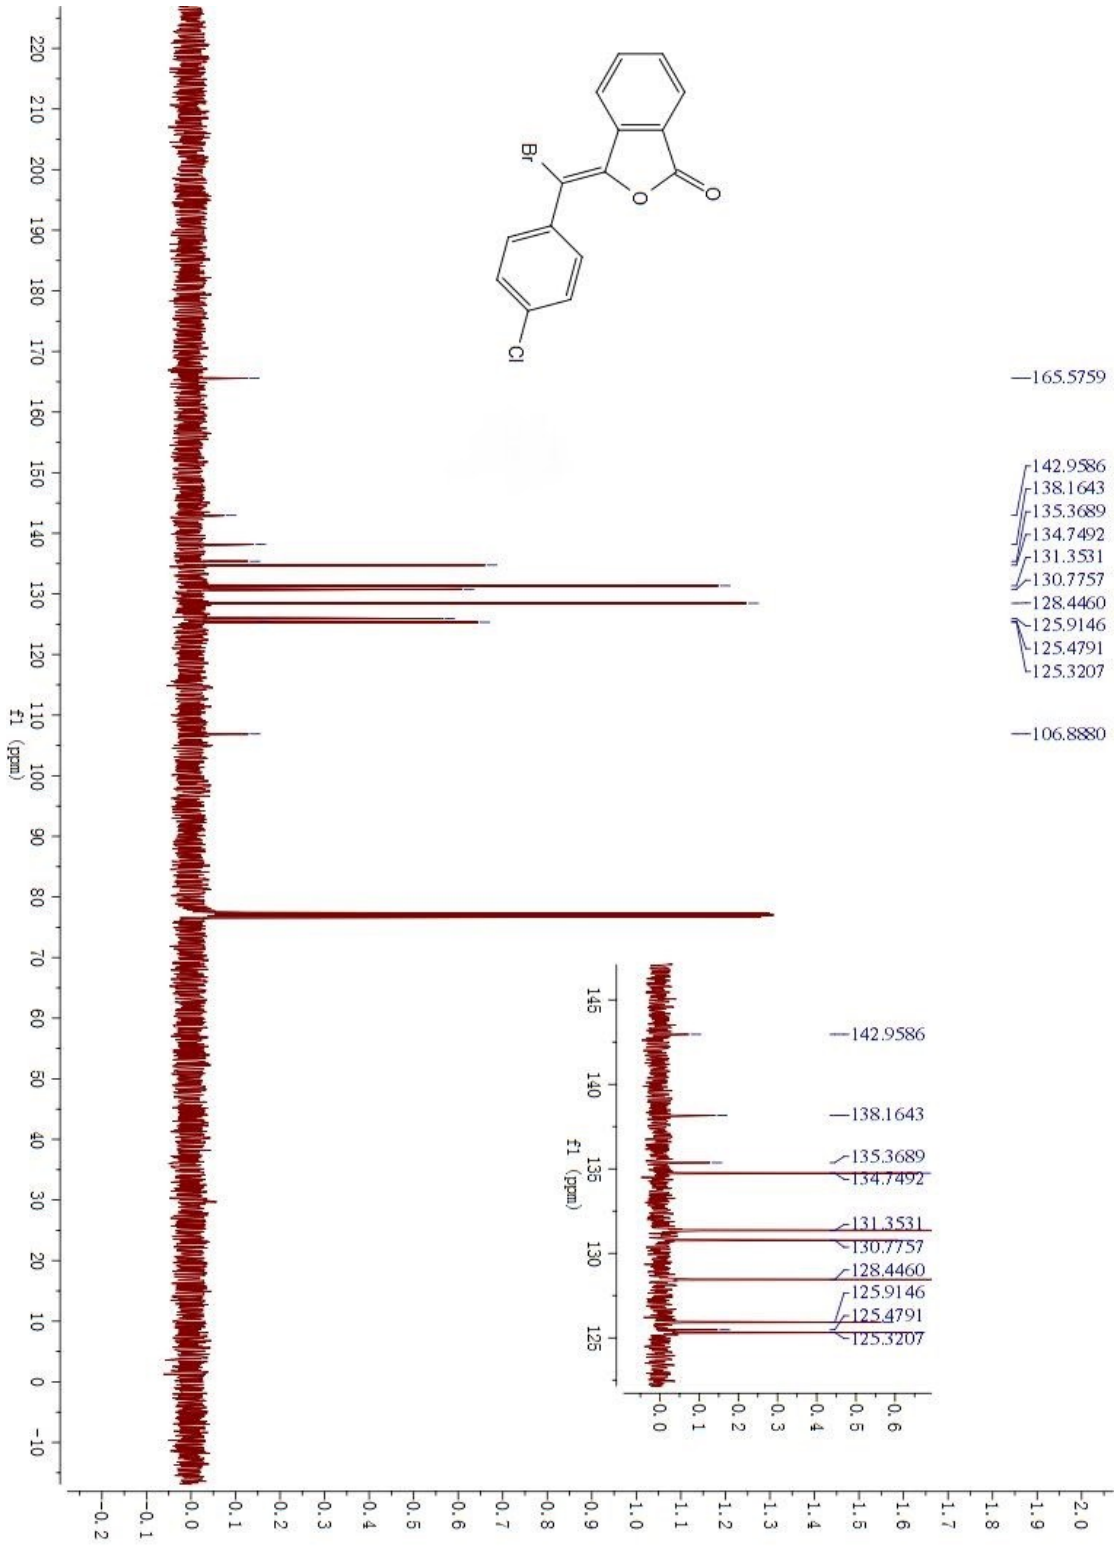

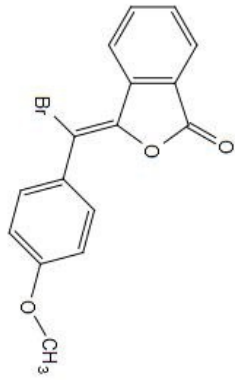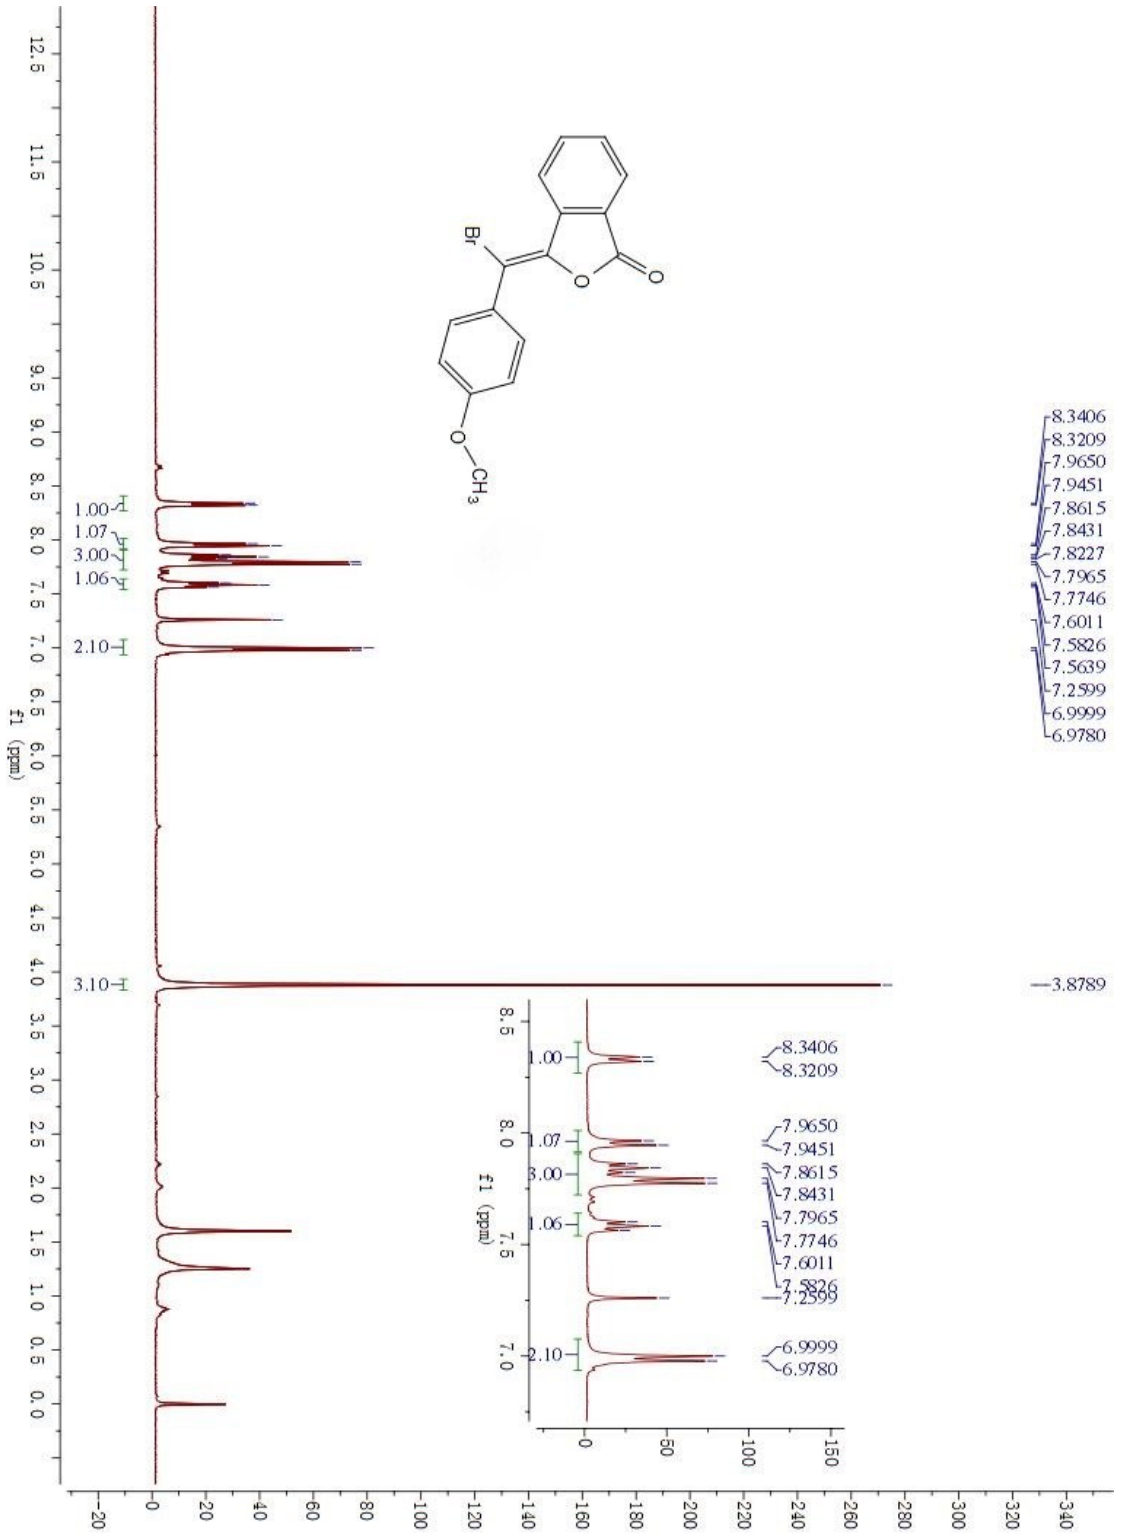

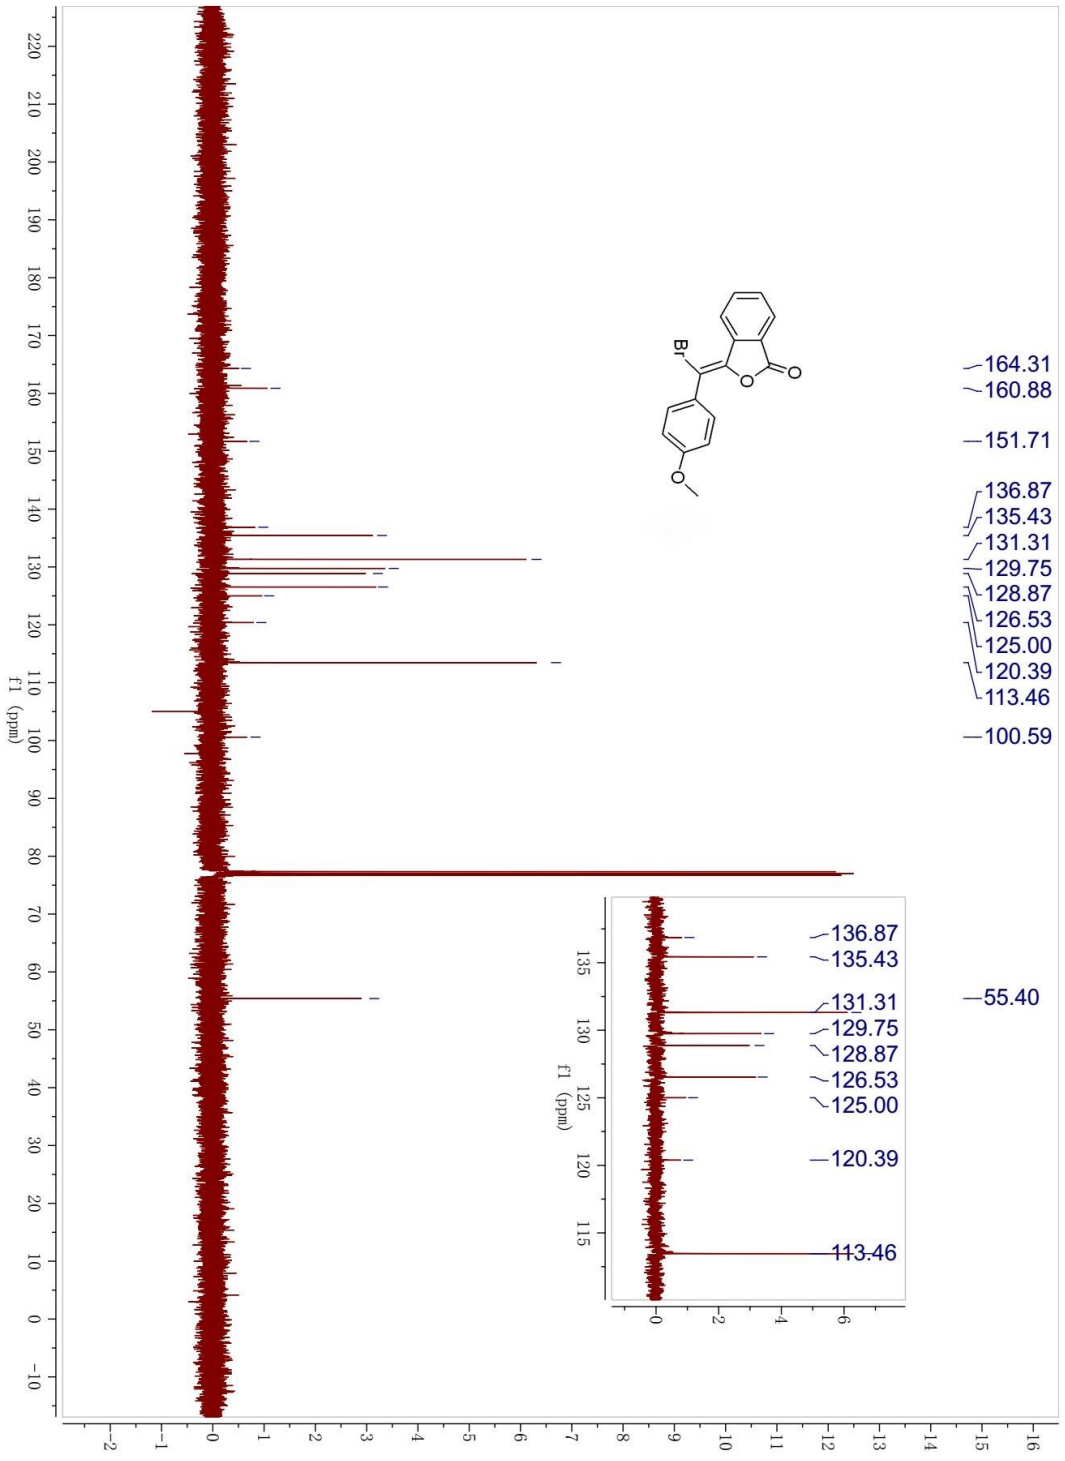



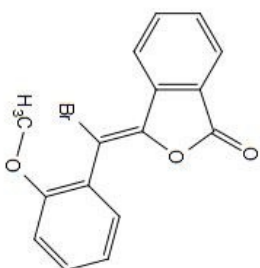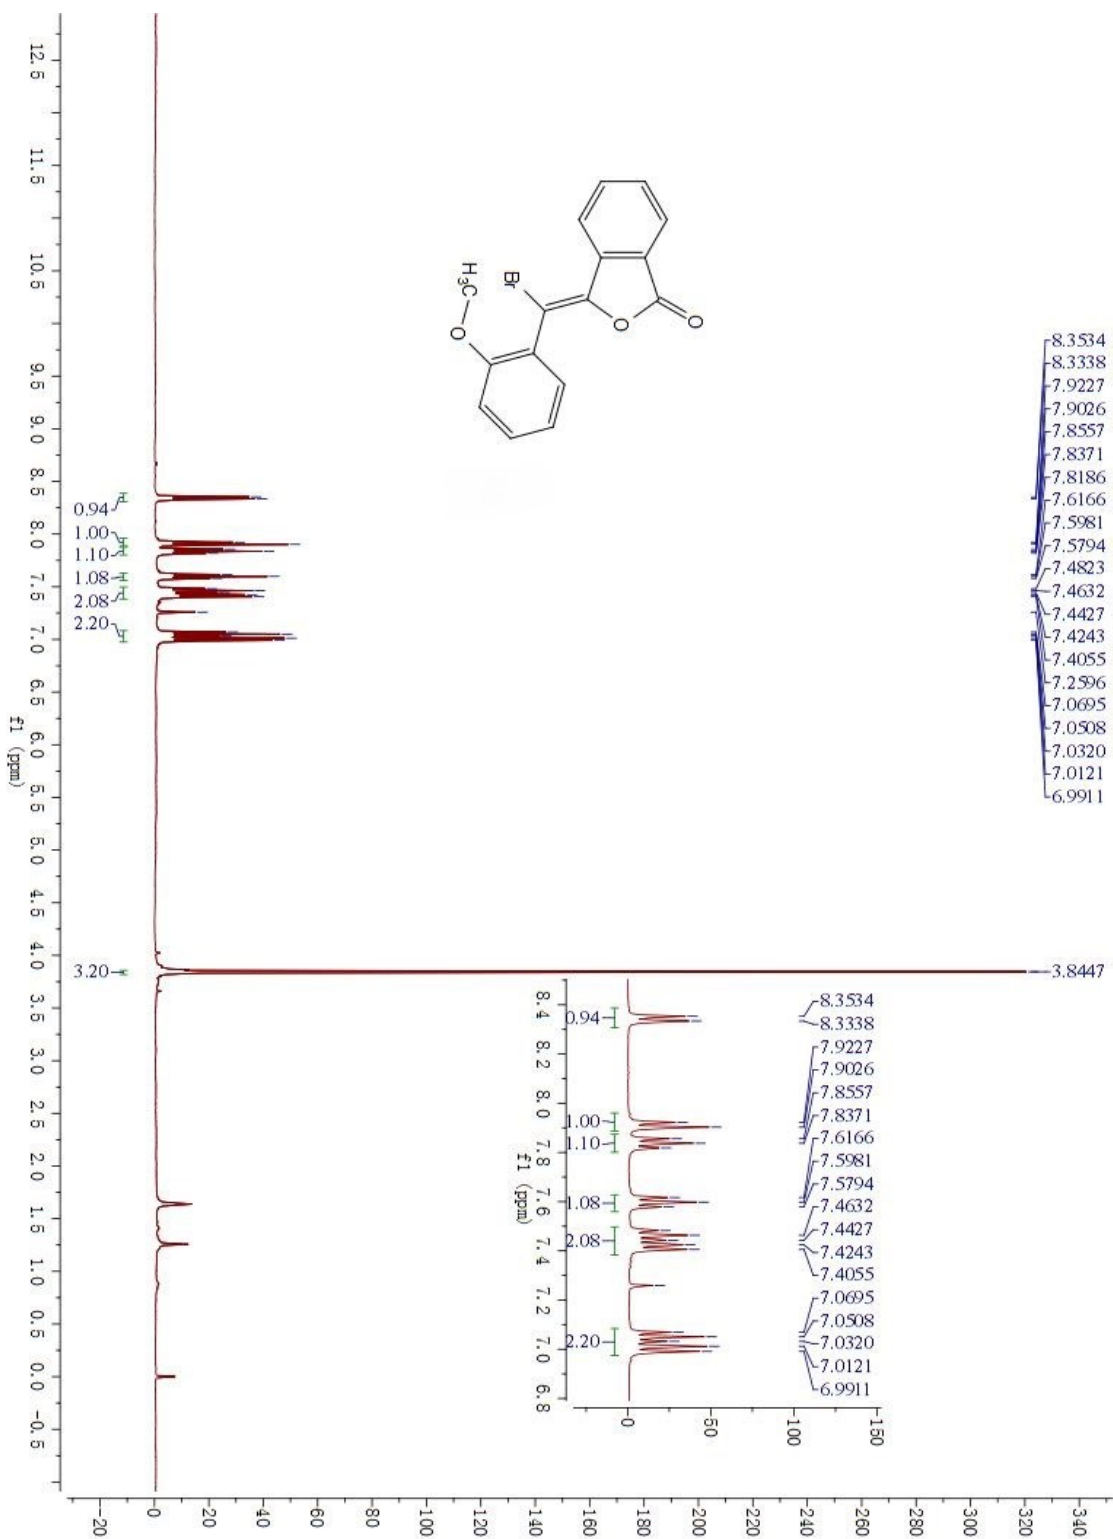

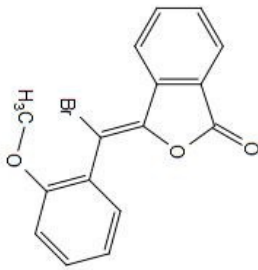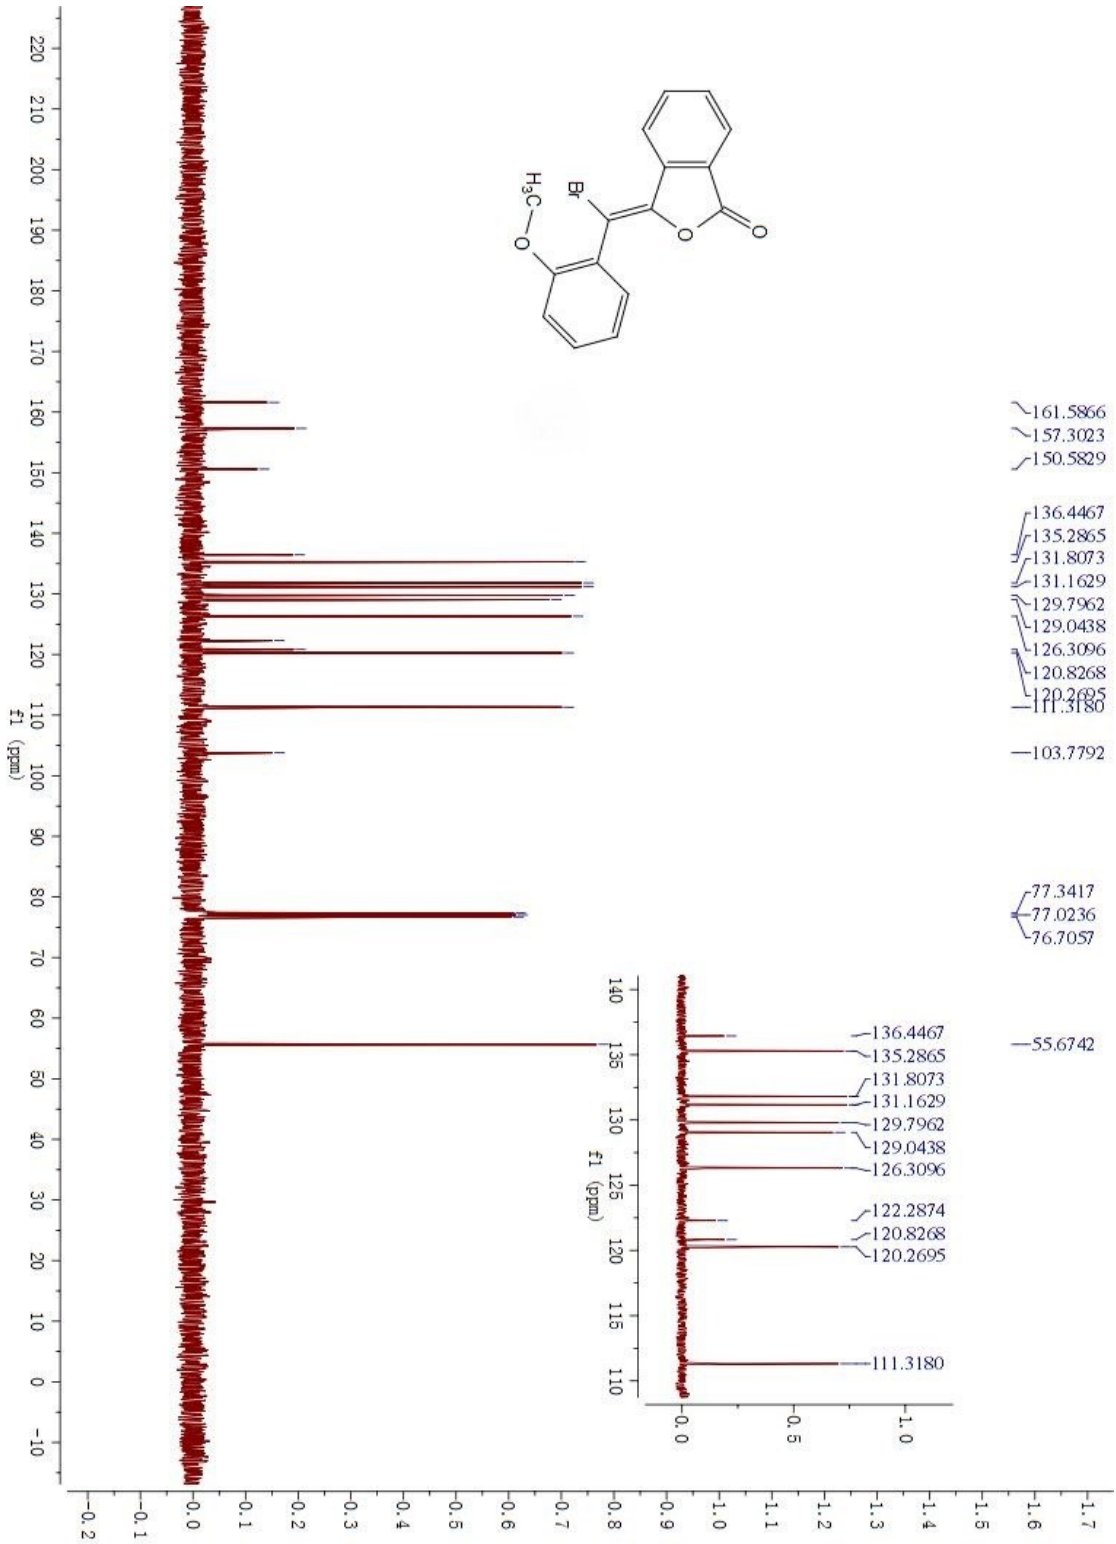

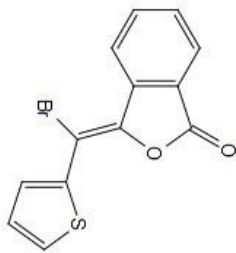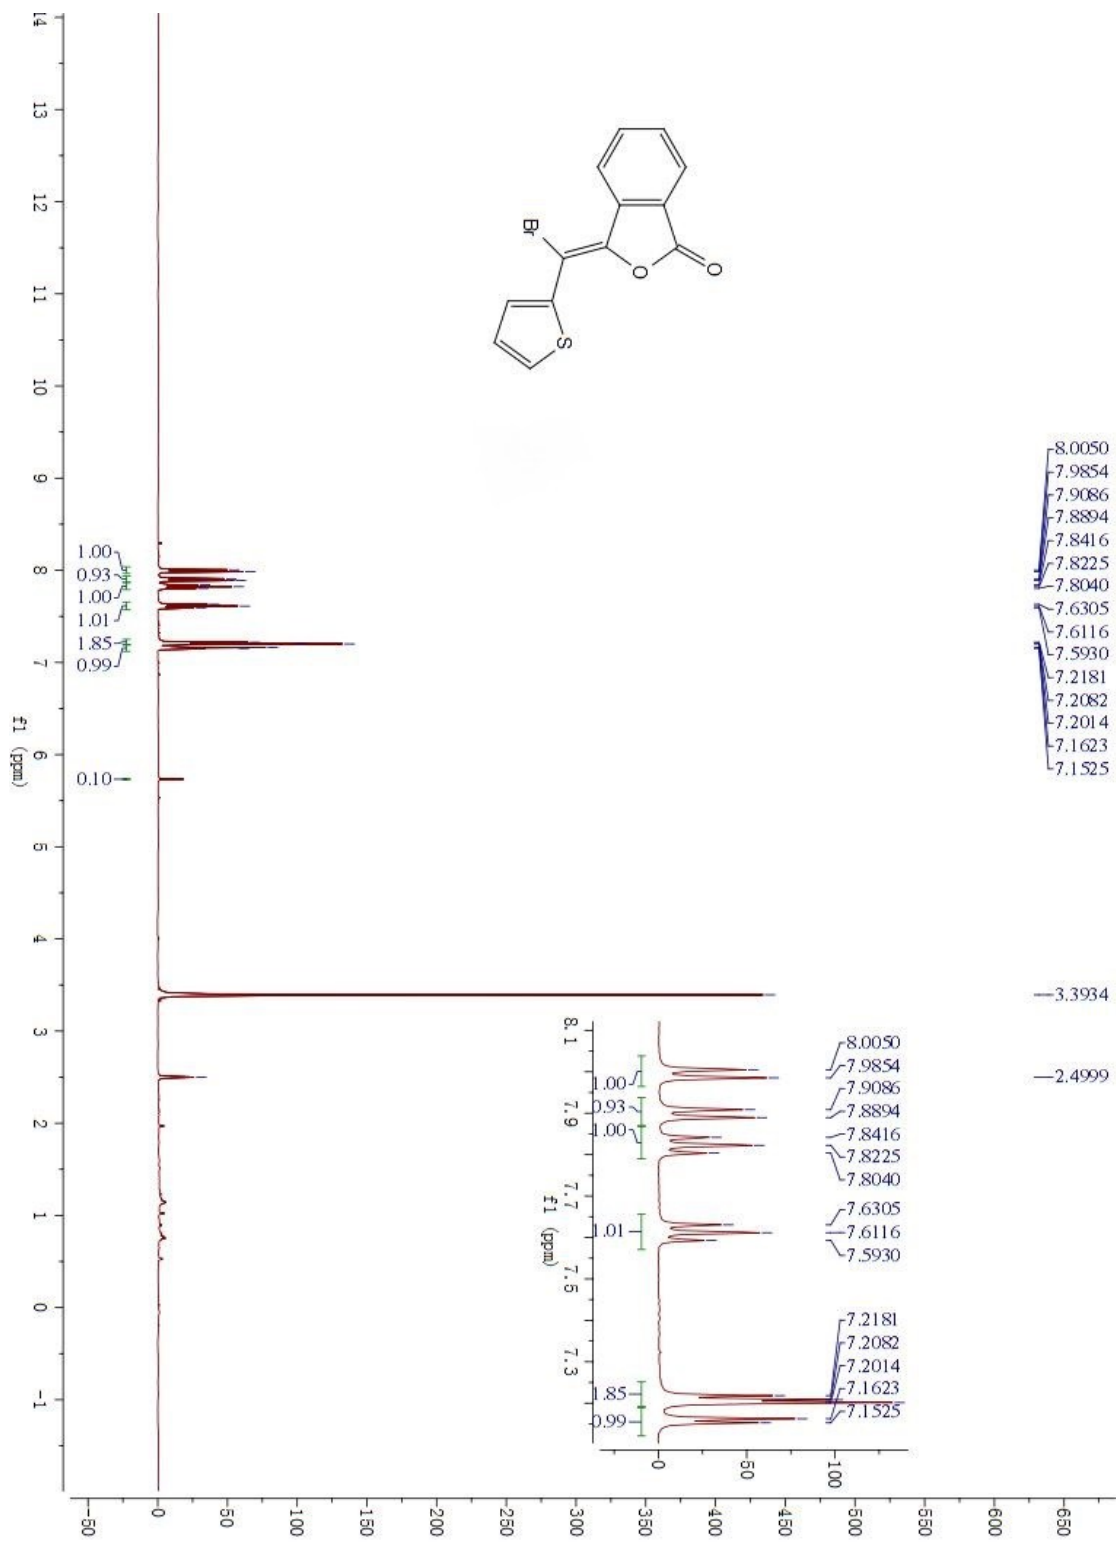

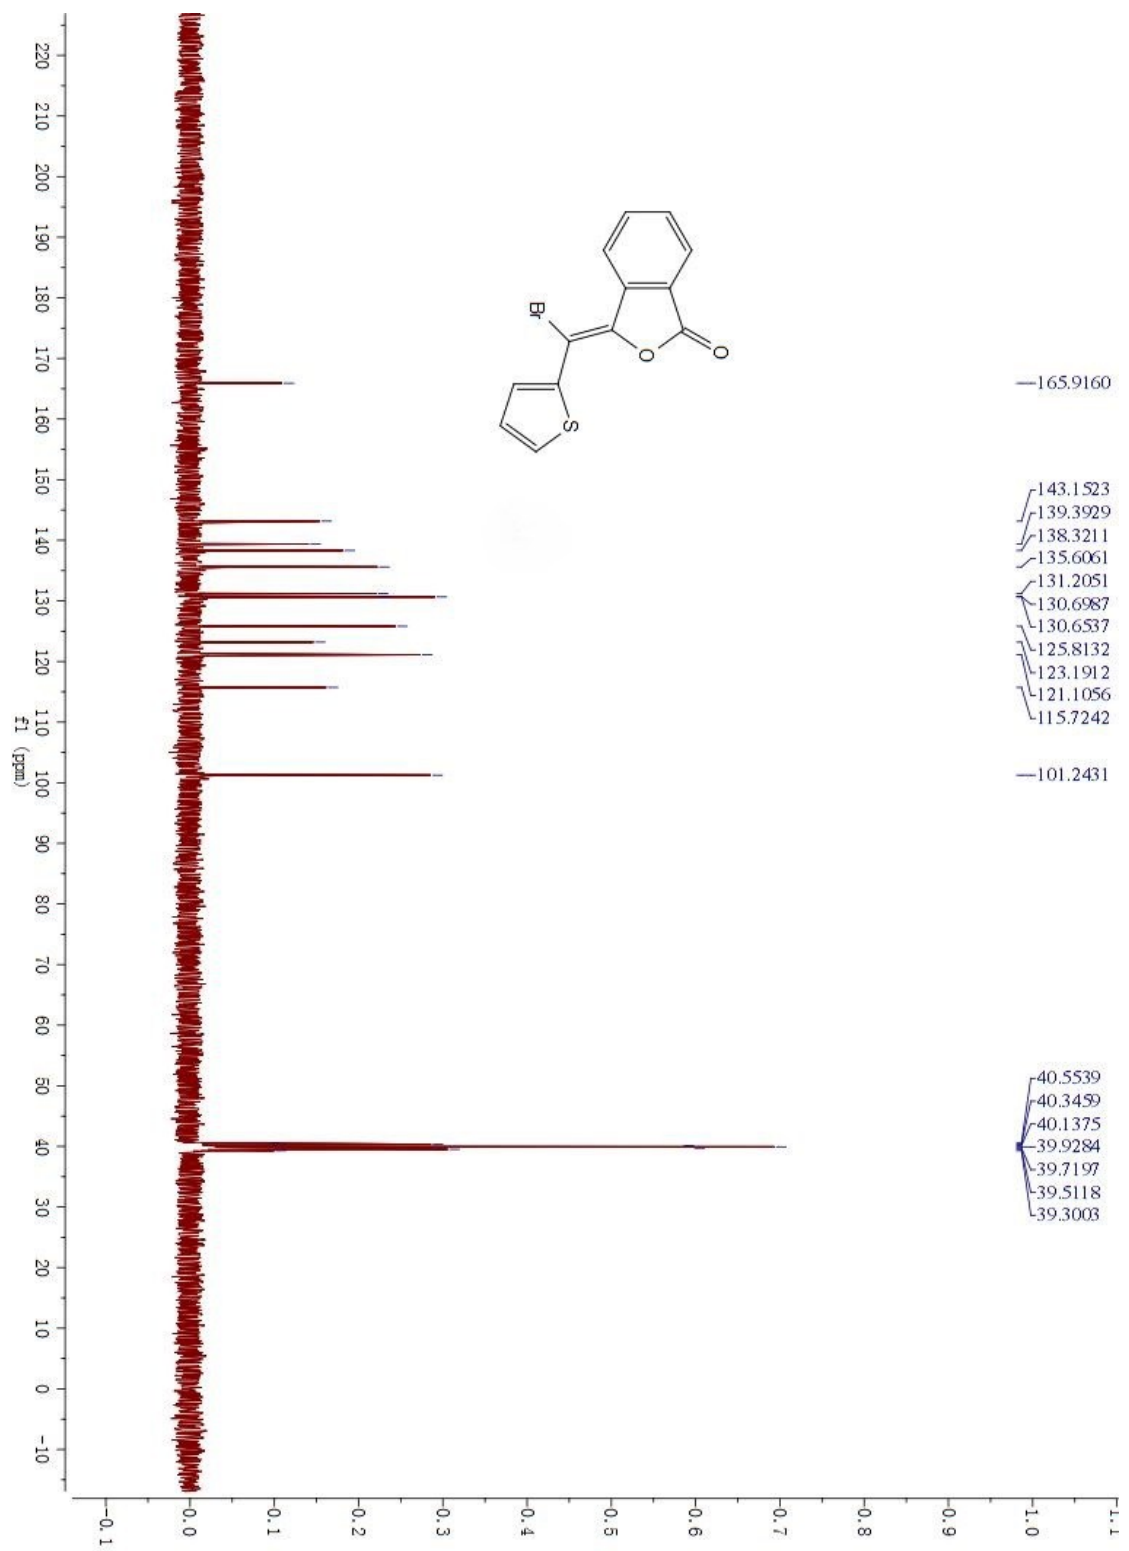

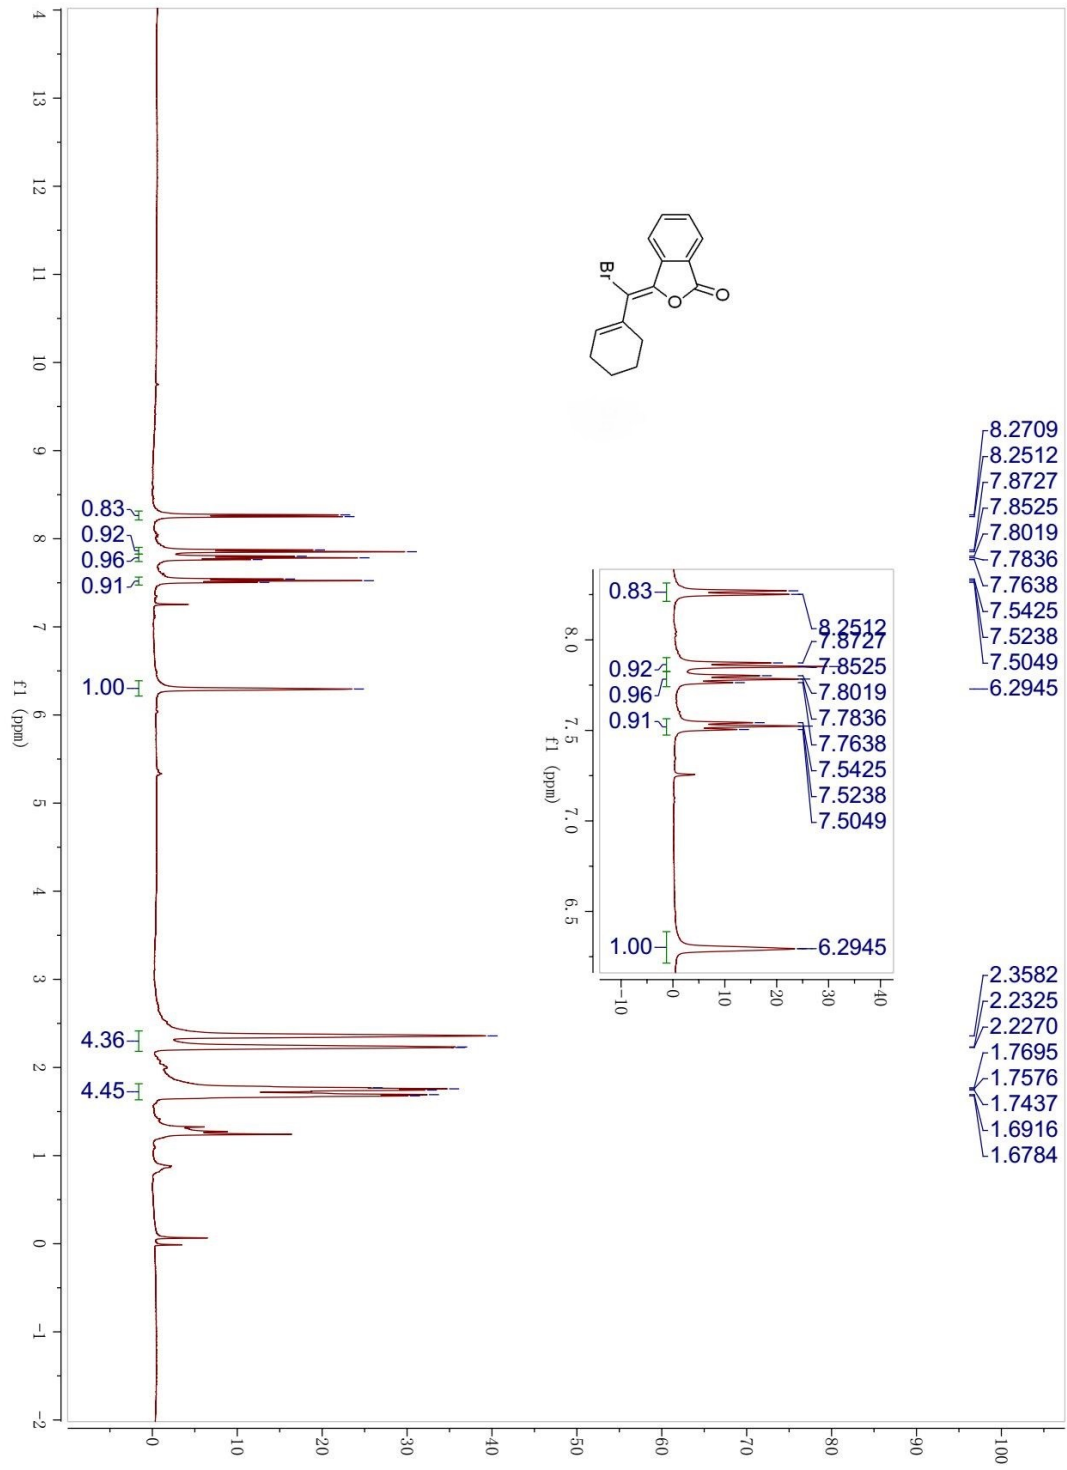

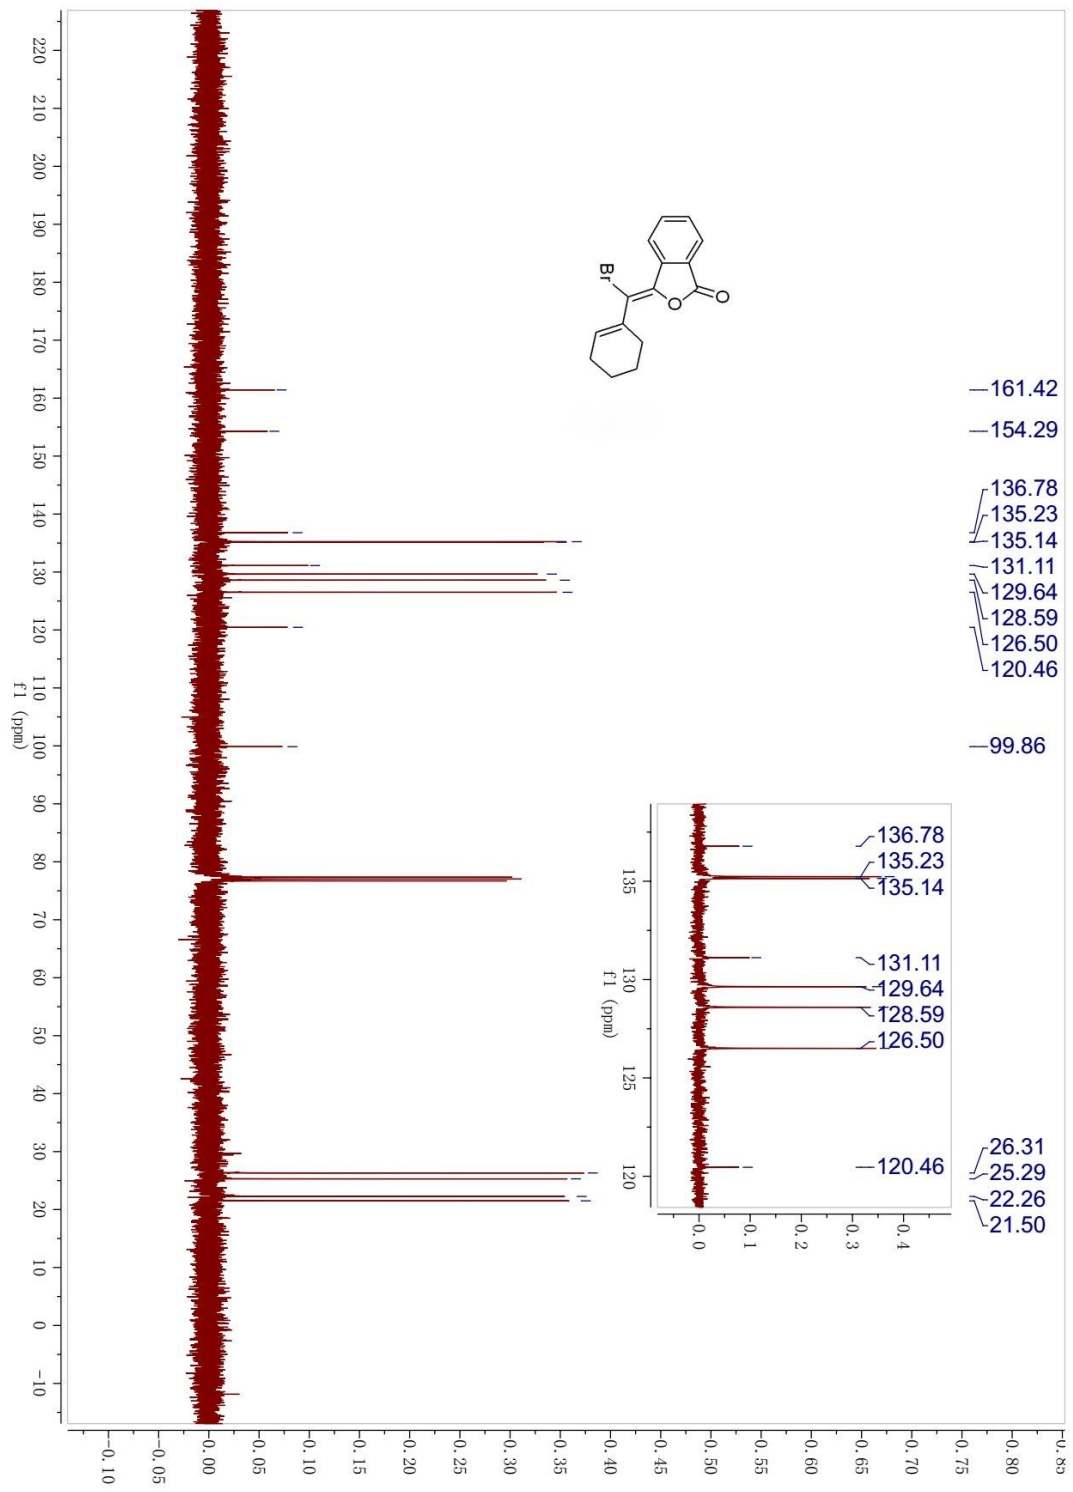

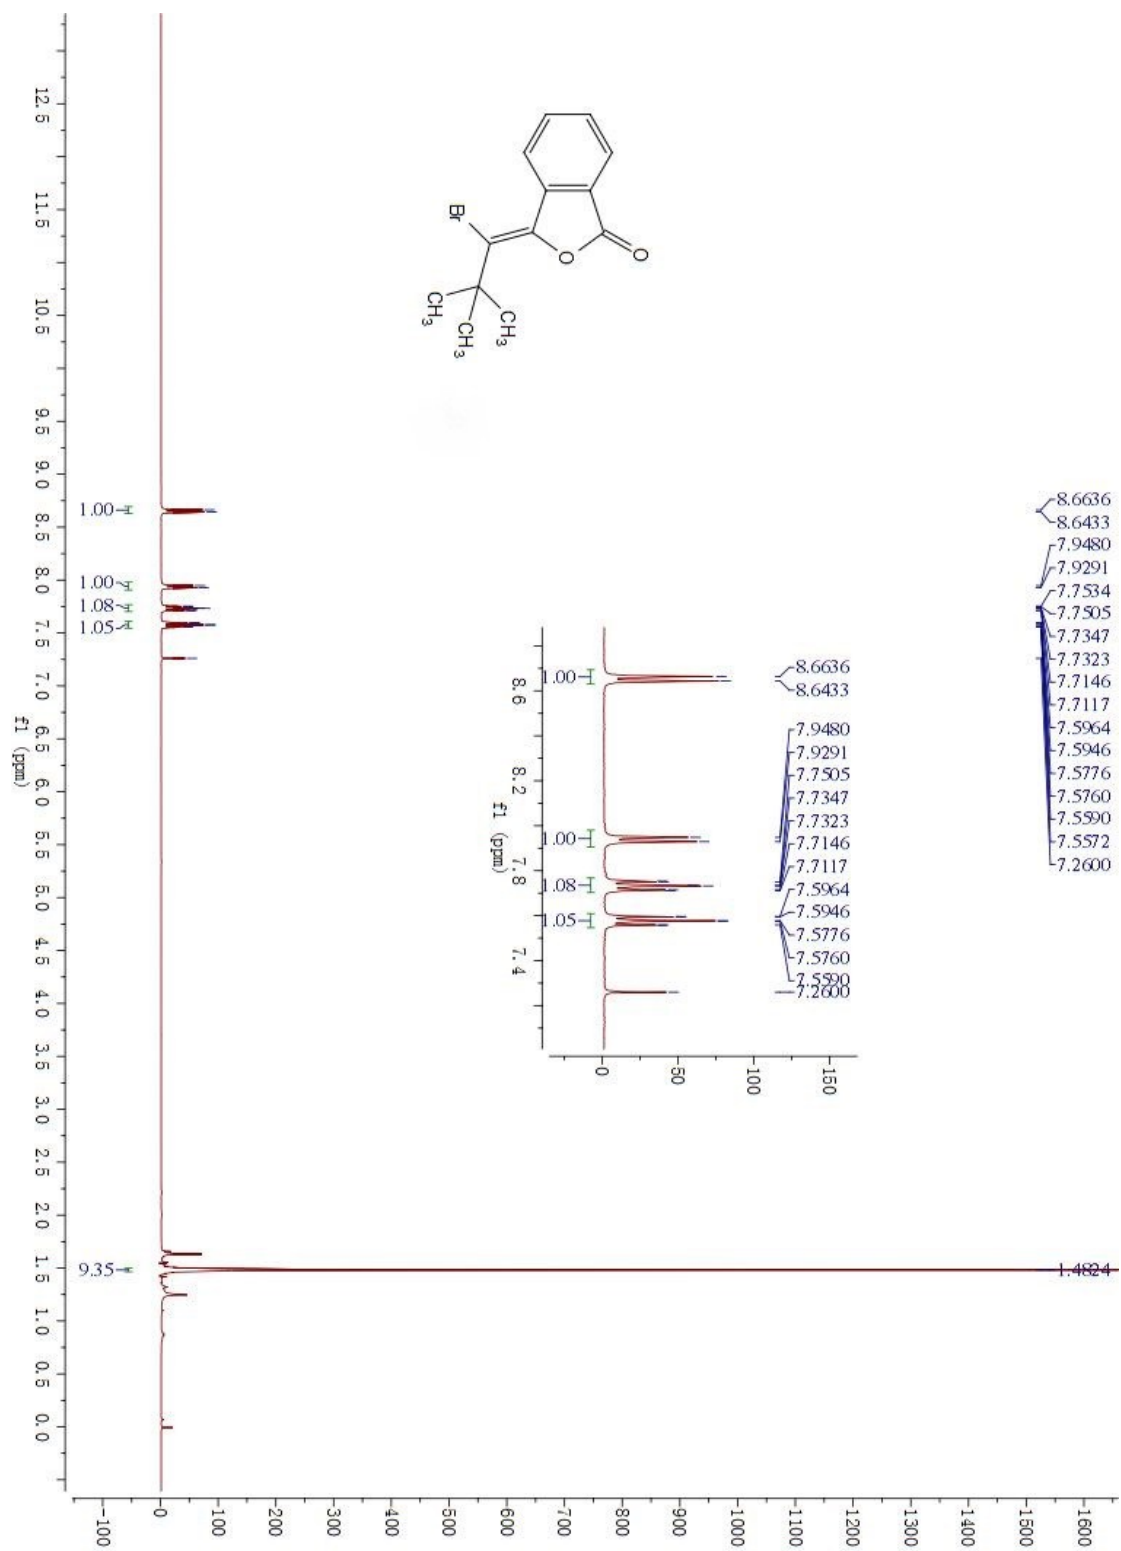

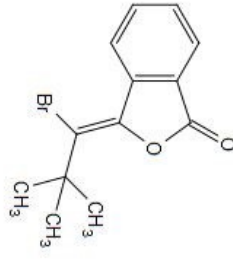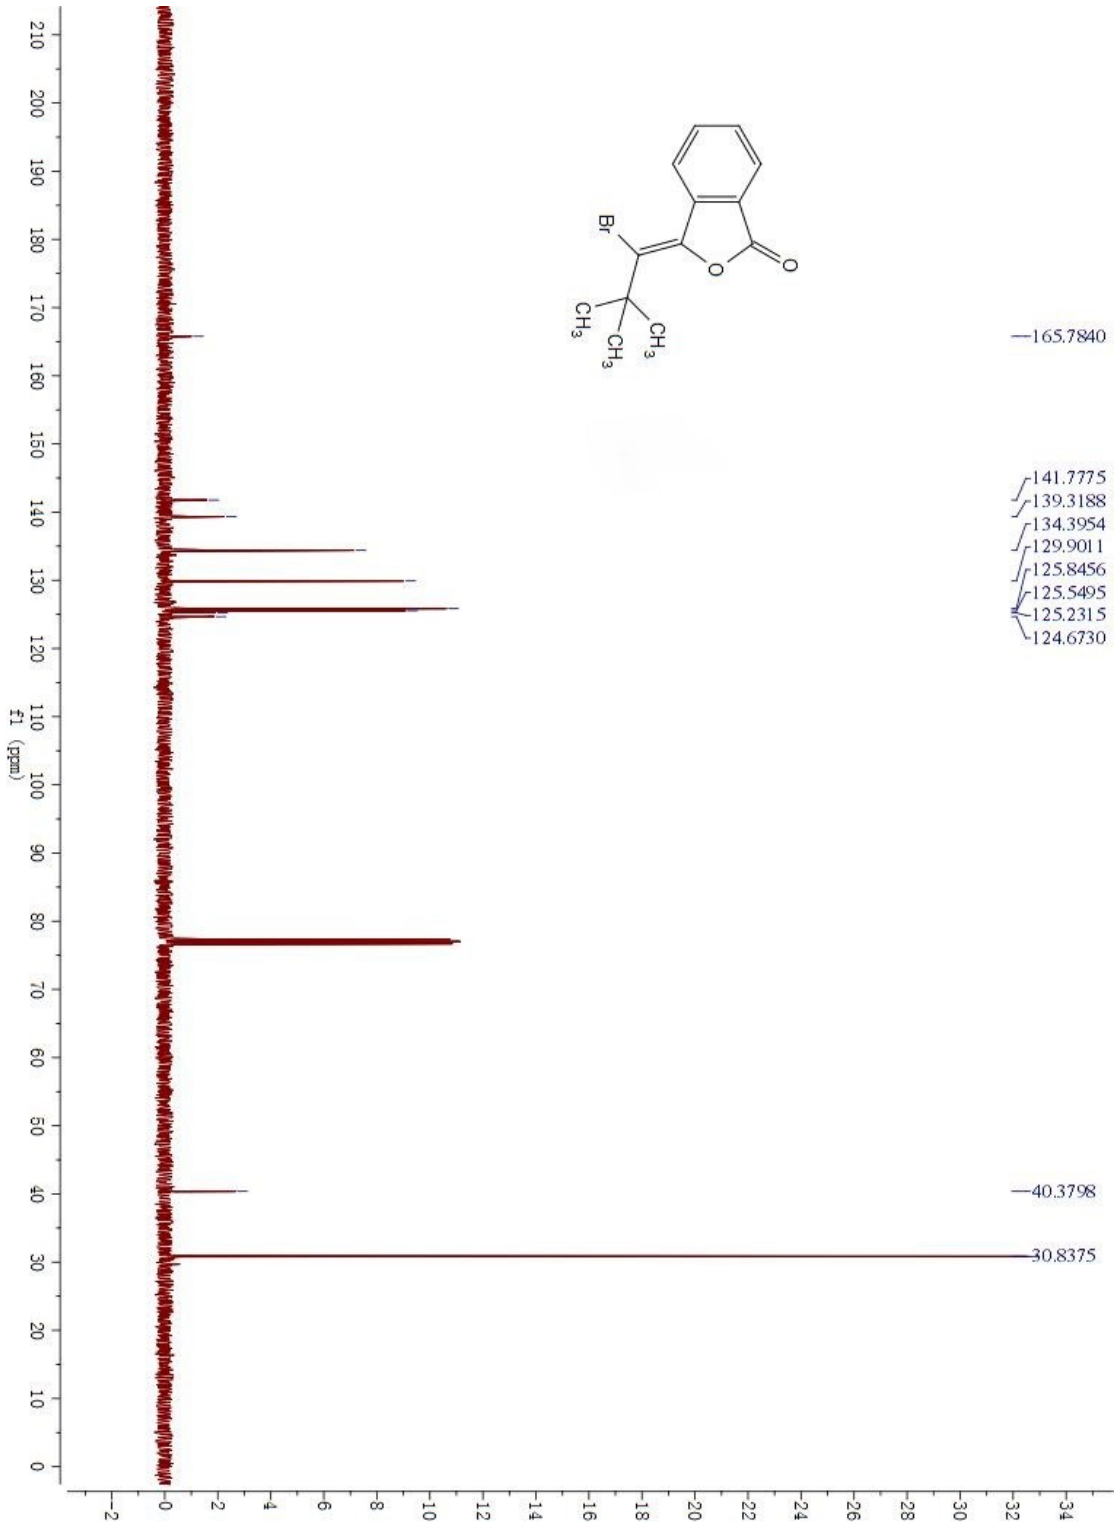



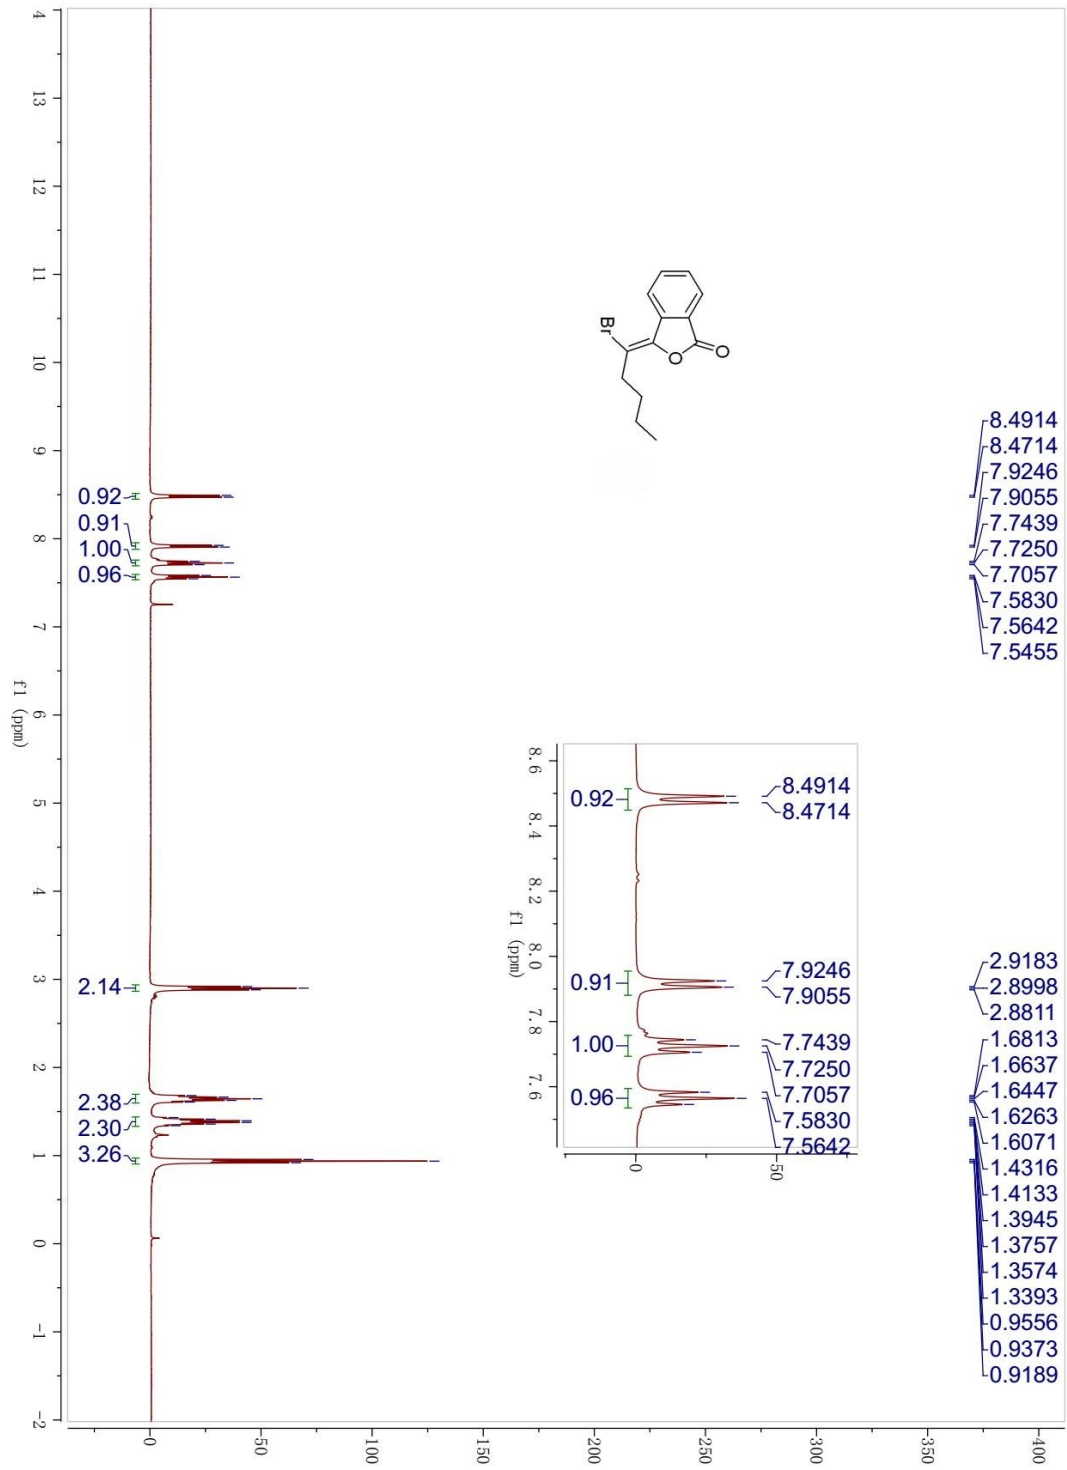

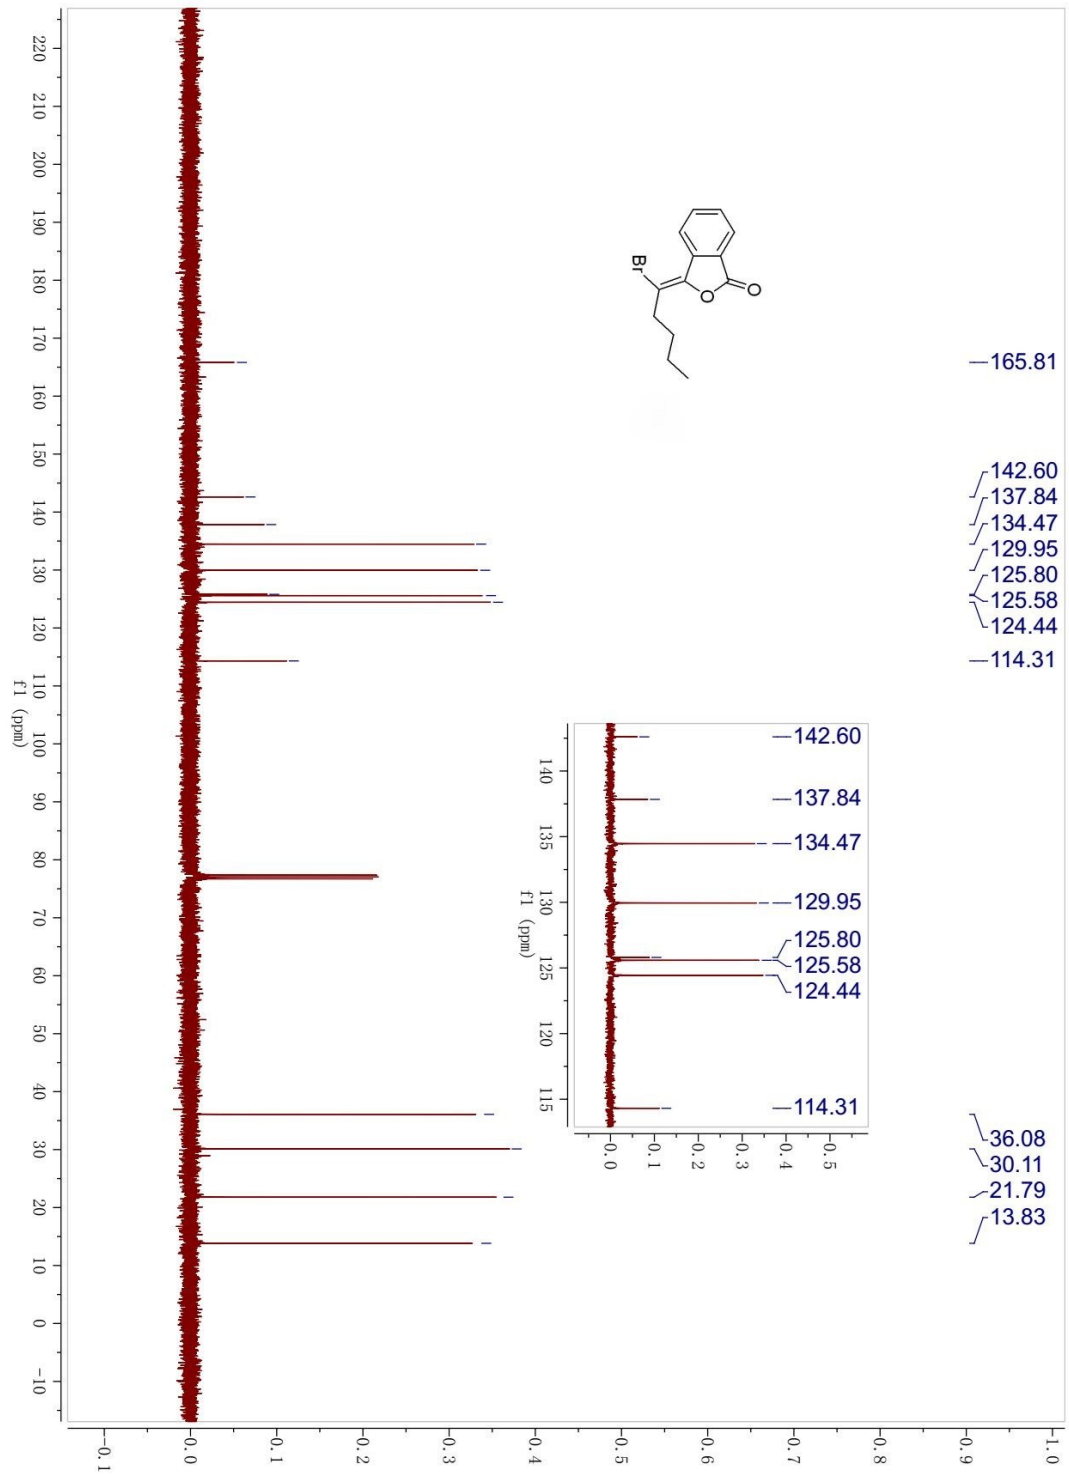

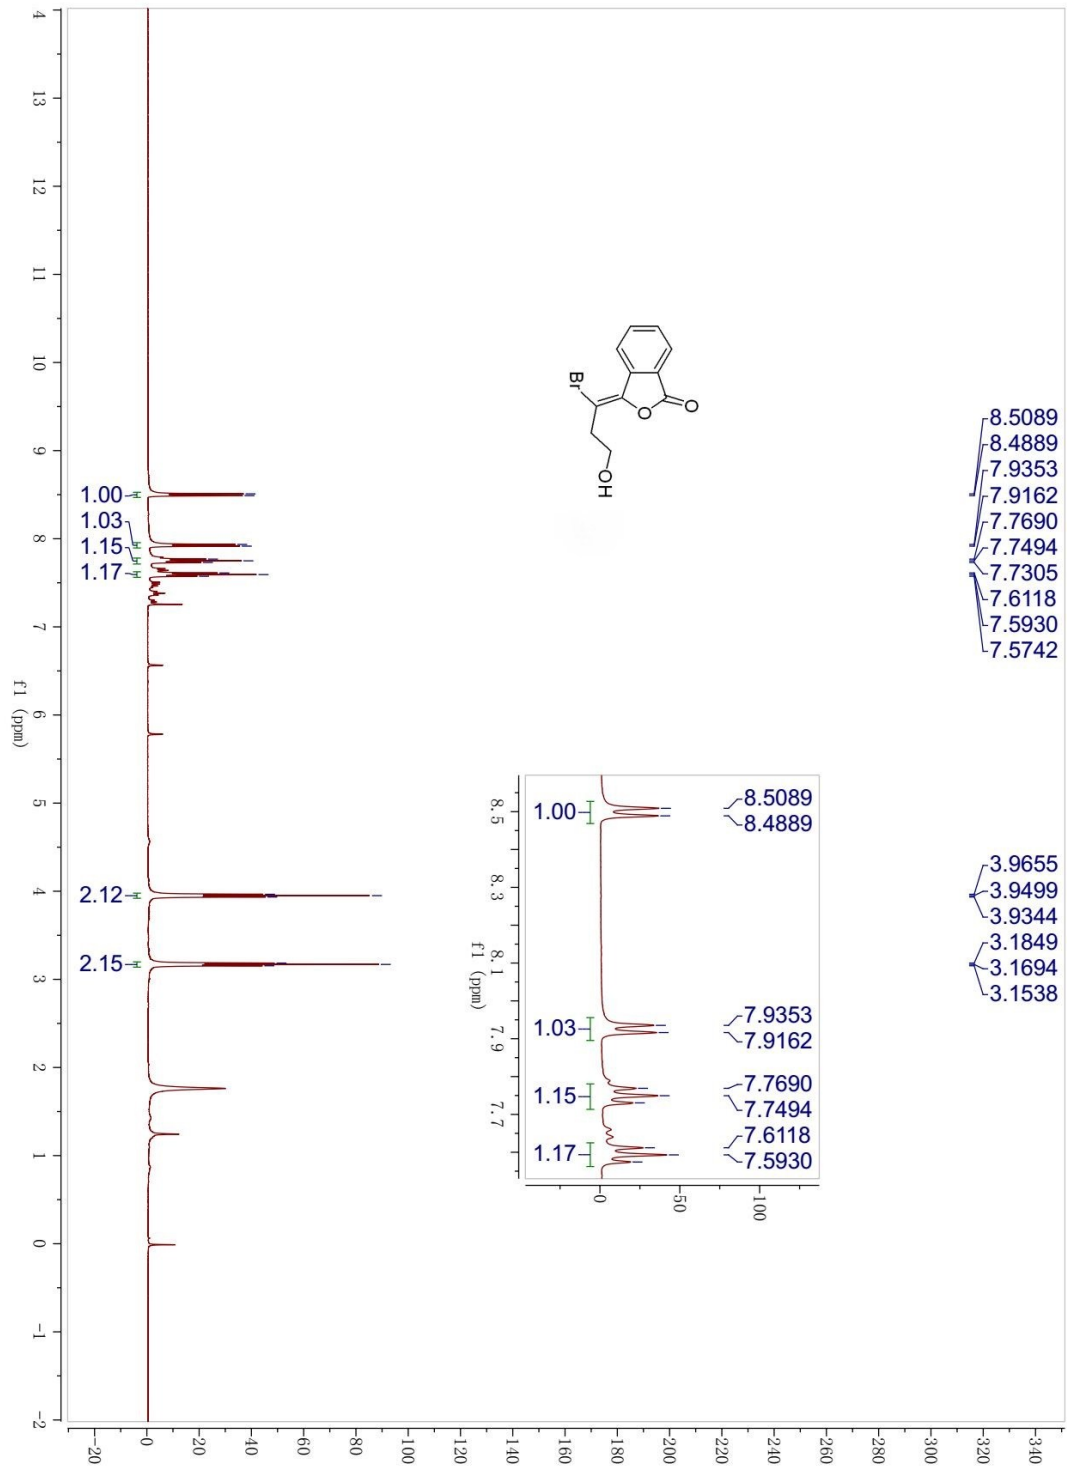

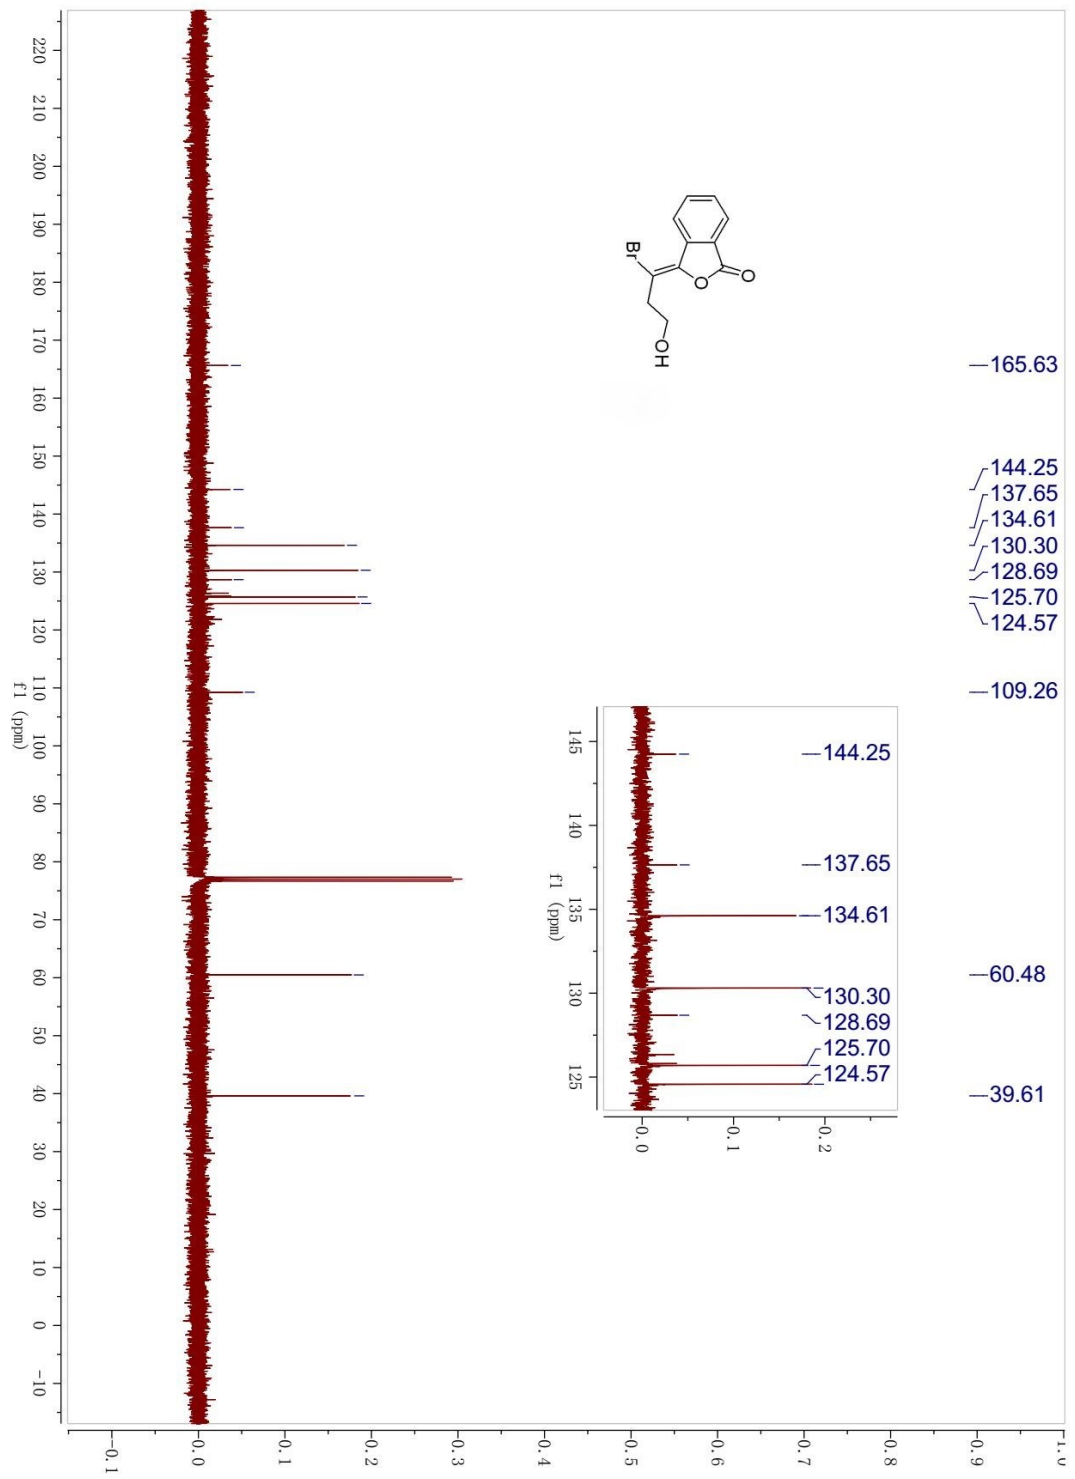

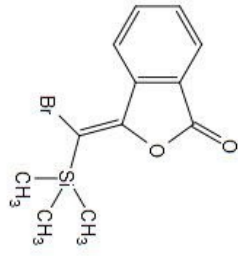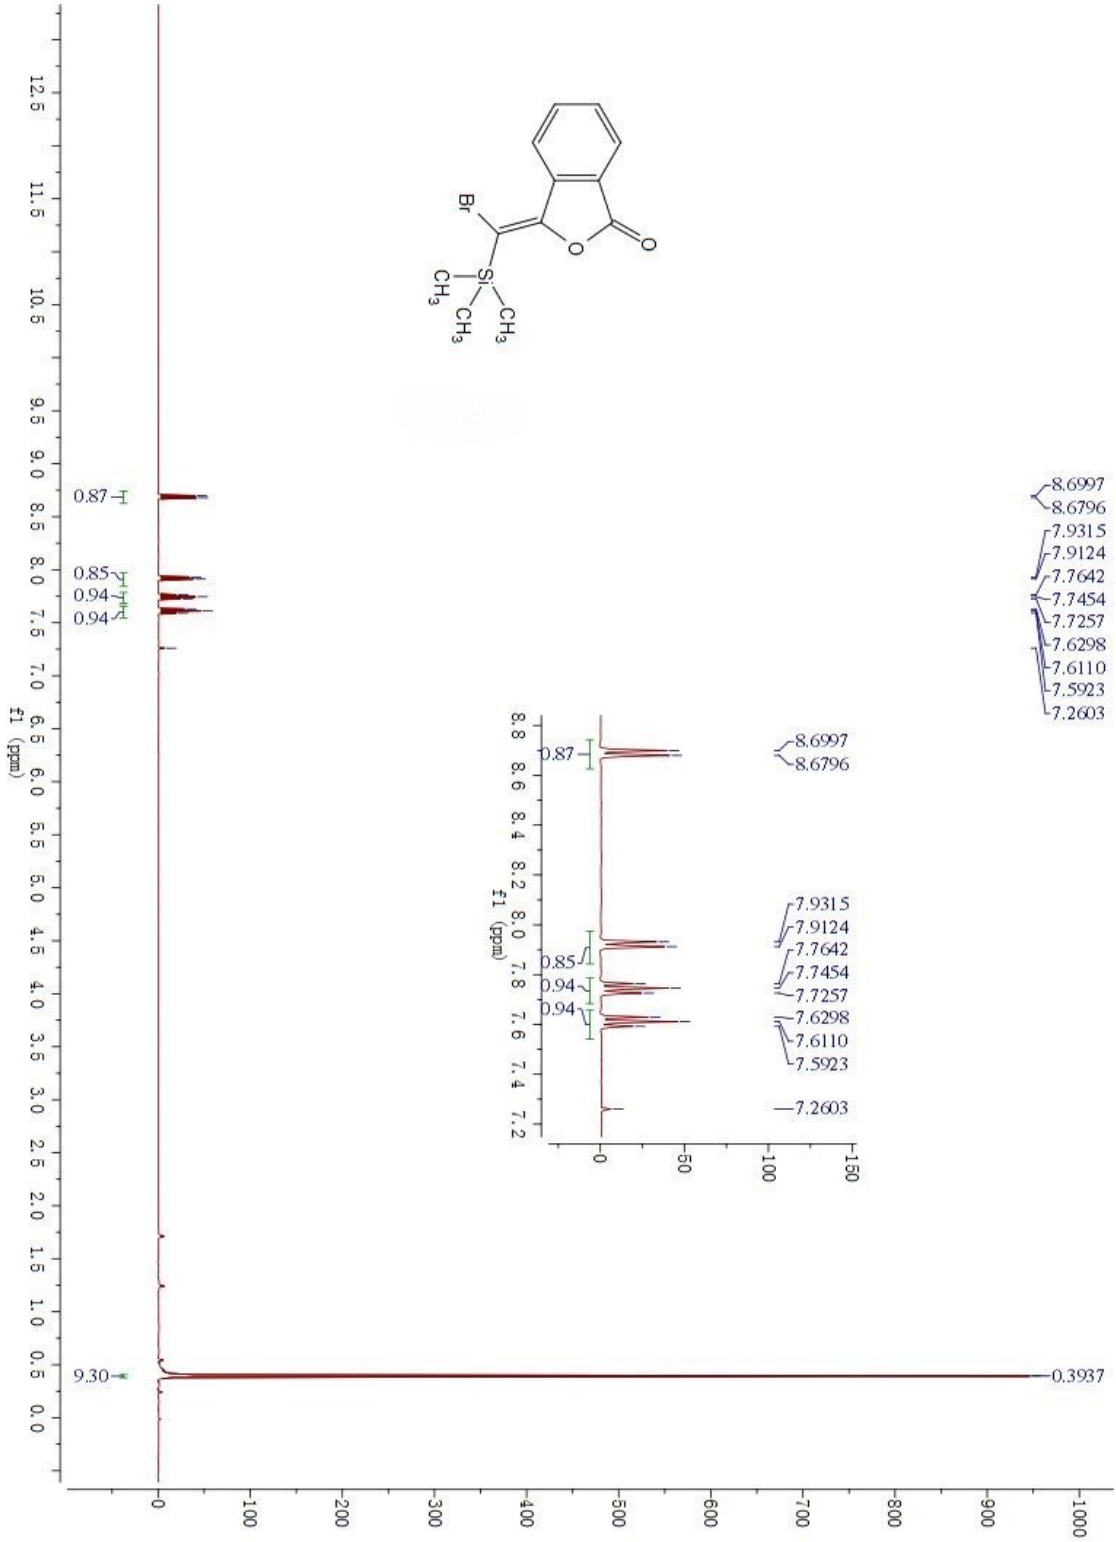

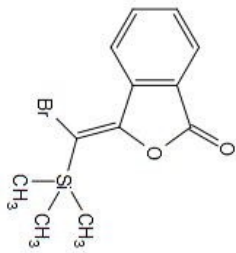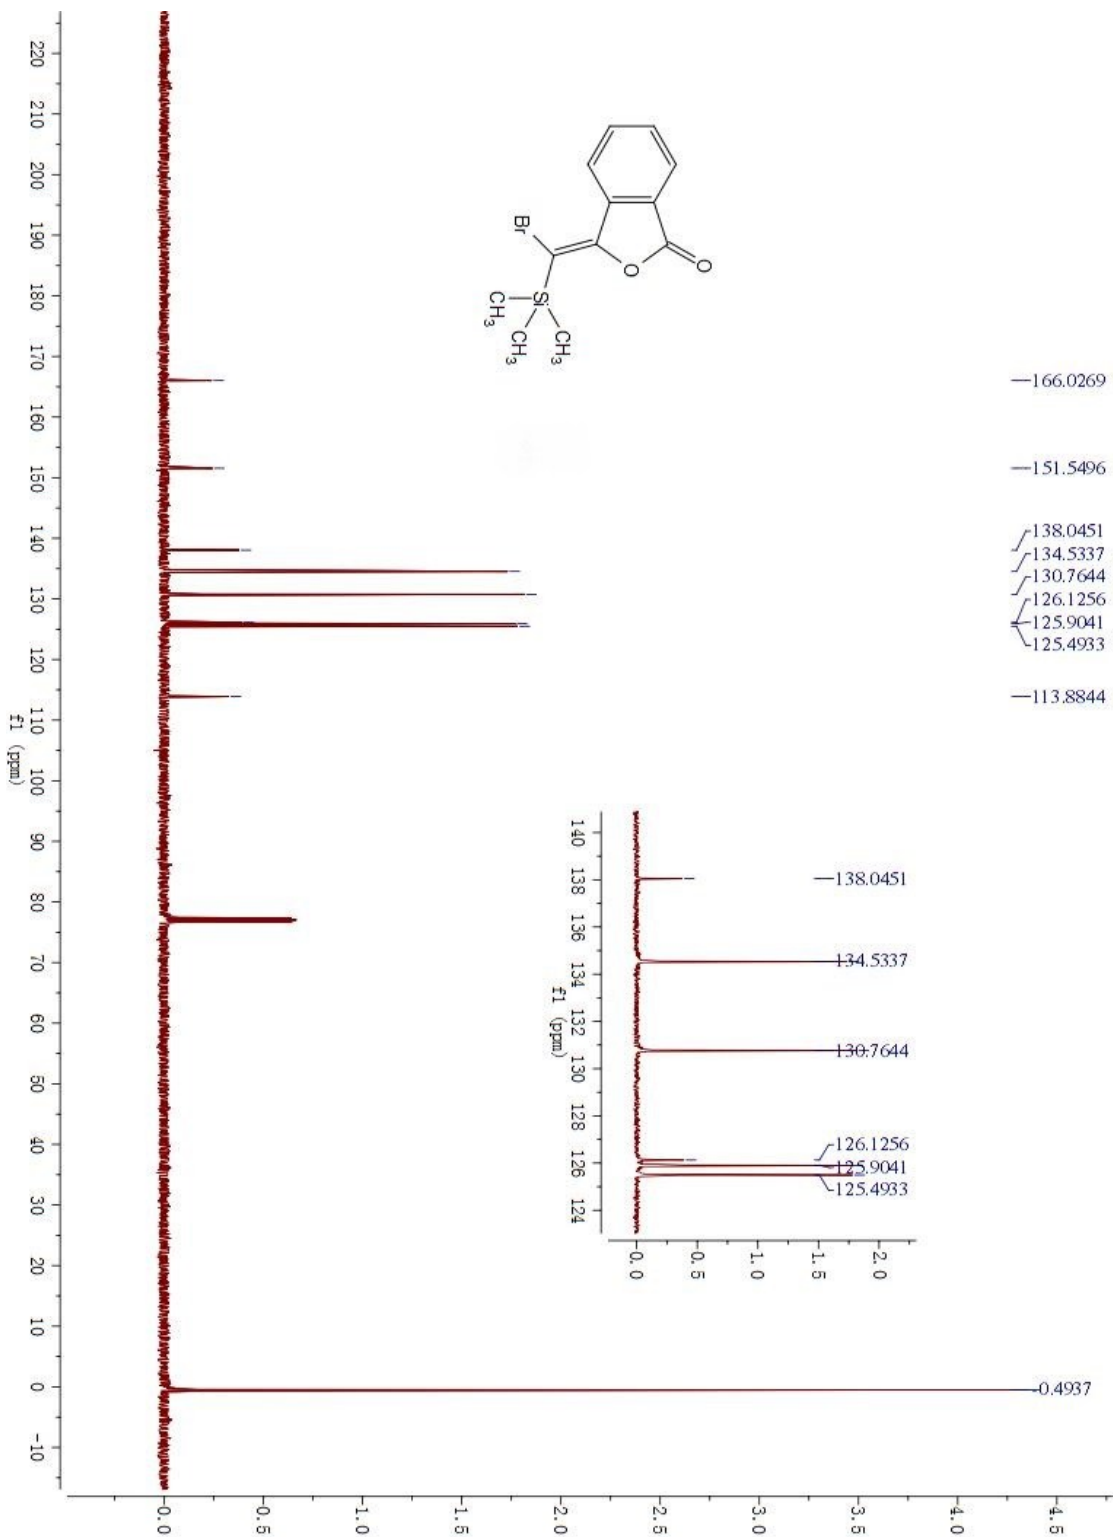

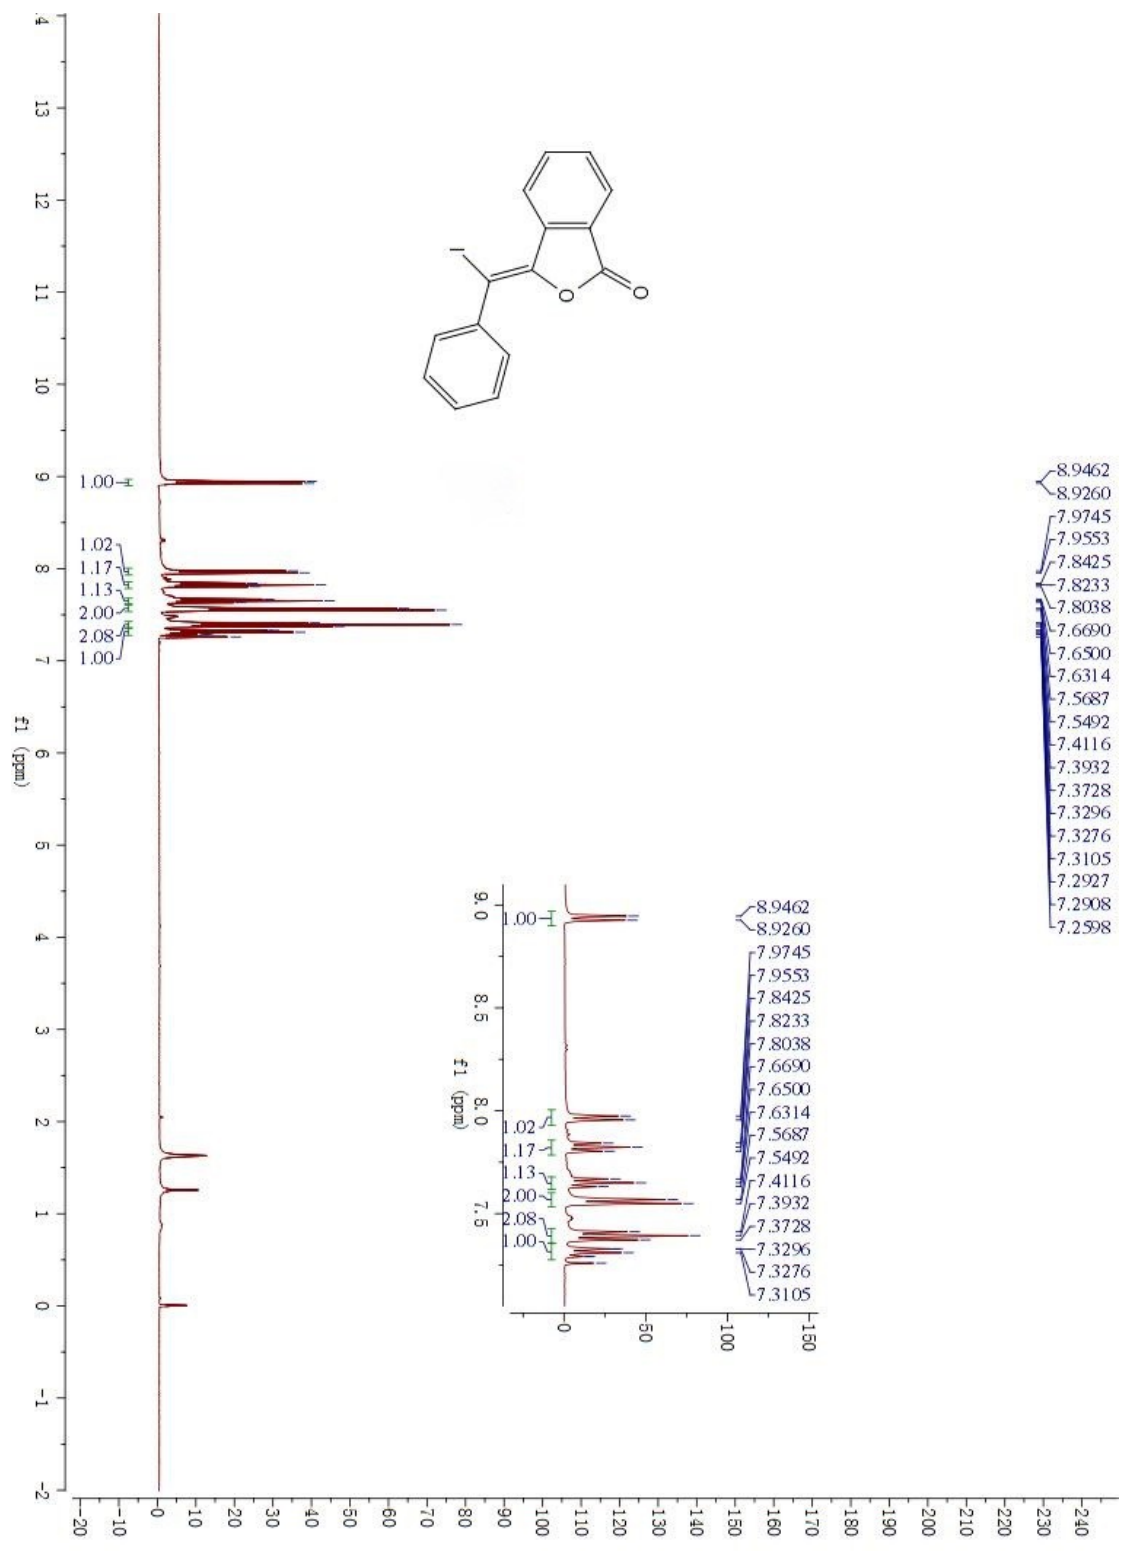

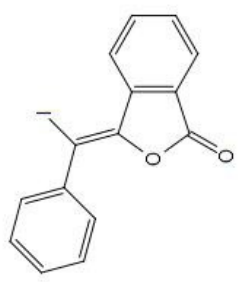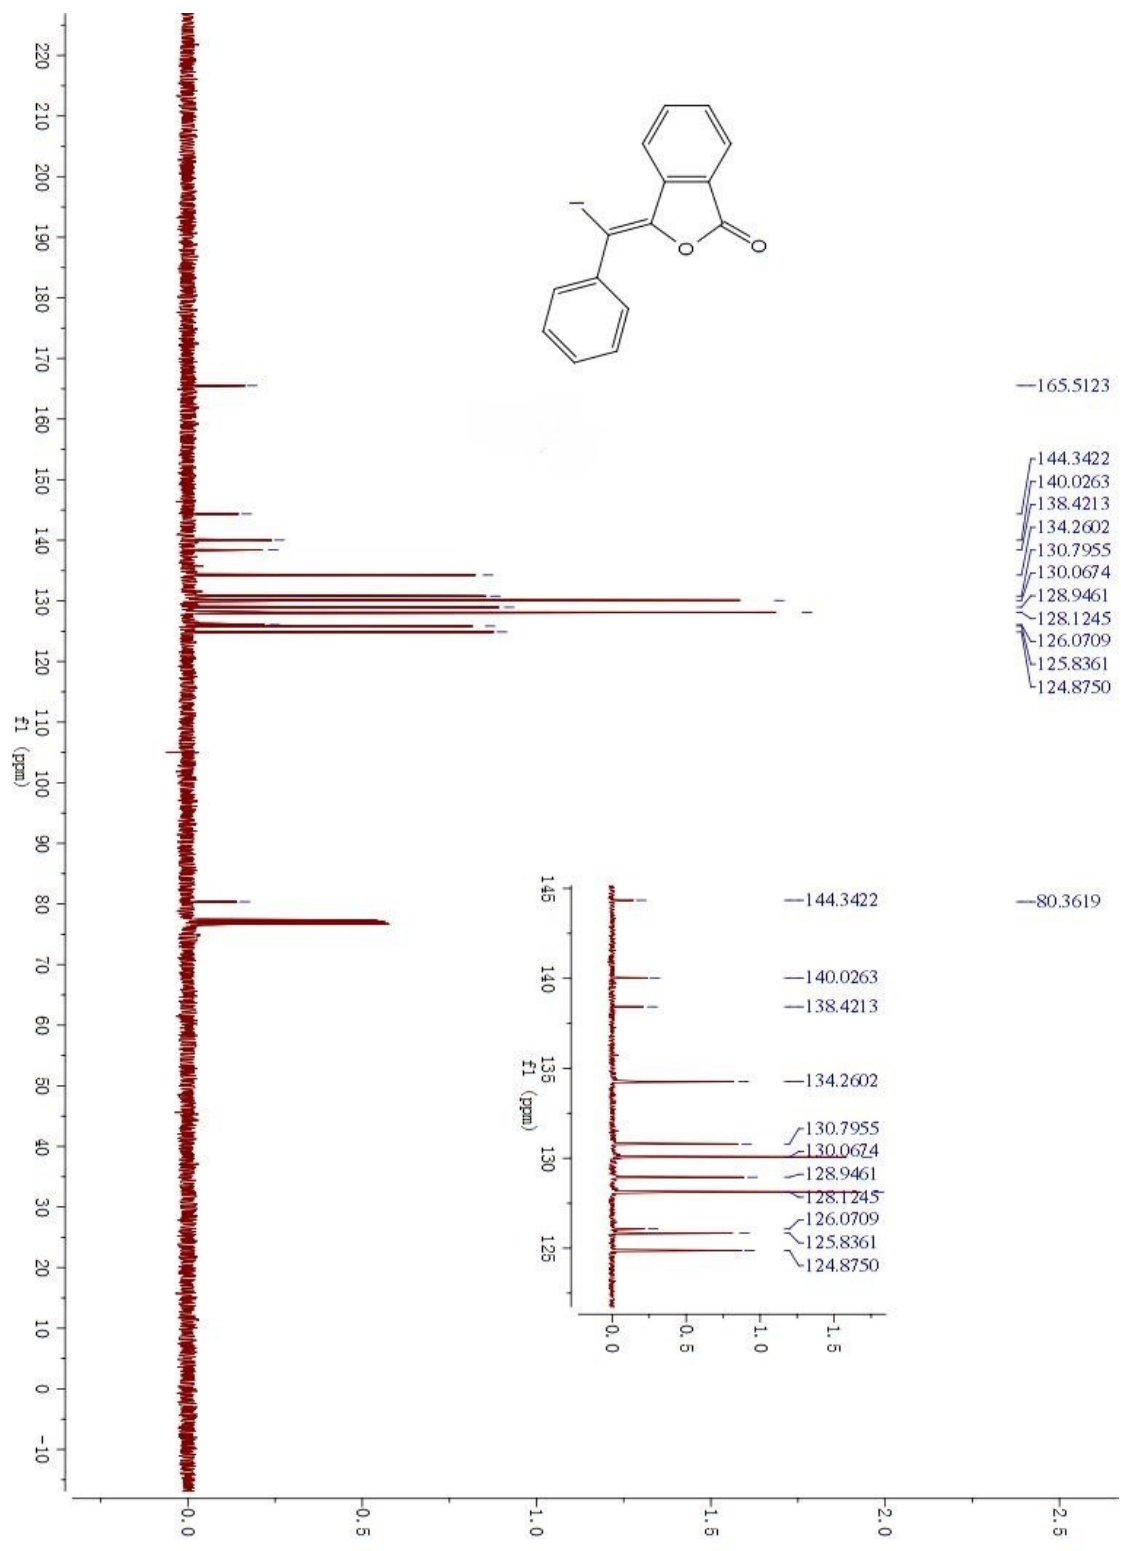



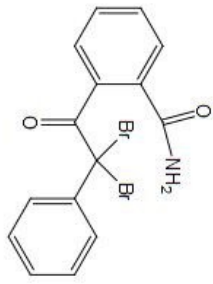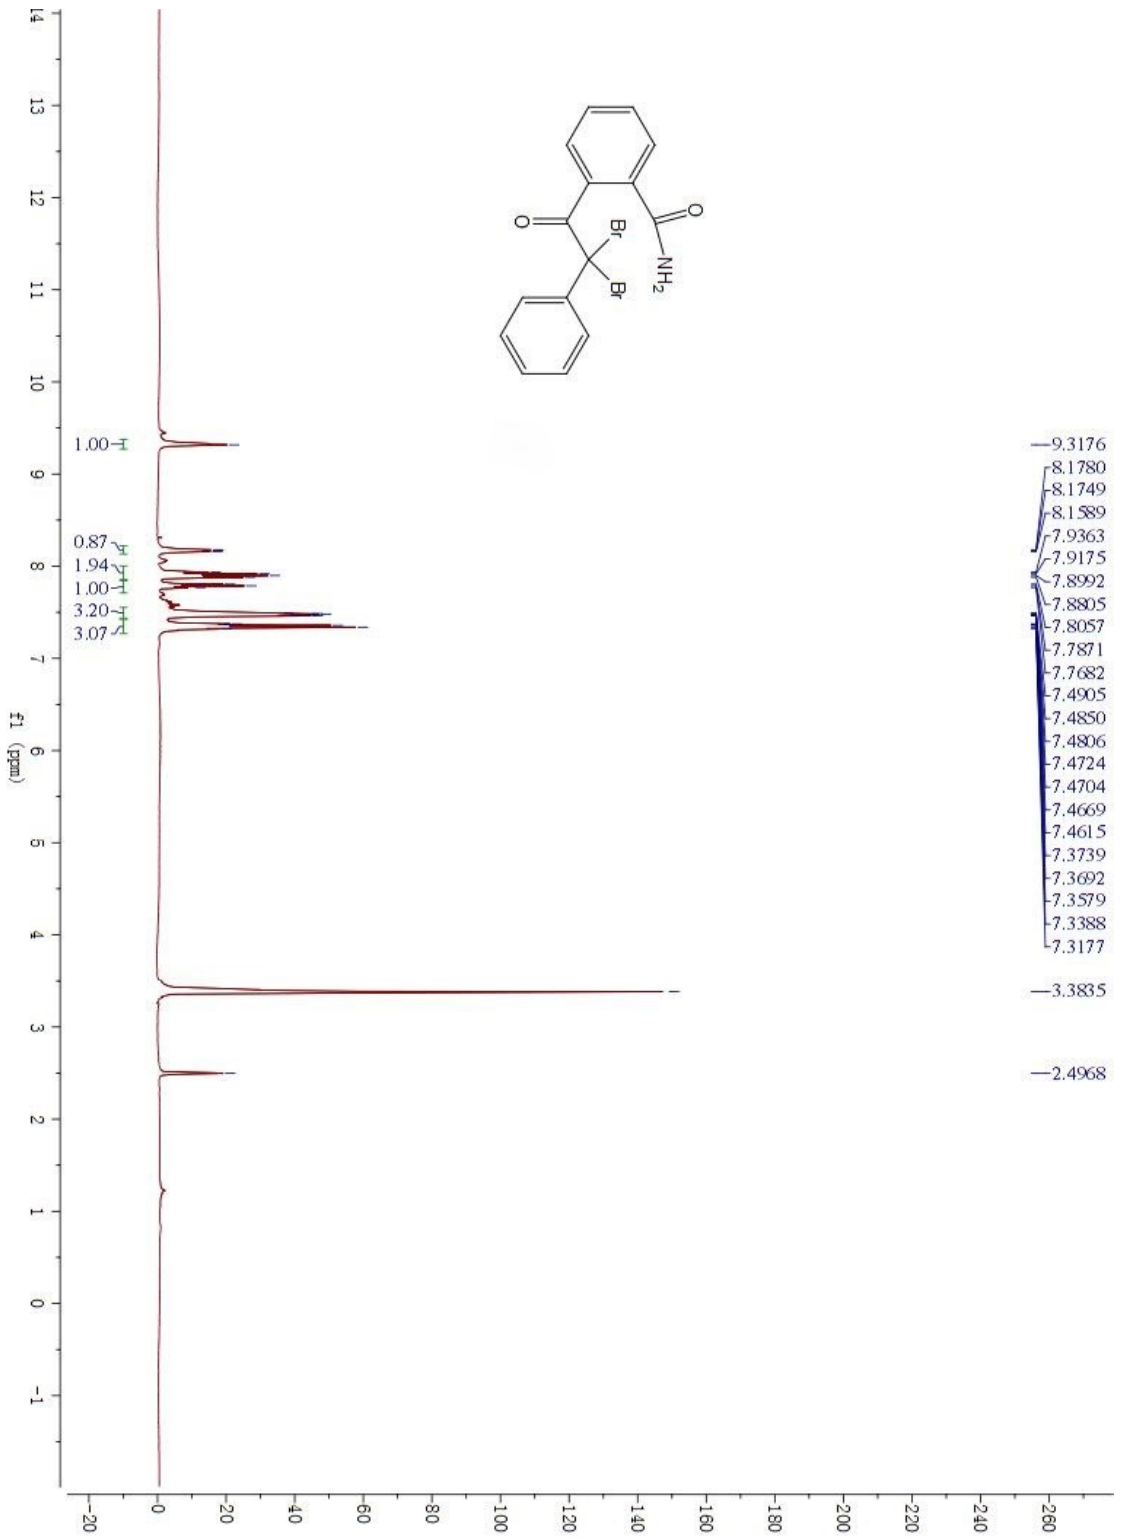

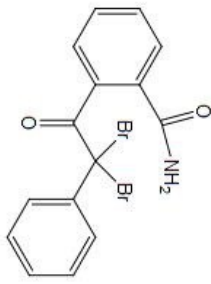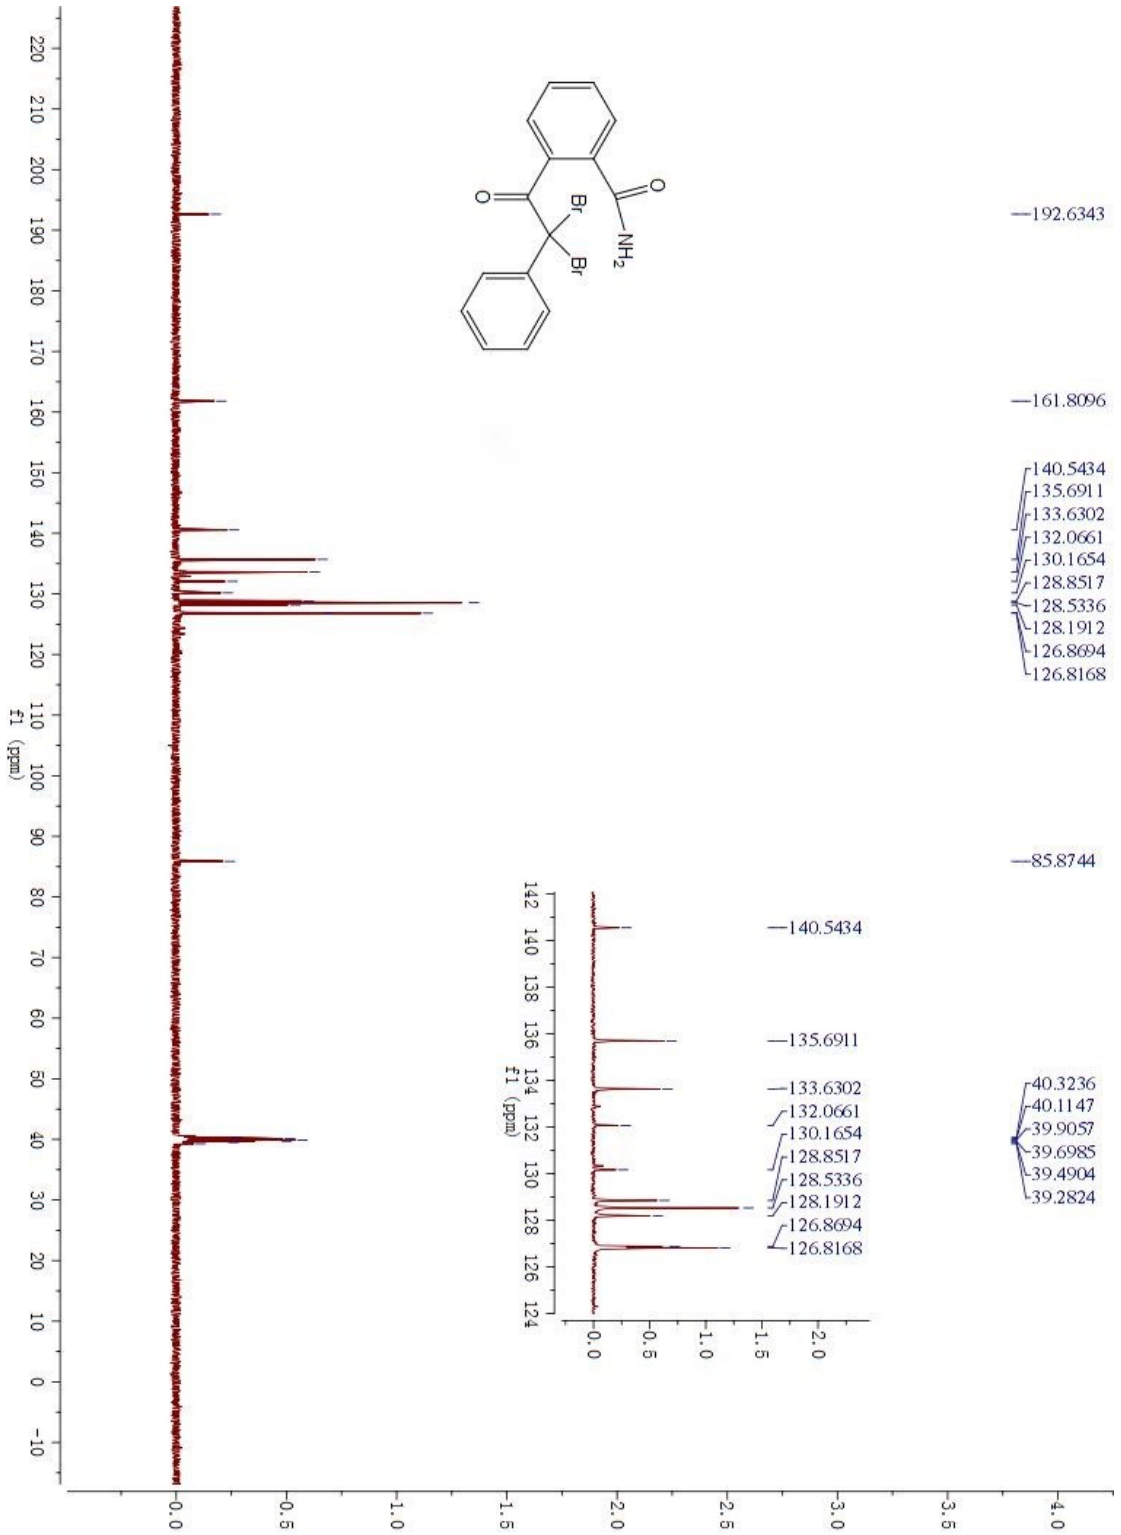

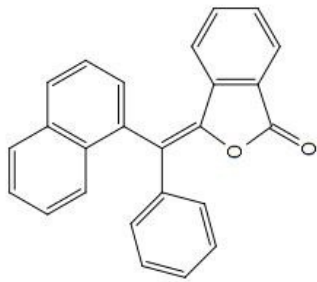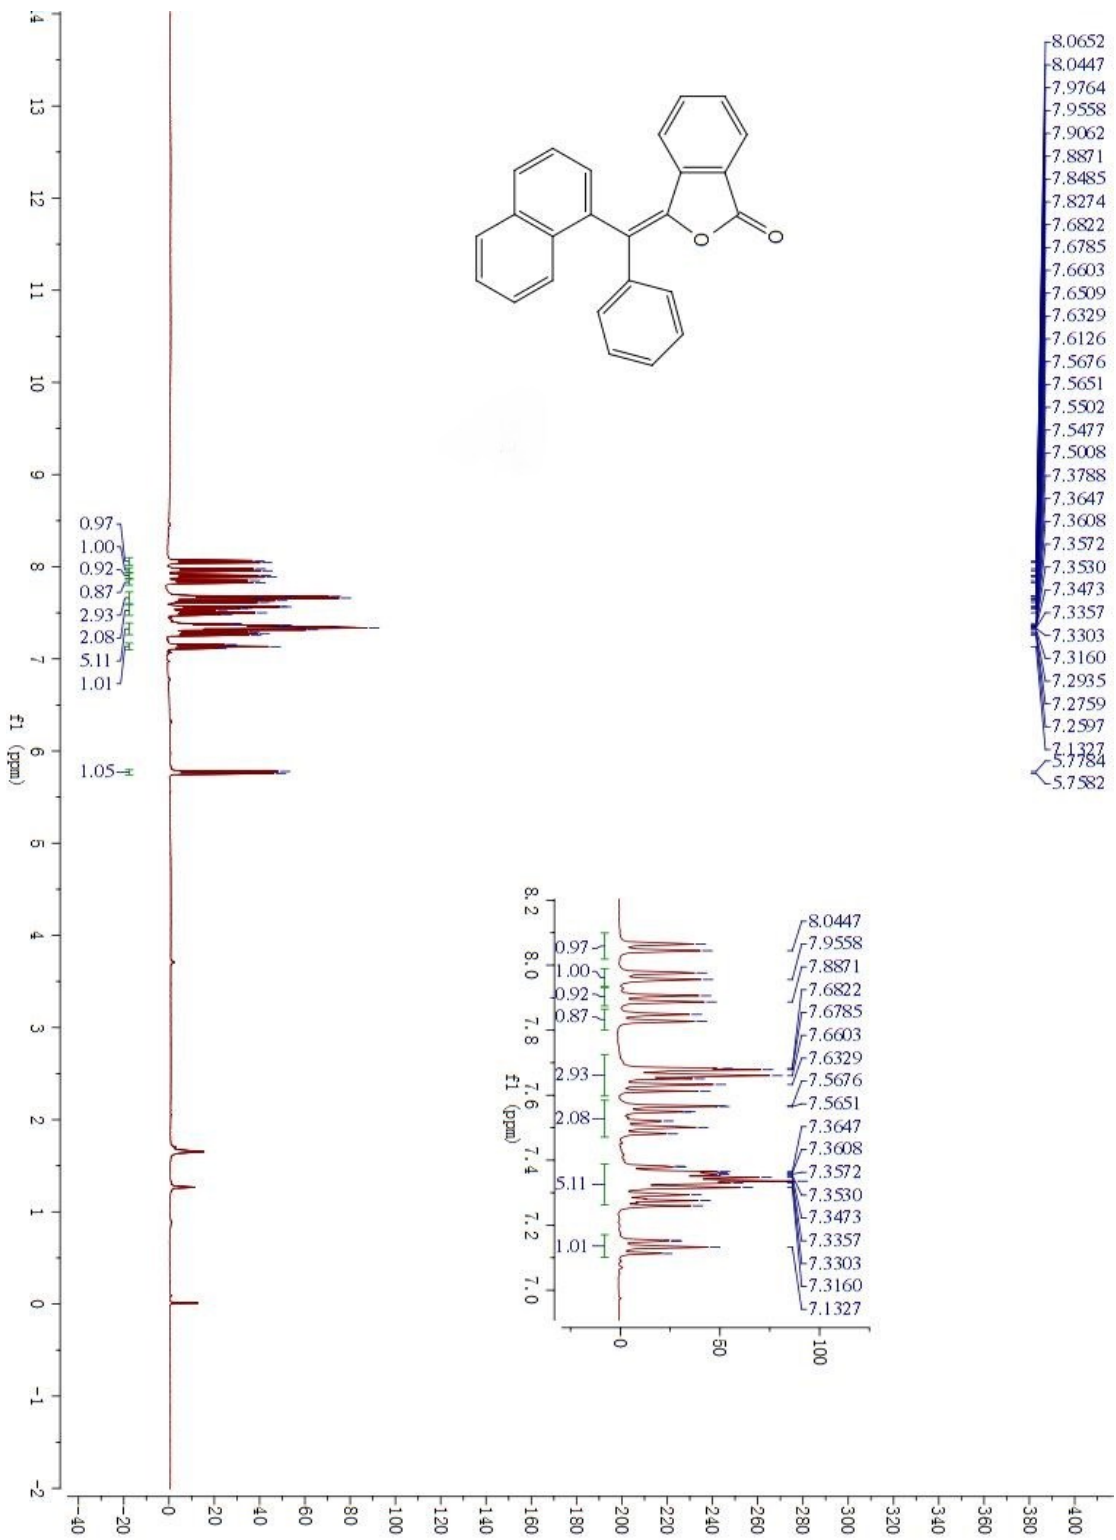

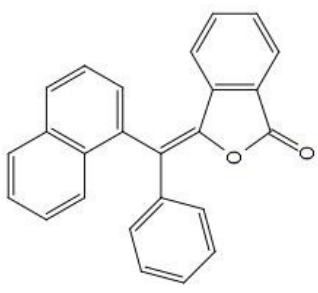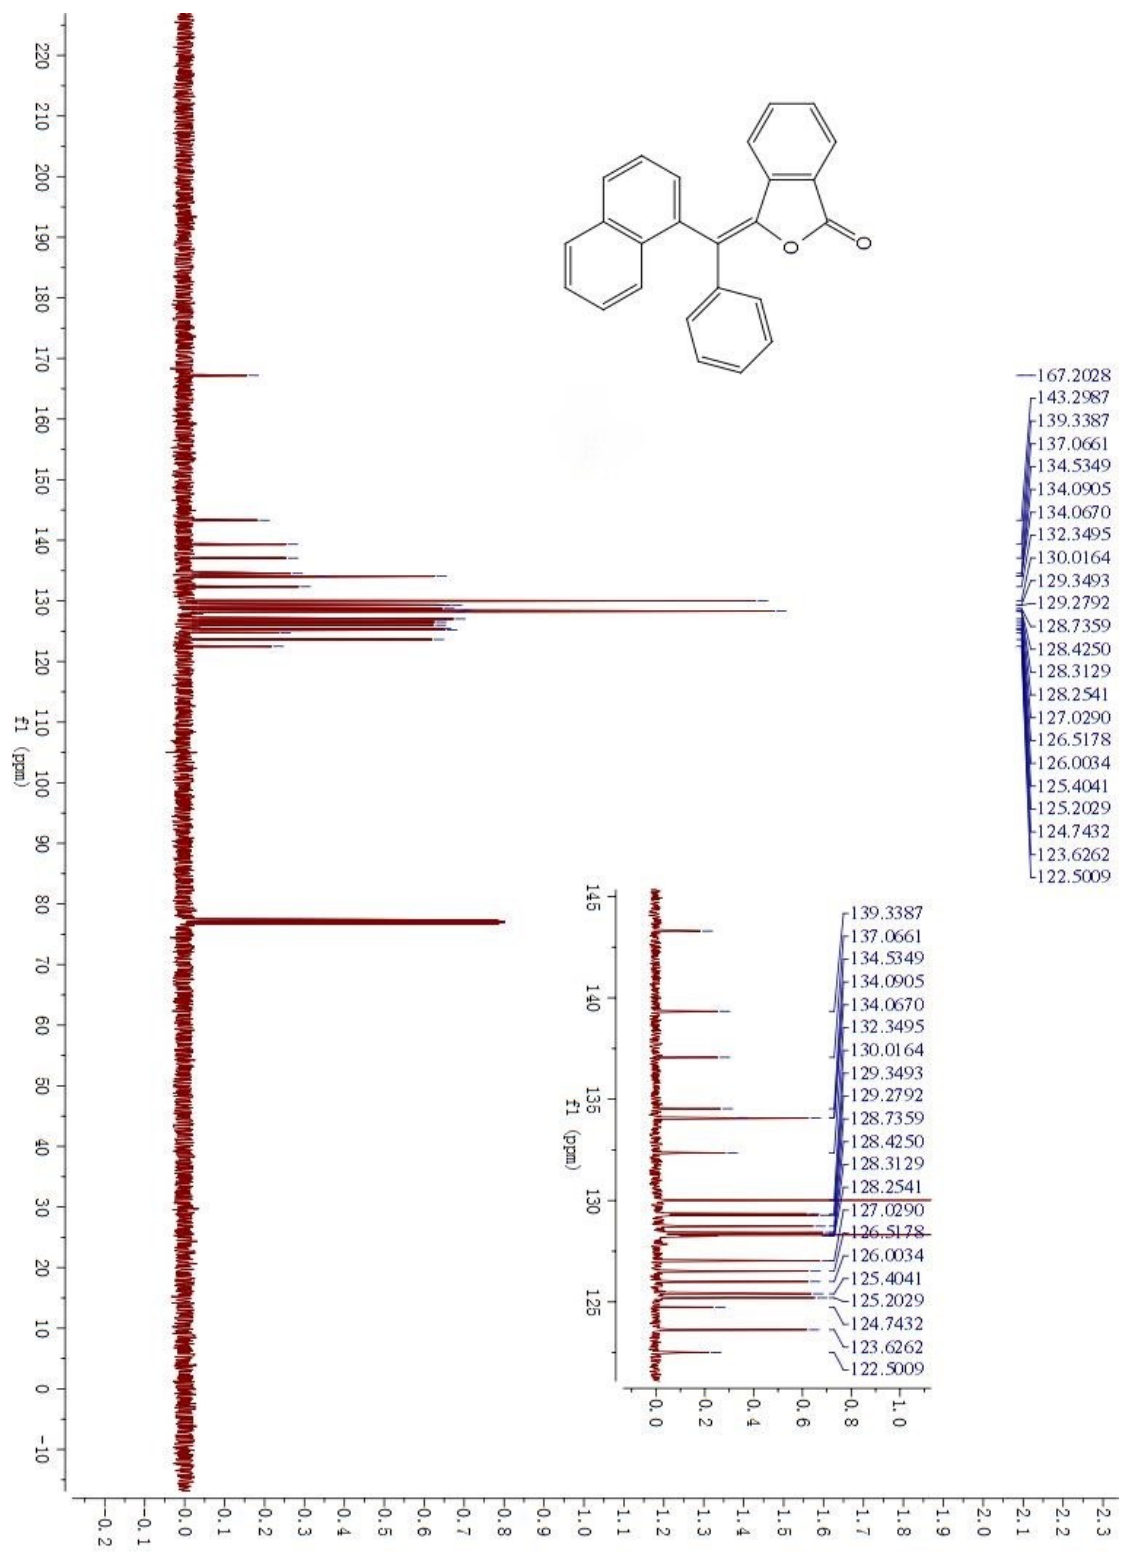

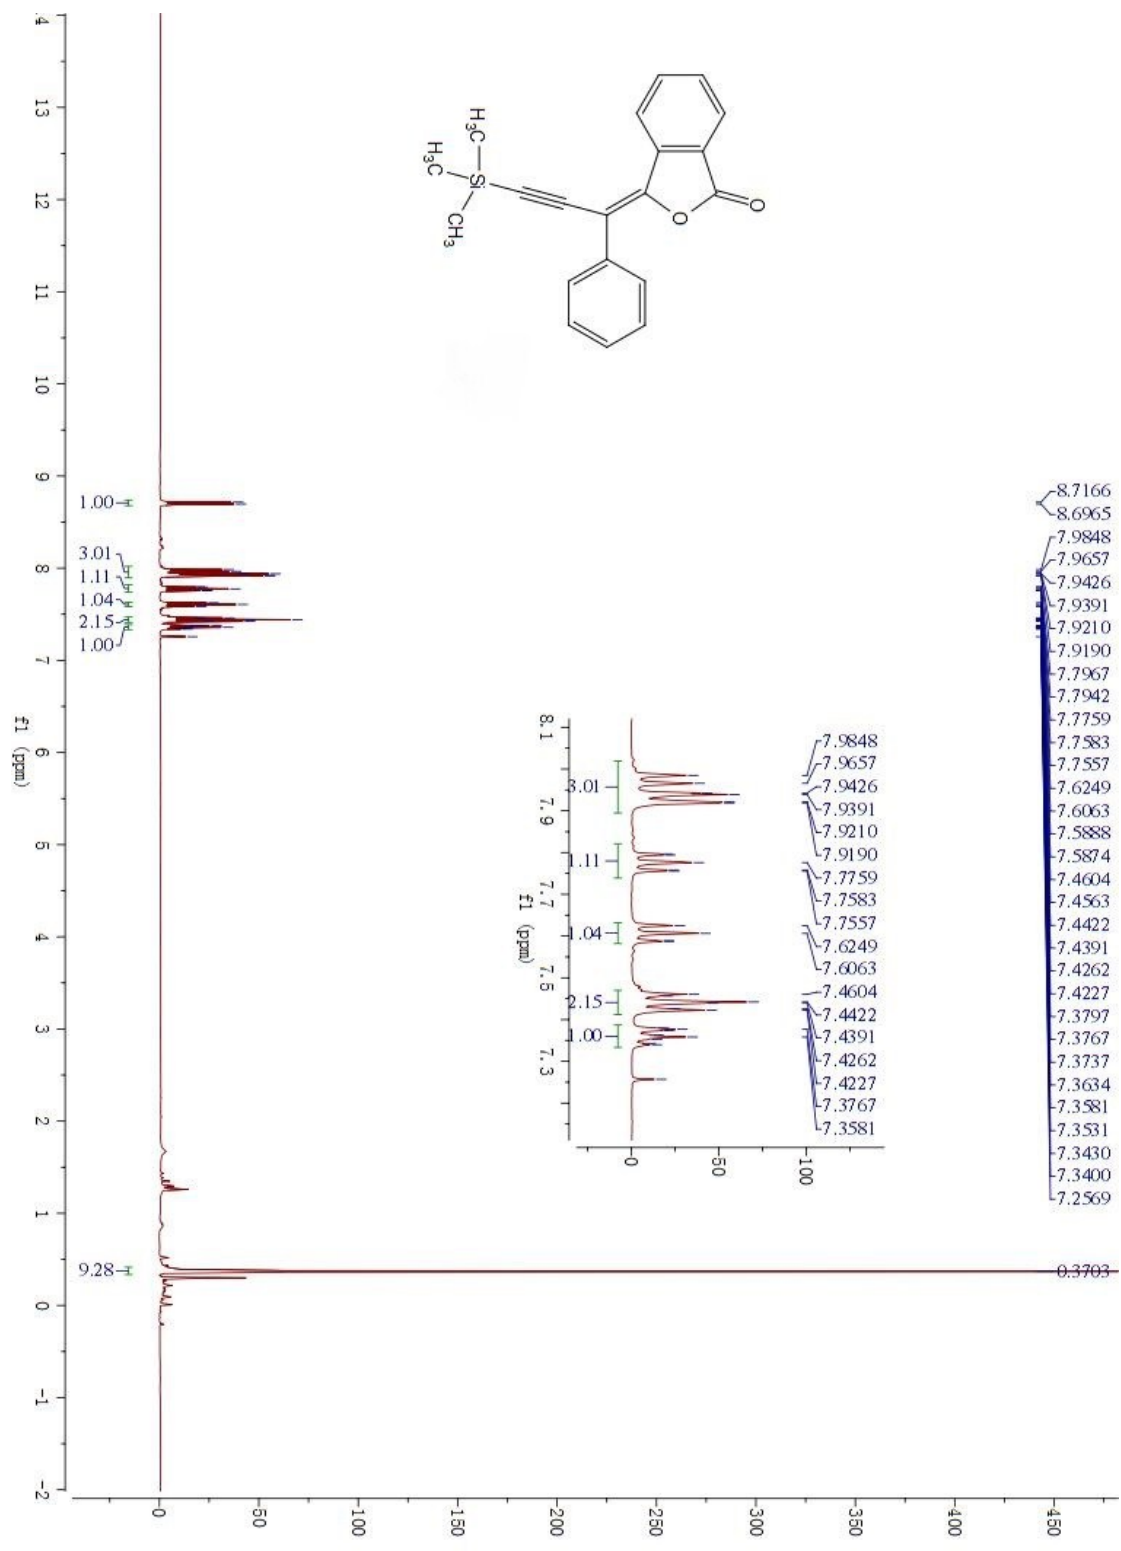

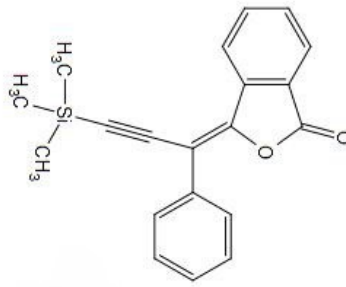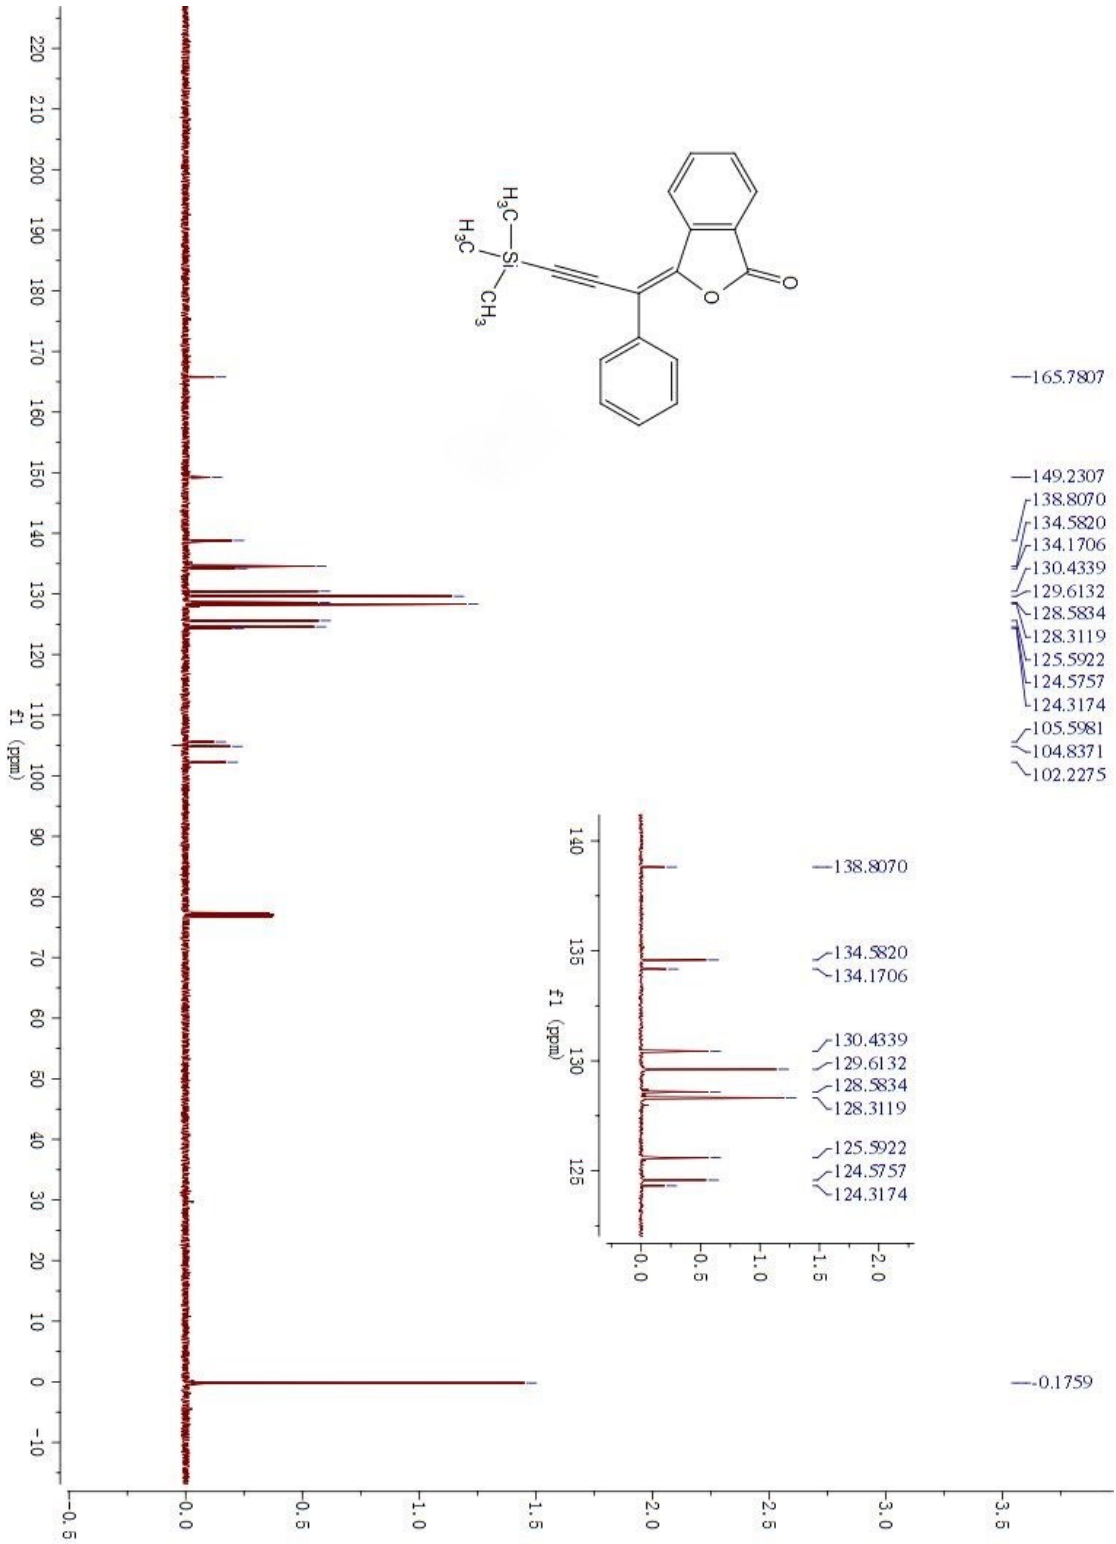

Supplement: c8ob00779a1.pdf [file c8ob00779a1.pdf]
